# Supplementary material for: Mining RNA-Seq Data to Depict How Penicillium digitatum Shapes Its Transcriptome in Response to Nanoemulsion
Source: Front Nutr. 2021 Sep 14;8:724419. doi: 10.3389/fnut.2021.724419 (PMC8476847; doi:10.3389/fnut.2021.724419)
Supplement: Supplementary file 3 [file Table_3.XLS]

GO_ID	Term	Category	Test	Ref	TestAll	RefAll	geneID	Pvalue	FDR	richFactor
GO:0045333	cellular respiration	BP	4	6	270	1627	TR38_c0_g2,TR547_c0_g3,TR7064_c0_g1,TR6239_c0_g1	0.00843742148117901	0.444274521001408	0.666666666666667
GO:1902600	proton transmembrane transport	BP	5	9	270	1627	TR10464_c0_g1,TR1758_c0_g1,TR4697_c0_g1,TR547_c0_g3,TR7064_c0_g1	0.00859375024215697	0.444274521001408	0.555555555555556
GO:0044446	intracellular organelle part	CC	23	87	270	1627	TR635_c0_g1,TR849_c0_g1,TR4839_c0_g1,TR3622_c0_g1,TR4317_c0_g1,TR709_c0_g1,TR1738_c0_g1,TR1817_c0_g1,TR4270_c0_g1,TR14438_c0_g1,TR18062_c0_g1,TR4761_c0_g1,TR10975_c0_g1,TR1758_c0_g1,TR10464_c0_g1,TR547_c0_g3,TR6239_c0_g1,TR2699_c0_g1,TR420_c0_g1,TR420_c0_g2,TR1202_c0_g1,TR10320_c0_g1,TR5275_c0_g1	0.0113167358952613	0.444274521001408	0.264367816091954
GO:0019001	guanyl nucleotide binding	MF	6	13	270	1627	TR11397_c0_g1,TR420_c0_g1,TR420_c0_g2,TR4270_c0_g1,TR591_c0_g1,TR24_c2_g1	0.0120641953470327	0.444274521001408	0.461538461538462
GO:0044422	organelle part	CC	23	88	270	1627	TR10320_c0_g1,TR5275_c0_g1,TR635_c0_g1,TR849_c0_g1,TR10464_c0_g1,TR547_c0_g3,TR6239_c0_g1,TR14438_c0_g1,TR4839_c0_g1,TR3622_c0_g1,TR4317_c0_g1,TR709_c0_g1,TR1738_c0_g1,TR10975_c0_g1,TR1817_c0_g1,TR2699_c0_g1,TR4270_c0_g1,TR420_c0_g1,TR420_c0_g2,TR18062_c0_g1,TR4761_c0_g1,TR1758_c0_g1,TR1202_c0_g1	0.0130508217545126	0.444274521001408	0.261363636363636
GO:0009141	nucleoside triphosphate metabolic process	BP	4	7	270	1627	TR547_c0_g3,TR10464_c0_g1,TR6239_c0_g1,TR1758_c0_g1	0.017136456089638	0.444274521001408	0.571428571428571
GO:0009144	purine nucleoside triphosphate metabolic process	BP	4	7	270	1627	TR547_c0_g3,TR10464_c0_g1,TR6239_c0_g1,TR1758_c0_g1	0.017136456089638	0.444274521001408	0.571428571428571
GO:0009199	ribonucleoside triphosphate metabolic process	BP	4	7	270	1627	TR547_c0_g3,TR10464_c0_g1,TR6239_c0_g1,TR1758_c0_g1	0.017136456089638	0.444274521001408	0.571428571428571
GO:0009205	purine ribonucleoside triphosphate metabolic process	BP	4	7	270	1627	TR547_c0_g3,TR10464_c0_g1,TR6239_c0_g1,TR1758_c0_g1	0.017136456089638	0.444274521001408	0.571428571428571
GO:0015980	energy derivation by oxidation of organic compounds	BP	4	7	270	1627	TR38_c0_g2,TR547_c0_g3,TR7064_c0_g1,TR6239_c0_g1	0.017136456089638	0.444274521001408	0.571428571428571
GO:0046034	ATP metabolic process	BP	4	7	270	1627	TR547_c0_g3,TR10464_c0_g1,TR6239_c0_g1,TR1758_c0_g1	0.017136456089638	0.444274521001408	0.571428571428571
GO:0043229	intracellular organelle	CC	44	199	270	1627	TR13706_c0_g1,TR3246_c0_g1,TR3093_c0_g1,TR10320_c0_g1,TR5275_c0_g1,TR7064_c0_g1,TR7166_c0_g1,TR83_c0_g1,TR1163_c0_g2,TR1738_c0_g1,TR18062_c0_g1,TR1817_c0_g1,TR2861_c0_g1,TR2890_c0_g1,TR3991_c0_g1,TR4378_c0_g1,TR5095_c0_g1,TR8106_c0_g1,TR10278_c0_g1,TR1440_c0_g1,TR1973_c0_g1,TR2704_c0_g1,TR365_c0_g2,TR635_c0_g1,TR4270_c0_g1,TR1758_c0_g1,TR849_c0_g1,TR14438_c0_g1,TR420_c0_g1,TR420_c0_g2,TR10975_c0_…	0.0188193325321499	0.444274521001408	0.221105527638191
GO:0043226	organelle	CC	44	200	270	1627	TR11224_c0_g1,TR4635_c0_g1,TR4856_c1_g1,TR13706_c0_g1,TR3246_c0_g1,TR3093_c0_g1,TR7064_c0_g1,TR7166_c0_g1,TR83_c0_g1,TR10320_c0_g1,TR1163_c0_g2,TR1738_c0_g1,TR18062_c0_g1,TR1817_c0_g1,TR2861_c0_g1,TR2890_c0_g1,TR3991_c0_g1,TR4378_c0_g1,TR5095_c0_g1,TR5275_c0_g1,TR8106_c0_g1,TR10278_c0_g1,TR1440_c0_g1,TR1973_c0_g1,TR2704_c0_g1,TR365_c0_g2,TR635_c0_g1,TR4270_c0_g1,TR1758_c0_g1,TR849_c0_g1,TR14438_c…	0.0205287136174601	0.444274521001408	0.22
GO:0006325	chromatin organization	BP	5	11	270	1627	TR2890_c0_g1,TR1202_c0_g1,TR3246_c0_g1,TR11224_c0_g1,TR4856_c1_g1	0.0236566184252064	0.444274521001408	0.454545454545455
GO:0015078	proton transmembrane transporter activity	MF	5	11	270	1627	TR1758_c0_g1,TR547_c0_g3,TR7064_c0_g1,TR4697_c0_g1,TR10464_c0_g1	0.0236566184252064	0.444274521001408	0.454545454545455
GO:0006996	organelle organization	BP	12	40	270	1627	TR4270_c0_g1,TR10975_c0_g1,TR11224_c0_g1,TR4856_c1_g1,TR2890_c0_g1,TR1202_c0_g1,TR1163_c0_g2,TR5275_c0_g1,TR14438_c0_g1,TR3246_c0_g1,TR635_c0_g1,TR849_c0_g1	0.0238314180916128	0.444274521001408	0.3
GO:0000280	nuclear division	BP	2	2	270	1627	TR1163_c0_g2,TR5275_c0_g1	0.0274541466988118	0.444274521001408	1
GO:0000281	mitotic cytokinesis	BP	2	2	270	1627	TR635_c0_g1,TR4270_c0_g1	0.0274541466988118	0.444274521001408	1
GO:0003006	developmental process involved in reproduction	BP	2	2	270	1627	TR591_c0_g1,TR420_c0_g1	0.0274541466988118	0.444274521001408	1
GO:0006119	oxidative phosphorylation	BP	2	2	270	1627	TR6239_c0_g1,TR547_c0_g3	0.0274541466988118	0.444274521001408	1
GO:0033044	regulation of chromosome organization	BP	2	2	270	1627	TR5275_c0_g1,TR3246_c0_g1	0.0274541466988118	0.444274521001408	1
GO:0043934	sporulation	BP	2	2	270	1627	TR420_c0_g1,TR591_c0_g1	0.0274541466988118	0.444274521001408	1
GO:0061640	cytoskeleton-dependent cytokinesis	BP	2	2	270	1627	TR4270_c0_g1,TR635_c0_g1	0.0274541466988118	0.444274521001408	1
GO:1903046	meiotic cell cycle process	BP	2	2	270	1627	TR1163_c0_g2,TR420_c0_g1	0.0274541466988118	0.444274521001408	1
GO:0005200	structural constituent of cytoskeleton	MF	2	2	270	1627	TR420_c0_g1,TR420_c0_g2	0.0274541466988118	0.444274521001408	1
GO:0051920	peroxiredoxin activity	MF	2	2	270	1627	TR16620_c0_g1,TR16623_c0_g1	0.0274541466988118	0.444274521001408	1
GO:0005798	Golgi-associated vesicle	CC	2	2	270	1627	TR14438_c0_g1,TR18062_c0_g1	0.0274541466988118	0.444274521001408	1
GO:0005839	proteasome core complex	CC	2	2	270	1627	TR4378_c0_g1,TR1589_c0_g1	0.0274541466988118	0.444274521001408	1
GO:0012506	vesicle membrane	CC	2	2	270	1627	TR14438_c0_g1,TR18062_c0_g1	0.0274541466988118	0.444274521001408	1
GO:0030117	membrane coat	CC	2	2	270	1627	TR18062_c0_g1,TR3971_c0_g1	0.0274541466988118	0.444274521001408	1
GO:0030135	coated vesicle	CC	2	2	270	1627	TR14438_c0_g1,TR18062_c0_g1	0.0274541466988118	0.444274521001408	1
GO:0030659	cytoplasmic vesicle membrane	CC	2	2	270	1627	TR14438_c0_g1,TR18062_c0_g1	0.0274541466988118	0.444274521001408	1
GO:0030660	Golgi-associated vesicle membrane	CC	2	2	270	1627	TR14438_c0_g1,TR18062_c0_g1	0.0274541466988118	0.444274521001408	1
GO:0030662	coated vesicle membrane	CC	2	2	270	1627	TR14438_c0_g1,TR18062_c0_g1	0.0274541466988118	0.444274521001408	1
GO:0044433	cytoplasmic vesicle part	CC	2	2	270	1627	TR18062_c0_g1,TR14438_c0_g1	0.0274541466988118	0.444274521001408	1
GO:0048475	coated membrane	CC	2	2	270	1627	TR18062_c0_g1,TR3971_c0_g1	0.0274541466988118	0.444274521001408	1
GO:0070469	respiratory chain	CC	2	2	270	1627	TR547_c0_g3,TR6239_c0_g1	0.0274541466988118	0.444274521001408	1
GO:0003924	GTPase activity	MF	4	8	270	1627	TR420_c0_g1,TR420_c0_g2,TR4270_c0_g1,TR591_c0_g1	0.0298601366481217	0.444274521001408	0.5
GO:0004175	endopeptidase activity	MF	4	8	270	1627	TR2813_c0_g1,TR1091_c0_g1,TR4378_c0_g1,TR1589_c0_g1	0.0298601366481217	0.444274521001408	0.5
GO:0009060	aerobic respiration	BP	3	5	270	1627	TR38_c0_g2,TR7064_c0_g1,TR547_c0_g3	0.0348440415192166	0.444274521001408	0.6
GO:0048193	Golgi vesicle transport	BP	3	5	270	1627	TR14438_c0_g1,TR18062_c0_g1,TR4761_c0_g1	0.0348440415192166	0.444274521001408	0.6
GO:0008131	primary amine oxidase activity	MF	3	5	270	1627	TR16469_c0_g1,TR2262_c0_g1,TR971_c0_g1	0.0348440415192166	0.444274521001408	0.6
GO:0016641	oxidoreductase activity, acting on the CH-NH2 group of donors, oxygen as acceptor	MF	3	5	270	1627	TR16469_c0_g1,TR2262_c0_g1,TR971_c0_g1	0.0348440415192166	0.444274521001408	0.6
GO:0046912	transferase activity, transferring acyl groups, acyl groups converted into alkyl on transfer	MF	3	5	270	1627	TR38_c0_g2,TR1419_c0_g1,TR283_c0_g1	0.0348440415192166	0.444274521001408	0.6
GO:0009308	amine metabolic process	BP	5	12	270	1627	TR6217_c0_g1,TR591_c0_g1,TR16469_c0_g1,TR2262_c0_g1,TR971_c0_g1	0.0351777035152067	0.444274521001408	0.416666666666667
GO:0015672	monovalent inorganic cation transport	BP	5	12	270	1627	TR4697_c0_g1,TR547_c0_g3,TR7064_c0_g1,TR10464_c0_g1,TR1758_c0_g1	0.0351777035152067	0.444274521001408	0.416666666666667
GO:0098662	inorganic cation transmembrane transport	BP	5	12	270	1627	TR4697_c0_g1,TR547_c0_g3,TR7064_c0_g1,TR10464_c0_g1,TR1758_c0_g1	0.0351777035152067	0.444274521001408	0.416666666666667
GO:0001883	purine nucleoside binding	MF	5	12	270	1627	TR11397_c0_g1,TR420_c0_g1,TR420_c0_g2,TR4270_c0_g1,TR591_c0_g1	0.0351777035152067	0.444274521001408	0.416666666666667
GO:0005525	GTP binding	MF	5	12	270	1627	TR11397_c0_g1,TR420_c0_g1,TR420_c0_g2,TR4270_c0_g1,TR591_c0_g1	0.0351777035152067	0.444274521001408	0.416666666666667
GO:0015077	monovalent inorganic cation transmembrane transporter activity	MF	5	12	270	1627	TR1758_c0_g1,TR547_c0_g3,TR7064_c0_g1,TR10464_c0_g1,TR4697_c0_g1	0.0351777035152067	0.444274521001408	0.416666666666667
GO:0032550	purine ribonucleoside binding	MF	5	12	270	1627	TR11397_c0_g1,TR420_c0_g1,TR420_c0_g2,TR4270_c0_g1,TR591_c0_g1	0.0351777035152067	0.444274521001408	0.416666666666667
GO:0032561	guanyl ribonucleotide binding	MF	5	12	270	1627	TR11397_c0_g1,TR420_c0_g1,TR420_c0_g2,TR4270_c0_g1,TR591_c0_g1	0.0351777035152067	0.444274521001408	0.416666666666667
GO:0007049	cell cycle	BP	7	20	270	1627	TR4270_c0_g1,TR3246_c0_g1,TR4856_c1_g1,TR1163_c0_g2,TR5275_c0_g1,TR420_c0_g1,TR635_c0_g1	0.0354229239669775	0.444274521001408	0.35
GO:0051276	chromosome organization	BP	7	20	270	1627	TR10975_c0_g1,TR11224_c0_g1,TR4856_c1_g1,TR2890_c0_g1,TR1202_c0_g1,TR5275_c0_g1,TR3246_c0_g1	0.0354229239669775	0.444274521001408	0.35
GO:0016043	cellular component organization	BP	14	52	270	1627	TR4270_c0_g1,TR10975_c0_g1,TR11224_c0_g1,TR4856_c1_g1,TR2890_c0_g1,TR1202_c0_g1,TR849_c0_g1,TR1163_c0_g2,TR5275_c0_g1,TR14438_c0_g1,TR420_c0_g1,TR4378_c0_g1,TR3246_c0_g1,TR635_c0_g1	0.0381475887054733	0.444274521001408	0.269230769230769
GO:0009893	positive regulation of metabolic process	BP	4	9	270	1627	TR3246_c0_g1,TR4270_c0_g1,TR10975_c0_g1,TR591_c0_g1	0.0468732457728936	0.444274521001408	0.444444444444444
GO:0031325	positive regulation of cellular metabolic process	BP	4	9	270	1627	TR4270_c0_g1,TR10975_c0_g1,TR591_c0_g1,TR3246_c0_g1	0.0468732457728936	0.444274521001408	0.444444444444444
GO:0098660	inorganic ion transmembrane transport	BP	5	13	270	1627	TR4697_c0_g1,TR547_c0_g3,TR7064_c0_g1,TR10464_c0_g1,TR1758_c0_g1	0.0496236461203155	0.444274521001408	0.384615384615385
GO:0044444	cytoplasmic part	CC	29	131	270	1627	TR7064_c0_g1,TR7166_c0_g1,TR83_c0_g1,TR1008_c1_g1,TR1589_c0_g1,TR1758_c0_g1,TR18062_c0_g1,TR1817_c0_g1,TR2861_c0_g1,TR3800_c0_g1,TR4317_c0_g1,TR4839_c0_g1,TR1973_c0_g1,TR2704_c0_g1,TR365_c0_g2,TR849_c0_g1,TR635_c0_g1,TR3971_c0_g1,TR709_c0_g1,TR3622_c0_g1,TR14438_c0_g1,TR4761_c0_g1,TR4270_c0_g1,TR4378_c0_g1,TR10464_c0_g1,TR547_c0_g3,TR6239_c0_g1,TR13706_c0_g1,TR3246_c0_g1	0.0524004177908294	0.444274521001408	0.221374045801527
GO:0016491	oxidoreductase activity	MF	51	253	270	1627	TR4196_c0_g1,TR13_c0_g1,TR547_c0_g3,TR7064_c0_g1,TR3335_c0_g1,TR2607_c0_g1,TR16469_c0_g1,TR2262_c0_g1,TR971_c0_g1,TR6239_c0_g1,TR5183_c0_g1,TR1832_c0_g1,TR3095_c0_g1,TR7640_c0_g1,TR2718_c0_g1,TR18385_c0_g1,TR16620_c0_g1,TR16623_c0_g1,TR4424_c0_g1,TR1227_c1_g1,TR12812_c0_g1,TR14461_c0_g1,TR15031_c0_g1,TR2386_c0_g1,TR3932_c0_g1,TR4231_c0_g1,TR4322_c0_g1,TR4442_c0_g1,TR4644_c0_g1,TR4711_c0_g2,TR4909…	0.0608631243554832	0.444274521001408	0.201581027667984
GO:0051726	regulation of cell cycle	BP	3	6	270	1627	TR5275_c0_g1,TR3246_c0_g1,TR4856_c1_g1	0.0612506615572542	0.444274521001408	0.5
GO:0044431	Golgi apparatus part	CC	3	6	270	1627	TR14438_c0_g1,TR18062_c0_g1,TR4761_c0_g1	0.0612506615572542	0.444274521001408	0.5
GO:0006091	generation of precursor metabolites and energy	BP	5	14	270	1627	TR3335_c0_g1,TR38_c0_g2,TR547_c0_g3,TR7064_c0_g1,TR6239_c0_g1	0.0670639941490773	0.444274521001408	0.357142857142857
GO:0022402	cell cycle process	BP	5	14	270	1627	TR4270_c0_g1,TR1163_c0_g2,TR5275_c0_g1,TR420_c0_g1,TR635_c0_g1	0.0670639941490773	0.444274521001408	0.357142857142857
GO:0001882	nucleoside binding	MF	5	14	270	1627	TR11397_c0_g1,TR420_c0_g1,TR420_c0_g2,TR4270_c0_g1,TR591_c0_g1	0.0670639941490773	0.444274521001408	0.357142857142857
GO:0032549	ribonucleoside binding	MF	5	14	270	1627	TR11397_c0_g1,TR420_c0_g1,TR420_c0_g2,TR4270_c0_g1,TR591_c0_g1	0.0670639941490773	0.444274521001408	0.357142857142857
GO:0006101	citrate metabolic process	BP	2	3	270	1627	TR38_c0_g2,TR283_c0_g1	0.0733067954007043	0.444274521001408	0.666666666666667
GO:0006338	chromatin remodeling	BP	2	3	270	1627	TR2890_c0_g1,TR1202_c0_g1	0.0733067954007043	0.444274521001408	0.666666666666667
GO:0007017	microtubule-based process	BP	2	3	270	1627	TR420_c0_g1,TR420_c0_g2	0.0733067954007043	0.444274521001408	0.666666666666667
GO:0019953	sexual reproduction	BP	2	3	270	1627	TR591_c0_g1,TR420_c0_g1	0.0733067954007043	0.444274521001408	0.666666666666667
GO:0022904	respiratory electron transport chain	BP	2	3	270	1627	TR7064_c0_g1,TR6239_c0_g1	0.0733067954007043	0.444274521001408	0.666666666666667
GO:0044703	multi-organism reproductive process	BP	2	3	270	1627	TR591_c0_g1,TR420_c0_g1	0.0733067954007043	0.444274521001408	0.666666666666667
GO:0048285	organelle fission	BP	2	3	270	1627	TR1163_c0_g2,TR5275_c0_g1	0.0733067954007043	0.444274521001408	0.666666666666667
GO:0048468	cell development	BP	2	3	270	1627	TR420_c0_g1,TR591_c0_g1	0.0733067954007043	0.444274521001408	0.666666666666667
GO:0072350	tricarboxylic acid metabolic process	BP	2	3	270	1627	TR38_c0_g2,TR283_c0_g1	0.0733067954007043	0.444274521001408	0.666666666666667
GO:0004129	cytochrome-c oxidase activity	MF	2	3	270	1627	TR547_c0_g3,TR7064_c0_g1	0.0733067954007043	0.444274521001408	0.666666666666667
GO:0015002	heme-copper terminal oxidase activity	MF	2	3	270	1627	TR547_c0_g3,TR7064_c0_g1	0.0733067954007043	0.444274521001408	0.666666666666667
GO:0016675	oxidoreductase activity, acting on a heme group of donors	MF	2	3	270	1627	TR547_c0_g3,TR7064_c0_g1	0.0733067954007043	0.444274521001408	0.666666666666667
GO:0016676	oxidoreductase activity, acting on a heme group of donors, oxygen as acceptor	MF	2	3	270	1627	TR547_c0_g3,TR7064_c0_g1	0.0733067954007043	0.444274521001408	0.666666666666667
GO:0000790	nuclear chromatin	CC	2	3	270	1627	TR1202_c0_g1,TR10975_c0_g1	0.0733067954007043	0.444274521001408	0.666666666666667
GO:0005874	microtubule	CC	2	3	270	1627	TR420_c0_g1,TR420_c0_g2	0.0733067954007043	0.444274521001408	0.666666666666667
GO:0005938	cell cortex	CC	2	3	270	1627	TR635_c0_g1,TR4270_c0_g1	0.0733067954007043	0.444274521001408	0.666666666666667
GO:0032155	cell division site part	CC	2	3	270	1627	TR4270_c0_g1,TR635_c0_g1	0.0733067954007043	0.444274521001408	0.666666666666667
GO:0044448	cell cortex part	CC	2	3	270	1627	TR4270_c0_g1,TR635_c0_g1	0.0733067954007043	0.444274521001408	0.666666666666667
GO:0099080	supramolecular complex	CC	2	3	270	1627	TR420_c0_g1,TR420_c0_g2	0.0733067954007043	0.444274521001408	0.666666666666667
GO:0099081	supramolecular polymer	CC	2	3	270	1627	TR420_c0_g1,TR420_c0_g2	0.0733067954007043	0.444274521001408	0.666666666666667
GO:0099512	supramolecular fiber	CC	2	3	270	1627	TR420_c0_g1,TR420_c0_g2	0.0733067954007043	0.444274521001408	0.666666666666667
GO:0099513	polymeric cytoskeletal fiber	CC	2	3	270	1627	TR420_c0_g1,TR420_c0_g2	0.0733067954007043	0.444274521001408	0.666666666666667
GO:0099568	cytoplasmic region	CC	2	3	270	1627	TR635_c0_g1,TR4270_c0_g1	0.0733067954007043	0.444274521001408	0.666666666666667
GO:0005515	protein binding	MF	12	47	270	1627	TR8106_c0_g1,TR591_c0_g1,TR3991_c0_g1,TR264_c1_g3,TR264_c1_g4,TR14438_c0_g1,TR4761_c0_g1,TR4839_c0_g1,TR4270_c0_g1,TR1738_c0_g1,TR24_c2_g1,TR2955_c0_g1	0.0756137545521861	0.444274521001408	0.25531914893617
GO:0031090	organelle membrane	CC	6	19	270	1627	TR10464_c0_g1,TR547_c0_g3,TR6239_c0_g1,TR14438_c0_g1,TR1758_c0_g1,TR18062_c0_g1	0.0798285481207092	0.444274521001408	0.315789473684211
GO:0043231	intracellular membrane-bounded organelle	CC	31	148	270	1627	TR7064_c0_g1,TR7166_c0_g1,TR83_c0_g1,TR10320_c0_g1,TR1163_c0_g2,TR1738_c0_g1,TR18062_c0_g1,TR1817_c0_g1,TR2861_c0_g1,TR2890_c0_g1,TR3991_c0_g1,TR4378_c0_g1,TR5095_c0_g1,TR5275_c0_g1,TR8106_c0_g1,TR10278_c0_g1,TR1440_c0_g1,TR1758_c0_g1,TR849_c0_g1,TR3622_c0_g1,TR10464_c0_g1,TR547_c0_g3,TR6239_c0_g1,TR10975_c0_g1,TR4839_c0_g1,TR2699_c0_g1,TR1202_c0_g1,TR14438_c0_g1,TR4761_c0_g1,TR13706_c0_g1,TR3246…	0.0868726061390584	0.444274521001408	0.209459459459459
GO:0098655	cation transmembrane transport	BP	5	15	270	1627	TR4697_c0_g1,TR547_c0_g3,TR7064_c0_g1,TR10464_c0_g1,TR1758_c0_g1	0.087469093219058	0.444274521001408	0.333333333333333
GO:0008168	methyltransferase activity	MF	5	15	270	1627	TR14912_c0_g1,TR3940_c0_g1,TR1343_c0_g1,TR4856_c1_g1,TR5212_c0_g1	0.087469093219058	0.444274521001408	0.333333333333333
GO:0016746	transferase activity, transferring acyl groups	MF	7	24	270	1627	TR38_c0_g2,TR6136_c0_g1,TR1419_c0_g1,TR283_c0_g1,TR11224_c0_g1,TR1568_c0_g1,TR780_c0_g1	0.087938273064976	0.444274521001408	0.291666666666667
GO:0016192	vesicle-mediated transport	BP	4	11	270	1627	TR14438_c0_g1,TR18062_c0_g1,TR4761_c0_g1,TR3971_c0_g1	0.0936493759644567	0.444274521001408	0.363636363636364
GO:0005740	mitochondrial envelope	CC	4	11	270	1627	TR10464_c0_g1,TR547_c0_g3,TR6239_c0_g1,TR3622_c0_g1	0.0936493759644567	0.444274521001408	0.363636363636364
GO:0044429	mitochondrial part	CC	4	11	270	1627	TR3622_c0_g1,TR10464_c0_g1,TR547_c0_g3,TR6239_c0_g1	0.0936493759644567	0.444274521001408	0.363636363636364
GO:0000278	mitotic cell cycle	BP	3	7	270	1627	TR4270_c0_g1,TR5275_c0_g1,TR635_c0_g1	0.0943363156579665	0.444274521001408	0.428571428571429
GO:0006511	ubiquitin-dependent protein catabolic process	BP	3	7	270	1627	TR4378_c0_g1,TR1589_c0_g1,TR12937_c0_g1	0.0943363156579665	0.444274521001408	0.428571428571429
GO:0019941	modification-dependent protein catabolic process	BP	3	7	270	1627	TR1589_c0_g1,TR12937_c0_g1,TR4378_c0_g1	0.0943363156579665	0.444274521001408	0.428571428571429
GO:0030163	protein catabolic process	BP	3	7	270	1627	TR1589_c0_g1,TR12937_c0_g1,TR4378_c0_g1	0.0943363156579665	0.444274521001408	0.428571428571429
GO:0044257	cellular protein catabolic process	BP	3	7	270	1627	TR1589_c0_g1,TR12937_c0_g1,TR4378_c0_g1	0.0943363156579665	0.444274521001408	0.428571428571429
GO:0051603	proteolysis involved in cellular protein catabolic process	BP	3	7	270	1627	TR1589_c0_g1,TR12937_c0_g1,TR4378_c0_g1	0.0943363156579665	0.444274521001408	0.428571428571429
GO:1903047	mitotic cell cycle process	BP	3	7	270	1627	TR4270_c0_g1,TR5275_c0_g1,TR635_c0_g1	0.0943363156579665	0.444274521001408	0.428571428571429
GO:0005507	copper ion binding	MF	3	7	270	1627	TR16469_c0_g1,TR2262_c0_g1,TR971_c0_g1	0.0943363156579665	0.444274521001408	0.428571428571429
GO:0016638	oxidoreductase activity, acting on the CH-NH2 group of donors	MF	3	7	270	1627	TR16469_c0_g1,TR2262_c0_g1,TR971_c0_g1	0.0943363156579665	0.444274521001408	0.428571428571429
GO:0000785	chromatin	CC	3	7	270	1627	TR1738_c0_g1,TR10975_c0_g1,TR1202_c0_g1	0.0943363156579665	0.444274521001408	0.428571428571429
GO:0005743	mitochondrial inner membrane	CC	3	7	270	1627	TR10464_c0_g1,TR547_c0_g3,TR6239_c0_g1	0.0943363156579665	0.444274521001408	0.428571428571429
GO:0019866	organelle inner membrane	CC	3	7	270	1627	TR10464_c0_g1,TR547_c0_g3,TR6239_c0_g1	0.0943363156579665	0.444274521001408	0.428571428571429
GO:0098805	whole membrane	CC	3	7	270	1627	TR14438_c0_g1,TR1758_c0_g1,TR18062_c0_g1	0.0943363156579665	0.444274521001408	0.428571428571429
GO:0043227	membrane-bounded organelle	CC	31	150	270	1627	TR13706_c0_g1,TR3246_c0_g1,TR7064_c0_g1,TR7166_c0_g1,TR83_c0_g1,TR10320_c0_g1,TR1163_c0_g2,TR1738_c0_g1,TR18062_c0_g1,TR1817_c0_g1,TR2861_c0_g1,TR2890_c0_g1,TR3991_c0_g1,TR4378_c0_g1,TR5095_c0_g1,TR5275_c0_g1,TR8106_c0_g1,TR10278_c0_g1,TR1440_c0_g1,TR1758_c0_g1,TR849_c0_g1,TR14438_c0_g1,TR10464_c0_g1,TR547_c0_g3,TR6239_c0_g1,TR4839_c0_g1,TR3622_c0_g1,TR10975_c0_g1,TR2699_c0_g1,TR1202_c0_g1,TR4761…	0.10030694040043	0.444274521001408	0.206666666666667
GO:0070011	peptidase activity, acting on L-amino acid peptides	MF	6	21	270	1627	TR2813_c0_g1,TR1589_c0_g1,TR4857_c0_g1,TR1091_c0_g1,TR12937_c0_g1,TR4378_c0_g1	0.12006559381357	0.444274521001408	0.285714285714286
GO:0032259	methylation	BP	4	12	270	1627	TR4856_c1_g1,TR1343_c0_g1,TR3940_c0_g1,TR5212_c0_g1	0.122885212189082	0.444274521001408	0.333333333333333
GO:0005856	cytoskeleton	CC	4	12	270	1627	TR635_c0_g1,TR4270_c0_g1,TR420_c0_g1,TR420_c0_g2	0.122885212189082	0.444274521001408	0.333333333333333
GO:0044430	cytoskeletal part	CC	4	12	270	1627	TR4270_c0_g1,TR420_c0_g1,TR420_c0_g2,TR635_c0_g1	0.122885212189082	0.444274521001408	0.333333333333333
GO:0005198	structural molecule activity	MF	7	26	270	1627	TR1973_c0_g1,TR365_c0_g2,TR4317_c0_g1,TR709_c0_g1,TR420_c0_g1,TR420_c0_g2,TR4270_c0_g1	0.125070680344091	0.444274521001408	0.269230769230769
GO:0008233	peptidase activity	MF	7	26	270	1627	TR2813_c0_g1,TR1589_c0_g1,TR4857_c0_g1,TR1091_c0_g1,TR12937_c0_g1,TR4378_c0_g1,TR2858_c0_g1	0.125070680344091	0.444274521001408	0.269230769230769
GO:0005829	cytosol	CC	10	41	270	1627	TR4378_c0_g1,TR1008_c1_g1,TR1589_c0_g1,TR1758_c0_g1,TR18062_c0_g1,TR1817_c0_g1,TR2861_c0_g1,TR3800_c0_g1,TR4317_c0_g1,TR4839_c0_g1	0.127665671299675	0.444274521001408	0.24390243902439
GO:0000910	cytokinesis	BP	2	4	270	1627	TR4270_c0_g1,TR635_c0_g1	0.130735543836449	0.444274521001408	0.5
GO:0010498	proteasomal protein catabolic process	BP	2	4	270	1627	TR4378_c0_g1,TR1589_c0_g1	0.130735543836449	0.444274521001408	0.5
GO:0022900	electron transport chain	BP	2	4	270	1627	TR7064_c0_g1,TR6239_c0_g1	0.130735543836449	0.444274521001408	0.5
GO:0071214	cellular response to abiotic stimulus	BP	2	4	270	1627	TR1817_c0_g1,TR3246_c0_g1	0.130735543836449	0.444274521001408	0.5
GO:0098869	cellular oxidant detoxification	BP	2	4	270	1627	TR16620_c0_g1,TR16623_c0_g1	0.130735543836449	0.444274521001408	0.5
GO:0104004	cellular response to environmental stimulus	BP	2	4	270	1627	TR1817_c0_g1,TR3246_c0_g1	0.130735543836449	0.444274521001408	0.5
GO:0009055	electron transfer activity	MF	2	4	270	1627	TR547_c0_g3,TR7064_c0_g1	0.130735543836449	0.444274521001408	0.5
GO:0016209	antioxidant activity	MF	2	4	270	1627	TR16620_c0_g1,TR16623_c0_g1	0.130735543836449	0.444274521001408	0.5
GO:0016684	oxidoreductase activity, acting on peroxide as acceptor	MF	2	4	270	1627	TR16620_c0_g1,TR16623_c0_g1	0.130735543836449	0.444274521001408	0.5
GO:0042802	identical protein binding	MF	2	4	270	1627	TR14438_c0_g1,TR4761_c0_g1	0.130735543836449	0.444274521001408	0.5
GO:0015935	small ribosomal subunit	CC	2	4	270	1627	TR4317_c0_g1,TR709_c0_g1	0.130735543836449	0.444274521001408	0.5
GO:0044391	ribosomal subunit	CC	2	4	270	1627	TR4317_c0_g1,TR709_c0_g1	0.130735543836449	0.444274521001408	0.5
GO:0000003	reproduction	BP	3	8	270	1627	TR591_c0_g1,TR1163_c0_g2,TR420_c0_g1	0.133022023063873	0.444274521001408	0.375
GO:0010604	positive regulation of macromolecule metabolic process	BP	3	8	270	1627	TR4270_c0_g1,TR10975_c0_g1,TR3246_c0_g1	0.133022023063873	0.444274521001408	0.375
GO:0022414	reproductive process	BP	3	8	270	1627	TR591_c0_g1,TR1163_c0_g2,TR420_c0_g1	0.133022023063873	0.444274521001408	0.375
GO:0051173	positive regulation of nitrogen compound metabolic process	BP	3	8	270	1627	TR4270_c0_g1,TR10975_c0_g1,TR591_c0_g1	0.133022023063873	0.444274521001408	0.375
GO:0005794	Golgi apparatus	CC	3	8	270	1627	TR14438_c0_g1,TR18062_c0_g1,TR4761_c0_g1	0.133022023063873	0.444274521001408	0.375
GO:0022890	inorganic cation transmembrane transporter activity	MF	5	17	270	1627	TR1758_c0_g1,TR547_c0_g3,TR7064_c0_g1,TR10464_c0_g1,TR4697_c0_g1	0.136621686727948	0.444274521001408	0.294117647058824
GO:0005739	mitochondrion	CC	7	27	270	1627	TR3622_c0_g1,TR10464_c0_g1,TR547_c0_g3,TR6239_c0_g1,TR7064_c0_g1,TR7166_c0_g1,TR83_c0_g1	0.146200345825614	0.444274521001408	0.259259259259259
GO:0016999	antibiotic metabolic process	BP	4	13	270	1627	TR3335_c0_g1,TR38_c0_g2,TR283_c0_g1,TR591_c0_g1	0.155445908219644	0.444274521001408	0.307692307692308
GO:0098796	membrane protein complex	CC	4	13	270	1627	TR3971_c0_g1,TR1758_c0_g1,TR591_c0_g1,TR18062_c0_g1	0.155445908219644	0.444274521001408	0.307692307692308
GO:0043228	non-membrane-bounded organelle	CC	14	64	270	1627	TR3093_c0_g1,TR1973_c0_g1,TR2704_c0_g1,TR365_c0_g2,TR635_c0_g1,TR4270_c0_g1,TR420_c0_g1,TR420_c0_g2,TR10975_c0_g1,TR1202_c0_g1,TR4317_c0_g1,TR709_c0_g1,TR1738_c0_g1,TR1817_c0_g1	0.161175808662175	0.444274521001408	0.21875
GO:0043232	intracellular non-membrane-bounded organelle	CC	14	64	270	1627	TR1973_c0_g1,TR2704_c0_g1,TR365_c0_g2,TR635_c0_g1,TR4270_c0_g1,TR420_c0_g1,TR420_c0_g2,TR10975_c0_g1,TR1202_c0_g1,TR4317_c0_g1,TR709_c0_g1,TR1738_c0_g1,TR1817_c0_g1,TR3093_c0_g1	0.161175808662175	0.444274521001408	0.21875
GO:0000070	mitotic sister chromatid segregation	BP	1	1	270	1627	TR5275_c0_g1	0.165949600491702	0.444274521001408	1
GO:0000722	telomere maintenance via recombination	BP	1	1	270	1627	TR10975_c0_g1	0.165949600491702	0.444274521001408	1
GO:0000723	telomere maintenance	BP	1	1	270	1627	TR10975_c0_g1	0.165949600491702	0.444274521001408	1
GO:0000909	sporocarp development involved in sexual reproduction	BP	1	1	270	1627	TR591_c0_g1	0.165949600491702	0.444274521001408	1
GO:0000912	assembly of actomyosin apparatus involved in cytokinesis	BP	1	1	270	1627	TR635_c0_g1	0.165949600491702	0.444274521001408	1
GO:0000915	actomyosin contractile ring assembly	BP	1	1	270	1627	TR635_c0_g1	0.165949600491702	0.444274521001408	1
GO:0000921	septin ring assembly	BP	1	1	270	1627	TR4270_c0_g1	0.165949600491702	0.444274521001408	1
GO:0001934	positive regulation of protein phosphorylation	BP	1	1	270	1627	TR4270_c0_g1	0.165949600491702	0.444274521001408	1
GO:0006097	glyoxylate cycle	BP	1	1	270	1627	TR38_c0_g2	0.165949600491702	0.444274521001408	1
GO:0006312	mitotic recombination	BP	1	1	270	1627	TR10975_c0_g1	0.165949600491702	0.444274521001408	1
GO:0006378	mRNA polyadenylation	BP	1	1	270	1627	TR2699_c0_g1	0.165949600491702	0.444274521001408	1
GO:0006436	tryptophanyl-tRNA aminoacylation	BP	1	1	270	1627	TR1386_c0_g1	0.165949600491702	0.444274521001408	1
GO:0006564	L-serine biosynthetic process	BP	1	1	270	1627	TR3800_c0_g1	0.165949600491702	0.444274521001408	1
GO:0006857	oligopeptide transport	BP	1	1	270	1627	TR1136_c0_g1	0.165949600491702	0.444274521001408	1
GO:0006890	retrograde vesicle-mediated transport, Golgi to ER	BP	1	1	270	1627	TR18062_c0_g1	0.165949600491702	0.444274521001408	1
GO:0006891	intra-Golgi vesicle-mediated transport	BP	1	1	270	1627	TR4761_c0_g1	0.165949600491702	0.444274521001408	1
GO:0006906	vesicle fusion	BP	1	1	270	1627	TR14438_c0_g1	0.165949600491702	0.444274521001408	1
GO:0007035	vacuolar acidification	BP	1	1	270	1627	TR1758_c0_g1	0.165949600491702	0.444274521001408	1
GO:0007088	regulation of mitotic nuclear division	BP	1	1	270	1627	TR5275_c0_g1	0.165949600491702	0.444274521001408	1
GO:0007091	metaphase/anaphase transition of mitotic cell cycle	BP	1	1	270	1627	TR5275_c0_g1	0.165949600491702	0.444274521001408	1
GO:0007127	meiosis I	BP	1	1	270	1627	TR1163_c0_g2	0.165949600491702	0.444274521001408	1
GO:0007131	reciprocal meiotic recombination	BP	1	1	270	1627	TR1163_c0_g2	0.165949600491702	0.444274521001408	1
GO:0007163	establishment or maintenance of cell polarity	BP	1	1	270	1627	TR4270_c0_g1	0.165949600491702	0.444274521001408	1
GO:0007186	G protein-coupled receptor signaling pathway	BP	1	1	270	1627	TR591_c0_g1	0.165949600491702	0.444274521001408	1
GO:0007187	G protein-coupled receptor signaling pathway, coupled to cyclic nucleotide second messenger	BP	1	1	270	1627	TR591_c0_g1	0.165949600491702	0.444274521001408	1
GO:0007188	adenylate cyclase-modulating G protein-coupled receptor signaling pathway	BP	1	1	270	1627	TR591_c0_g1	0.165949600491702	0.444274521001408	1
GO:0007189	adenylate cyclase-activating G protein-coupled receptor signaling pathway	BP	1	1	270	1627	TR591_c0_g1	0.165949600491702	0.444274521001408	1
GO:0009403	toxin biosynthetic process	BP	1	1	270	1627	TR591_c0_g1	0.165949600491702	0.444274521001408	1
GO:0009404	toxin metabolic process	BP	1	1	270	1627	TR591_c0_g1	0.165949600491702	0.444274521001408	1
GO:0009439	cyanate metabolic process	BP	1	1	270	1627	TR4768_c0_g1	0.165949600491702	0.444274521001408	1
GO:0009712	catechol-containing compound metabolic process	BP	1	1	270	1627	TR18385_c0_g1	0.165949600491702	0.444274521001408	1
GO:0010256	endomembrane system organization	BP	1	1	270	1627	TR849_c0_g1	0.165949600491702	0.444274521001408	1
GO:0010499	proteasomal ubiquitin-independent protein catabolic process	BP	1	1	270	1627	TR4378_c0_g1	0.165949600491702	0.444274521001408	1
GO:0010562	positive regulation of phosphorus metabolic process	BP	1	1	270	1627	TR4270_c0_g1	0.165949600491702	0.444274521001408	1
GO:0010565	regulation of cellular ketone metabolic process	BP	1	1	270	1627	TR591_c0_g1	0.165949600491702	0.444274521001408	1
GO:0010913	regulation of sterigmatocystin biosynthetic process	BP	1	1	270	1627	TR591_c0_g1	0.165949600491702	0.444274521001408	1
GO:0010965	regulation of mitotic sister chromatid separation	BP	1	1	270	1627	TR5275_c0_g1	0.165949600491702	0.444274521001408	1
GO:0015988	energy coupled proton transmembrane transport, against electrochemical gradient	BP	1	1	270	1627	TR1758_c0_g1	0.165949600491702	0.444274521001408	1
GO:0015991	ATP hydrolysis coupled proton transport	BP	1	1	270	1627	TR1758_c0_g1	0.165949600491702	0.444274521001408	1
GO:0016579	protein deubiquitination	BP	1	1	270	1627	TR12937_c0_g1	0.165949600491702	0.444274521001408	1
GO:0017000	antibiotic biosynthetic process	BP	1	1	270	1627	TR591_c0_g1	0.165949600491702	0.444274521001408	1
GO:0018958	phenol-containing compound metabolic process	BP	1	1	270	1627	TR18385_c0_g1	0.165949600491702	0.444274521001408	1
GO:0019933	cAMP-mediated signaling	BP	1	1	270	1627	TR591_c0_g1	0.165949600491702	0.444274521001408	1
GO:0019935	cyclic-nucleotide-mediated signaling	BP	1	1	270	1627	TR591_c0_g1	0.165949600491702	0.444274521001408	1
GO:0022406	membrane docking	BP	1	1	270	1627	TR14438_c0_g1	0.165949600491702	0.444274521001408	1
GO:0022413	reproductive process in single-celled organism	BP	1	1	270	1627	TR420_c0_g1	0.165949600491702	0.444274521001408	1
GO:0030011	maintenance of cell polarity	BP	1	1	270	1627	TR4270_c0_g1	0.165949600491702	0.444274521001408	1
GO:0030071	regulation of mitotic metaphase/anaphase transition	BP	1	1	270	1627	TR5275_c0_g1	0.165949600491702	0.444274521001408	1
GO:0030435	sporulation resulting in formation of a cellular spore	BP	1	1	270	1627	TR420_c0_g1	0.165949600491702	0.444274521001408	1
GO:0030436	asexual sporulation	BP	1	1	270	1627	TR591_c0_g1	0.165949600491702	0.444274521001408	1
GO:0030437	ascospore formation	BP	1	1	270	1627	TR420_c0_g1	0.165949600491702	0.444274521001408	1
GO:0030582	reproductive fruiting body development	BP	1	1	270	1627	TR591_c0_g1	0.165949600491702	0.444274521001408	1
GO:0030584	sporocarp development	BP	1	1	270	1627	TR591_c0_g1	0.165949600491702	0.444274521001408	1
GO:0030654	beta-lactam antibiotic biosynthetic process	BP	1	1	270	1627	TR591_c0_g1	0.165949600491702	0.444274521001408	1
GO:0030865	cortical cytoskeleton organization	BP	1	1	270	1627	TR635_c0_g1	0.165949600491702	0.444274521001408	1
GO:0030866	cortical actin cytoskeleton organization	BP	1	1	270	1627	TR635_c0_g1	0.165949600491702	0.444274521001408	1
GO:0031032	actomyosin structure organization	BP	1	1	270	1627	TR635_c0_g1	0.165949600491702	0.444274521001408	1
GO:0031106	septin ring organization	BP	1	1	270	1627	TR4270_c0_g1	0.165949600491702	0.444274521001408	1
GO:0031124	mRNA 3'-end processing	BP	1	1	270	1627	TR2699_c0_g1	0.165949600491702	0.444274521001408	1
GO:0031401	positive regulation of protein modification process	BP	1	1	270	1627	TR4270_c0_g1	0.165949600491702	0.444274521001408	1
GO:0032185	septin cytoskeleton organization	BP	1	1	270	1627	TR4270_c0_g1	0.165949600491702	0.444274521001408	1
GO:0032200	telomere organization	BP	1	1	270	1627	TR10975_c0_g1	0.165949600491702	0.444274521001408	1
GO:0032258	protein localization by the Cvt pathway	BP	1	1	270	1627	TR4761_c0_g1	0.165949600491702	0.444274521001408	1
GO:0033045	regulation of sister chromatid segregation	BP	1	1	270	1627	TR5275_c0_g1	0.165949600491702	0.444274521001408	1
GO:0033047	regulation of mitotic sister chromatid segregation	BP	1	1	270	1627	TR5275_c0_g1	0.165949600491702	0.444274521001408	1
GO:0033238	regulation of cellular amine metabolic process	BP	1	1	270	1627	TR591_c0_g1	0.165949600491702	0.444274521001408	1
GO:0033240	positive regulation of cellular amine metabolic process	BP	1	1	270	1627	TR591_c0_g1	0.165949600491702	0.444274521001408	1
GO:0033244	regulation of penicillin metabolic process	BP	1	1	270	1627	TR591_c0_g1	0.165949600491702	0.444274521001408	1
GO:0033246	positive regulation of penicillin metabolic process	BP	1	1	270	1627	TR591_c0_g1	0.165949600491702	0.444274521001408	1
GO:0033674	positive regulation of kinase activity	BP	1	1	270	1627	TR4270_c0_g1	0.165949600491702	0.444274521001408	1
GO:0034250	positive regulation of cellular amide metabolic process	BP	1	1	270	1627	TR591_c0_g1	0.165949600491702	0.444274521001408	1
GO:0034293	sexual sporulation	BP	1	1	270	1627	TR420_c0_g1	0.165949600491702	0.444274521001408	1
GO:0034305	regulation of asexual sporulation	BP	1	1	270	1627	TR591_c0_g1	0.165949600491702	0.444274521001408	1
GO:0034599	cellular response to oxidative stress	BP	1	1	270	1627	TR3246_c0_g1	0.165949600491702	0.444274521001408	1
GO:0035493	SNARE complex assembly	BP	1	1	270	1627	TR14438_c0_g1	0.165949600491702	0.444274521001408	1
GO:0035825	homologous recombination	BP	1	1	270	1627	TR1163_c0_g2	0.165949600491702	0.444274521001408	1
GO:0042316	penicillin metabolic process	BP	1	1	270	1627	TR591_c0_g1	0.165949600491702	0.444274521001408	1
GO:0042318	penicillin biosynthetic process	BP	1	1	270	1627	TR591_c0_g1	0.165949600491702	0.444274521001408	1
GO:0042327	positive regulation of phosphorylation	BP	1	1	270	1627	TR4270_c0_g1	0.165949600491702	0.444274521001408	1
GO:0042762	regulation of sulfur metabolic process	BP	1	1	270	1627	TR591_c0_g1	0.165949600491702	0.444274521001408	1
GO:0042773	ATP synthesis coupled electron transport	BP	1	1	270	1627	TR6239_c0_g1	0.165949600491702	0.444274521001408	1
GO:0042938	dipeptide transport	BP	1	1	270	1627	TR1136_c0_g1	0.165949600491702	0.444274521001408	1
GO:0043385	mycotoxin metabolic process	BP	1	1	270	1627	TR591_c0_g1	0.165949600491702	0.444274521001408	1
GO:0043386	mycotoxin biosynthetic process	BP	1	1	270	1627	TR591_c0_g1	0.165949600491702	0.444274521001408	1
GO:0043455	regulation of secondary metabolic process	BP	1	1	270	1627	TR591_c0_g1	0.165949600491702	0.444274521001408	1
GO:0043631	RNA polyadenylation	BP	1	1	270	1627	TR2699_c0_g1	0.165949600491702	0.444274521001408	1
GO:0043935	sexual sporulation resulting in formation of a cellular spore	BP	1	1	270	1627	TR420_c0_g1	0.165949600491702	0.444274521001408	1
GO:0043937	regulation of sporulation	BP	1	1	270	1627	TR591_c0_g1	0.165949600491702	0.444274521001408	1
GO:0044784	metaphase/anaphase transition of cell cycle	BP	1	1	270	1627	TR5275_c0_g1	0.165949600491702	0.444274521001408	1
GO:0044837	actomyosin contractile ring organization	BP	1	1	270	1627	TR635_c0_g1	0.165949600491702	0.444274521001408	1
GO:0045460	sterigmatocystin metabolic process	BP	1	1	270	1627	TR591_c0_g1	0.165949600491702	0.444274521001408	1
GO:0045461	sterigmatocystin biosynthetic process	BP	1	1	270	1627	TR591_c0_g1	0.165949600491702	0.444274521001408	1
GO:0045595	regulation of cell differentiation	BP	1	1	270	1627	TR591_c0_g1	0.165949600491702	0.444274521001408	1
GO:0045851	pH reduction	BP	1	1	270	1627	TR1758_c0_g1	0.165949600491702	0.444274521001408	1
GO:0045860	positive regulation of protein kinase activity	BP	1	1	270	1627	TR4270_c0_g1	0.165949600491702	0.444274521001408	1
GO:0045937	positive regulation of phosphate metabolic process	BP	1	1	270	1627	TR4270_c0_g1	0.165949600491702	0.444274521001408	1
GO:0046487	glyoxylate metabolic process	BP	1	1	270	1627	TR38_c0_g2	0.165949600491702	0.444274521001408	1
GO:0048211	Golgi vesicle docking	BP	1	1	270	1627	TR14438_c0_g1	0.165949600491702	0.444274521001408	1
GO:0048278	vesicle docking	BP	1	1	270	1627	TR14438_c0_g1	0.165949600491702	0.444274521001408	1
GO:0048280	vesicle fusion with Golgi apparatus	BP	1	1	270	1627	TR14438_c0_g1	0.165949600491702	0.444274521001408	1
GO:0048284	organelle fusion	BP	1	1	270	1627	TR14438_c0_g1	0.165949600491702	0.444274521001408	1
GO:0048315	conidium formation	BP	1	1	270	1627	TR591_c0_g1	0.165949600491702	0.444274521001408	1
GO:0048608	reproductive structure development	BP	1	1	270	1627	TR591_c0_g1	0.165949600491702	0.444274521001408	1
GO:0051176	positive regulation of sulfur metabolic process	BP	1	1	270	1627	TR591_c0_g1	0.165949600491702	0.444274521001408	1
GO:0051304	chromosome separation	BP	1	1	270	1627	TR5275_c0_g1	0.165949600491702	0.444274521001408	1
GO:0051306	mitotic sister chromatid separation	BP	1	1	270	1627	TR5275_c0_g1	0.165949600491702	0.444274521001408	1
GO:0051347	positive regulation of transferase activity	BP	1	1	270	1627	TR4270_c0_g1	0.165949600491702	0.444274521001408	1
GO:0051452	intracellular pH reduction	BP	1	1	270	1627	TR1758_c0_g1	0.165949600491702	0.444274521001408	1
GO:0051783	regulation of nuclear division	BP	1	1	270	1627	TR5275_c0_g1	0.165949600491702	0.444274521001408	1
GO:0051983	regulation of chromosome segregation	BP	1	1	270	1627	TR5275_c0_g1	0.165949600491702	0.444274521001408	1
GO:0055081	anion homeostasis	BP	1	1	270	1627	TR1758_c0_g1	0.165949600491702	0.444274521001408	1
GO:0060249	anatomical structure homeostasis	BP	1	1	270	1627	TR10975_c0_g1	0.165949600491702	0.444274521001408	1
GO:0060284	regulation of cell development	BP	1	1	270	1627	TR591_c0_g1	0.165949600491702	0.444274521001408	1
GO:0061025	membrane fusion	BP	1	1	270	1627	TR14438_c0_g1	0.165949600491702	0.444274521001408	1
GO:0061458	reproductive system development	BP	1	1	270	1627	TR591_c0_g1	0.165949600491702	0.444274521001408	1
GO:0061794	conidium development	BP	1	1	270	1627	TR591_c0_g1	0.165949600491702	0.444274521001408	1
GO:0061982	meiosis I cell cycle process	BP	1	1	270	1627	TR1163_c0_g2	0.165949600491702	0.444274521001408	1
GO:0062013	positive regulation of small molecule metabolic process	BP	1	1	270	1627	TR591_c0_g1	0.165949600491702	0.444274521001408	1
GO:0072339	cellular lactam biosynthetic process	BP	1	1	270	1627	TR591_c0_g1	0.165949600491702	0.444274521001408	1
GO:0075259	spore-bearing structure development	BP	1	1	270	1627	TR591_c0_g1	0.165949600491702	0.444274521001408	1
GO:0075306	regulation of conidium formation	BP	1	1	270	1627	TR591_c0_g1	0.165949600491702	0.444274521001408	1
GO:0080129	proteasome core complex assembly	BP	1	1	270	1627	TR4378_c0_g1	0.165949600491702	0.444274521001408	1
GO:0080144	amino acid homeostasis	BP	1	1	270	1627	TR1758_c0_g1	0.165949600491702	0.444274521001408	1
GO:0090174	organelle membrane fusion	BP	1	1	270	1627	TR14438_c0_g1	0.165949600491702	0.444274521001408	1
GO:0090463	lysine homeostasis	BP	1	1	270	1627	TR1758_c0_g1	0.165949600491702	0.444274521001408	1
GO:0090464	histidine homeostasis	BP	1	1	270	1627	TR1758_c0_g1	0.165949600491702	0.444274521001408	1
GO:0090465	arginine homeostasis	BP	1	1	270	1627	TR1758_c0_g1	0.165949600491702	0.444274521001408	1
GO:0090662	ATP hydrolysis coupled transmembrane transport	BP	1	1	270	1627	TR1758_c0_g1	0.165949600491702	0.444274521001408	1
GO:0099131	ATP hydrolysis coupled ion transmembrane transport	BP	1	1	270	1627	TR1758_c0_g1	0.165949600491702	0.444274521001408	1
GO:0099132	ATP hydrolysis coupled cation transmembrane transport	BP	1	1	270	1627	TR1758_c0_g1	0.165949600491702	0.444274521001408	1
GO:0140013	meiotic nuclear division	BP	1	1	270	1627	TR1163_c0_g2	0.165949600491702	0.444274521001408	1
GO:0140014	mitotic nuclear division	BP	1	1	270	1627	TR5275_c0_g1	0.165949600491702	0.444274521001408	1
GO:0140056	organelle localization by membrane tethering	BP	1	1	270	1627	TR14438_c0_g1	0.165949600491702	0.444274521001408	1
GO:1900196	regulation of penicillin biosynthetic process	BP	1	1	270	1627	TR591_c0_g1	0.165949600491702	0.444274521001408	1
GO:1900198	positive regulation of penicillin biosynthetic process	BP	1	1	270	1627	TR591_c0_g1	0.165949600491702	0.444274521001408	1
GO:1900376	regulation of secondary metabolite biosynthetic process	BP	1	1	270	1627	TR591_c0_g1	0.165949600491702	0.444274521001408	1
GO:1900378	positive regulation of secondary metabolite biosynthetic process	BP	1	1	270	1627	TR591_c0_g1	0.165949600491702	0.444274521001408	1
GO:1901376	organic heteropentacyclic compound metabolic process	BP	1	1	270	1627	TR591_c0_g1	0.165949600491702	0.444274521001408	1
GO:1901378	organic heteropentacyclic compound biosynthetic process	BP	1	1	270	1627	TR591_c0_g1	0.165949600491702	0.444274521001408	1
GO:1902099	regulation of metaphase/anaphase transition of cell cycle	BP	1	1	270	1627	TR5275_c0_g1	0.165949600491702	0.444274521001408	1
GO:1902275	regulation of chromatin organization	BP	1	1	270	1627	TR3246_c0_g1	0.165949600491702	0.444274521001408	1
GO:1902407	assembly of actomyosin apparatus involved in mitotic cytokinesis	BP	1	1	270	1627	TR635_c0_g1	0.165949600491702	0.444274521001408	1
GO:1902410	mitotic cytokinetic process	BP	1	1	270	1627	TR635_c0_g1	0.165949600491702	0.444274521001408	1
GO:1903475	mitotic actomyosin contractile ring assembly	BP	1	1	270	1627	TR635_c0_g1	0.165949600491702	0.444274521001408	1
GO:1903664	regulation of asexual reproduction	BP	1	1	270	1627	TR591_c0_g1	0.165949600491702	0.444274521001408	1
GO:1905818	regulation of chromosome separation	BP	1	1	270	1627	TR5275_c0_g1	0.165949600491702	0.444274521001408	1
GO:0000293	ferric-chelate reductase activity	MF	1	1	270	1627	TR4196_c0_g1	0.165949600491702	0.444274521001408	1
GO:0001664	G protein-coupled receptor binding	MF	1	1	270	1627	TR591_c0_g1	0.165949600491702	0.444274521001408	1
GO:0003696	satellite DNA binding	MF	1	1	270	1627	TR2861_c0_g1	0.165949600491702	0.444274521001408	1
GO:0003697	single-stranded DNA binding	MF	1	1	270	1627	TR2861_c0_g1	0.165949600491702	0.444274521001408	1
GO:0003729	mRNA binding	MF	1	1	270	1627	TR2699_c0_g1	0.165949600491702	0.444274521001408	1
GO:0003849	3-deoxy-7-phosphoheptulonate synthase activity	MF	1	1	270	1627	TR10328_c0_g1	0.165949600491702	0.444274521001408	1
GO:0004069	L-aspartate:2-oxoglutarate aminotransferase activity	MF	1	1	270	1627	TR4305_c0_g1	0.165949600491702	0.444274521001408	1
GO:0004180	carboxypeptidase activity	MF	1	1	270	1627	TR4857_c0_g1	0.165949600491702	0.444274521001408	1
GO:0004185	serine-type carboxypeptidase activity	MF	1	1	270	1627	TR4857_c0_g1	0.165949600491702	0.444274521001408	1
GO:0004198	calcium-dependent cysteine-type endopeptidase activity	MF	1	1	270	1627	TR1091_c0_g1	0.165949600491702	0.444274521001408	1
GO:0004252	serine-type endopeptidase activity	MF	1	1	270	1627	TR2813_c0_g1	0.165949600491702	0.444274521001408	1
GO:0004298	threonine-type endopeptidase activity	MF	1	1	270	1627	TR4378_c0_g1	0.165949600491702	0.444274521001408	1
GO:0004474	malate synthase activity	MF	1	1	270	1627	TR38_c0_g2	0.165949600491702	0.444274521001408	1
GO:0004648	O-phospho-L-serine:2-oxoglutarate aminotransferase activity	MF	1	1	270	1627	TR3800_c0_g1	0.165949600491702	0.444274521001408	1
GO:0004707	MAP kinase activity	MF	1	1	270	1627	TR3246_c0_g1	0.165949600491702	0.444274521001408	1
GO:0004830	tryptophan-tRNA ligase activity	MF	1	1	270	1627	TR1386_c0_g1	0.165949600491702	0.444274521001408	1
GO:0005545	1-phosphatidylinositol binding	MF	1	1	270	1627	TR4270_c0_g1	0.165949600491702	0.444274521001408	1
GO:0008199	ferric iron binding	MF	1	1	270	1627	TR18385_c0_g1	0.165949600491702	0.444274521001408	1
GO:0008553	proton-exporting ATPase activity, phosphorylative mechanism	MF	1	1	270	1627	TR1758_c0_g1	0.165949600491702	0.444274521001408	1
GO:0008677	2-dehydropantoate 2-reductase activity	MF	1	1	270	1627	TR5183_c0_g1	0.165949600491702	0.444274521001408	1
GO:0008793	aromatic-amino-acid:2-oxoglutarate aminotransferase activity	MF	1	1	270	1627	TR4305_c0_g1	0.165949600491702	0.444274521001408	1
GO:0008824	cyanate hydratase activity	MF	1	1	270	1627	TR4768_c0_g1	0.165949600491702	0.444274521001408	1
GO:0010314	phosphatidylinositol-5-phosphate binding	MF	1	1	270	1627	TR4270_c0_g1	0.165949600491702	0.444274521001408	1
GO:0015662	ATPase activity, coupled to transmembrane movement of ions, phosphorylative mechanism	MF	1	1	270	1627	TR1758_c0_g1	0.165949600491702	0.444274521001408	1
GO:0016278	lysine N-methyltransferase activity	MF	1	1	270	1627	TR4856_c1_g1	0.165949600491702	0.444274521001408	1
GO:0016279	protein-lysine N-methyltransferase activity	MF	1	1	270	1627	TR4856_c1_g1	0.165949600491702	0.444274521001408	1
GO:0016708	oxidoreductase activity, acting on paired donors, with incorporation or reduction of molecular oxygen, NAD(P)H as one donor, and incorporation of two atoms of oxygen into one donor	MF	1	1	270	1627	TR2607_c0_g1	0.165949600491702	0.444274521001408	1
GO:0016723	oxidoreductase activity, oxidizing metal ions, NAD or NADP as acceptor	MF	1	1	270	1627	TR4196_c0_g1	0.165949600491702	0.444274521001408	1
GO:0016765	transferase activity, transferring alkyl or aryl (other than methyl) groups	MF	1	1	270	1627	TR10328_c0_g1	0.165949600491702	0.444274521001408	1
GO:0016840	carbon-nitrogen lyase activity	MF	1	1	270	1627	TR4768_c0_g1	0.165949600491702	0.444274521001408	1
GO:0018024	histone-lysine N-methyltransferase activity	MF	1	1	270	1627	TR4856_c1_g1	0.165949600491702	0.444274521001408	1
GO:0018576	catechol 1,2-dioxygenase activity	MF	1	1	270	1627	TR18385_c0_g1	0.165949600491702	0.444274521001408	1
GO:0019114	catechol dioxygenase activity	MF	1	1	270	1627	TR18385_c0_g1	0.165949600491702	0.444274521001408	1
GO:0019783	ubiquitin-like protein-specific protease activity	MF	1	1	270	1627	TR12937_c0_g1	0.165949600491702	0.444274521001408	1
GO:0030196	cyanide hydratase activity	MF	1	1	270	1627	TR3332_c0_g1	0.165949600491702	0.444274521001408	1
GO:0031490	chromatin DNA binding	MF	1	1	270	1627	TR10975_c0_g1	0.165949600491702	0.444274521001408	1
GO:0031683	G-protein beta/gamma-subunit complex binding	MF	1	1	270	1627	TR591_c0_g1	0.165949600491702	0.444274521001408	1
GO:0032947	protein-containing complex scaffold activity	MF	1	1	270	1627	TR4270_c0_g1	0.165949600491702	0.444274521001408	1
GO:0035939	microsatellite binding	MF	1	1	270	1627	TR2861_c0_g1	0.165949600491702	0.444274521001408	1
GO:0036459	thiol-dependent ubiquitinyl hydrolase activity	MF	1	1	270	1627	TR12937_c0_g1	0.165949600491702	0.444274521001408	1
GO:0042054	histone methyltransferase activity	MF	1	1	270	1627	TR4856_c1_g1	0.165949600491702	0.444274521001408	1
GO:0042162	telomeric DNA binding	MF	1	1	270	1627	TR2861_c0_g1	0.165949600491702	0.444274521001408	1
GO:0043047	single-stranded telomeric DNA binding	MF	1	1	270	1627	TR2861_c0_g1	0.165949600491702	0.444274521001408	1
GO:0051537	2 iron, 2 sulfur cluster binding	MF	1	1	270	1627	TR2607_c0_g1	0.165949600491702	0.444274521001408	1
GO:0070003	threonine-type peptidase activity	MF	1	1	270	1627	TR4378_c0_g1	0.165949600491702	0.444274521001408	1
GO:0070008	serine-type exopeptidase activity	MF	1	1	270	1627	TR4857_c0_g1	0.165949600491702	0.444274521001408	1
GO:0070273	phosphatidylinositol-4-phosphate binding	MF	1	1	270	1627	TR4270_c0_g1	0.165949600491702	0.444274521001408	1
GO:0070546	L-phenylalanine aminotransferase activity	MF	1	1	270	1627	TR4305_c0_g1	0.165949600491702	0.444274521001408	1
GO:0080019	fatty-acyl-CoA reductase (alcohol-forming) activity	MF	1	1	270	1627	TR4424_c0_g1	0.165949600491702	0.444274521001408	1
GO:0080130	L-phenylalanine:2-oxoglutarate aminotransferase activity	MF	1	1	270	1627	TR4305_c0_g1	0.165949600491702	0.444274521001408	1
GO:0098847	sequence-specific single stranded DNA binding	MF	1	1	270	1627	TR2861_c0_g1	0.165949600491702	0.444274521001408	1
GO:0101005	ubiquitinyl hydrolase activity	MF	1	1	270	1627	TR12937_c0_g1	0.165949600491702	0.444274521001408	1
GO:1990605	GU repeat RNA binding	MF	1	1	270	1627	TR2861_c0_g1	0.165949600491702	0.444274521001408	1
GO:0000144	cellular bud neck septin ring	CC	1	1	270	1627	TR4270_c0_g1	0.165949600491702	0.444274521001408	1
GO:0000329	fungal-type vacuole membrane	CC	1	1	270	1627	TR1758_c0_g1	0.165949600491702	0.444274521001408	1
GO:0000399	cellular bud neck septin structure	CC	1	1	270	1627	TR4270_c0_g1	0.165949600491702	0.444274521001408	1
GO:0000408	EKC/KEOPS complex	CC	1	1	270	1627	TR10975_c0_g1	0.165949600491702	0.444274521001408	1
GO:0005774	vacuolar membrane	CC	1	1	270	1627	TR1758_c0_g1	0.165949600491702	0.444274521001408	1
GO:0005834	heterotrimeric G-protein complex	CC	1	1	270	1627	TR591_c0_g1	0.165949600491702	0.444274521001408	1
GO:0005849	mRNA cleavage factor complex	CC	1	1	270	1627	TR2699_c0_g1	0.165949600491702	0.444274521001408	1
GO:0005933	cellular bud	CC	1	1	270	1627	TR4270_c0_g1	0.165949600491702	0.444274521001408	1
GO:0005935	cellular bud neck	CC	1	1	270	1627	TR4270_c0_g1	0.165949600491702	0.444274521001408	1
GO:0005937	mating projection	CC	1	1	270	1627	TR4270_c0_g1	0.165949600491702	0.444274521001408	1
GO:0005940	septin ring	CC	1	1	270	1627	TR4270_c0_g1	0.165949600491702	0.444274521001408	1
GO:0012507	ER to Golgi transport vesicle membrane	CC	1	1	270	1627	TR14438_c0_g1	0.165949600491702	0.444274521001408	1
GO:0017119	Golgi transport complex	CC	1	1	270	1627	TR4761_c0_g1	0.165949600491702	0.444274521001408	1
GO:0019773	proteasome core complex, alpha-subunit complex	CC	1	1	270	1627	TR4378_c0_g1	0.165949600491702	0.444274521001408	1
GO:0019897	extrinsic component of plasma membrane	CC	1	1	270	1627	TR591_c0_g1	0.165949600491702	0.444274521001408	1
GO:0019898	extrinsic component of membrane	CC	1	1	270	1627	TR591_c0_g1	0.165949600491702	0.444274521001408	1
GO:0030118	clathrin coat	CC	1	1	270	1627	TR3971_c0_g1	0.165949600491702	0.444274521001408	1
GO:0030119	AP-type membrane coat adaptor complex	CC	1	1	270	1627	TR3971_c0_g1	0.165949600491702	0.444274521001408	1
GO:0030120	vesicle coat	CC	1	1	270	1627	TR18062_c0_g1	0.165949600491702	0.444274521001408	1
GO:0030126	COPI vesicle coat	CC	1	1	270	1627	TR18062_c0_g1	0.165949600491702	0.444274521001408	1
GO:0030131	clathrin adaptor complex	CC	1	1	270	1627	TR3971_c0_g1	0.165949600491702	0.444274521001408	1
GO:0030133	transport vesicle	CC	1	1	270	1627	TR14438_c0_g1	0.165949600491702	0.444274521001408	1
GO:0030134	COPII-coated ER to Golgi transport vesicle	CC	1	1	270	1627	TR14438_c0_g1	0.165949600491702	0.444274521001408	1
GO:0030137	COPI-coated vesicle	CC	1	1	270	1627	TR18062_c0_g1	0.165949600491702	0.444274521001408	1
GO:0030427	site of polarized growth	CC	1	1	270	1627	TR4270_c0_g1	0.165949600491702	0.444274521001408	1
GO:0030658	transport vesicle membrane	CC	1	1	270	1627	TR14438_c0_g1	0.165949600491702	0.444274521001408	1
GO:0030663	COPI-coated vesicle membrane	CC	1	1	270	1627	TR18062_c0_g1	0.165949600491702	0.444274521001408	1
GO:0031011	Ino80 complex	CC	1	1	270	1627	TR1202_c0_g1	0.165949600491702	0.444274521001408	1
GO:0031105	septin complex	CC	1	1	270	1627	TR4270_c0_g1	0.165949600491702	0.444274521001408	1
GO:0031234	extrinsic component of cytoplasmic side of plasma membrane	CC	1	1	270	1627	TR591_c0_g1	0.165949600491702	0.444274521001408	1
GO:0032156	septin cytoskeleton	CC	1	1	270	1627	TR4270_c0_g1	0.165949600491702	0.444274521001408	1
GO:0032160	septin filament array	CC	1	1	270	1627	TR4270_c0_g1	0.165949600491702	0.444274521001408	1
GO:0032161	cleavage apparatus septin structure	CC	1	1	270	1627	TR4270_c0_g1	0.165949600491702	0.444274521001408	1
GO:0033178	proton-transporting two-sector ATPase complex, catalytic domain	CC	1	1	270	1627	TR1758_c0_g1	0.165949600491702	0.444274521001408	1
GO:0033180	proton-transporting V-type ATPase, V1 domain	CC	1	1	270	1627	TR1758_c0_g1	0.165949600491702	0.444274521001408	1
GO:0033202	DNA helicase complex	CC	1	1	270	1627	TR1202_c0_g1	0.165949600491702	0.444274521001408	1
GO:0070603	SWI/SNF superfamily-type complex	CC	1	1	270	1627	TR1202_c0_g1	0.165949600491702	0.444274521001408	1
GO:0097346	INO80-type complex	CC	1	1	270	1627	TR1202_c0_g1	0.165949600491702	0.444274521001408	1
GO:0098852	lytic vacuole membrane	CC	1	1	270	1627	TR1758_c0_g1	0.165949600491702	0.444274521001408	1
GO:1905360	GTPase complex	CC	1	1	270	1627	TR591_c0_g1	0.165949600491702	0.444274521001408	1
GO:0043632	modification-dependent macromolecule catabolic process	BP	3	9	270	1627	TR1589_c0_g1,TR12937_c0_g1,TR4378_c0_g1	0.176096411709363	0.467072014329043	0.333333333333333
GO:0048038	quinone binding	MF	3	9	270	1627	TR16469_c0_g1,TR2262_c0_g1,TR971_c0_g1	0.176096411709363	0.467072014329043	0.333333333333333
GO:0031966	mitochondrial membrane	CC	3	9	270	1627	TR10464_c0_g1,TR547_c0_g3,TR6239_c0_g1	0.176096411709363	0.467072014329043	0.333333333333333
GO:0071840	cellular component organization or biogenesis	BP	14	65	270	1627	TR4270_c0_g1,TR10975_c0_g1,TR11224_c0_g1,TR4856_c1_g1,TR2890_c0_g1,TR1202_c0_g1,TR849_c0_g1,TR1163_c0_g2,TR5275_c0_g1,TR14438_c0_g1,TR420_c0_g1,TR4378_c0_g1,TR3246_c0_g1,TR635_c0_g1	0.176296789722237	0.467072014329043	0.215384615384615
GO:0055114	oxidation-reduction process	BP	34	176	270	1627	TR3335_c0_g1,TR38_c0_g2,TR547_c0_g3,TR7064_c0_g1,TR6239_c0_g1,TR1227_c1_g1,TR12812_c0_g1,TR13_c0_g1,TR15031_c0_g1,TR16469_c0_g1,TR16620_c0_g1,TR18385_c0_g1,TR2262_c0_g1,TR2607_c0_g1,TR4711_c0_g2,TR550_c0_g1,TR7112_c0_g1,TR745_c0_g1,TR971_c0_g1,TR155_c0_g1,TR16413_c0_g1,TR16623_c0_g1,TR242_c0_g1,TR2718_c0_g1,TR3499_c0_g1,TR3875_c0_g1,TR4196_c0_g1,TR4242_c0_g1,TR4424_c0_g1,TR4486_c0_g1,TR4493_c0_g1…	0.177695675258262	0.469558520112507	0.193181818181818
GO:0009123	nucleoside monophosphate metabolic process	BP	4	14	270	1627	TR547_c0_g3,TR10464_c0_g1,TR6239_c0_g1,TR1758_c0_g1	0.190798673847871	0.484703774811482	0.285714285714286
GO:0009126	purine nucleoside monophosphate metabolic process	BP	4	14	270	1627	TR547_c0_g3,TR10464_c0_g1,TR6239_c0_g1,TR1758_c0_g1	0.190798673847871	0.484703774811482	0.285714285714286
GO:0009161	ribonucleoside monophosphate metabolic process	BP	4	14	270	1627	TR547_c0_g3,TR10464_c0_g1,TR6239_c0_g1,TR1758_c0_g1	0.190798673847871	0.484703774811482	0.285714285714286
GO:0009167	purine ribonucleoside monophosphate metabolic process	BP	4	14	270	1627	TR547_c0_g3,TR10464_c0_g1,TR6239_c0_g1,TR1758_c0_g1	0.190798673847871	0.484703774811482	0.285714285714286
GO:0048522	positive regulation of cellular process	BP	4	14	270	1627	TR3246_c0_g1,TR4270_c0_g1,TR10975_c0_g1,TR591_c0_g1	0.190798673847871	0.484703774811482	0.285714285714286
GO:0030154	cell differentiation	BP	2	5	270	1627	TR420_c0_g1,TR591_c0_g1	0.194663212047937	0.484703774811482	0.4
GO:0051301	cell division	BP	2	5	270	1627	TR4270_c0_g1,TR635_c0_g1	0.194663212047937	0.484703774811482	0.4
GO:0051321	meiotic cell cycle	BP	2	5	270	1627	TR1163_c0_g2,TR420_c0_g1	0.194663212047937	0.484703774811482	0.4
GO:0097237	cellular response to toxic substance	BP	2	5	270	1627	TR16620_c0_g1,TR16623_c0_g1	0.194663212047937	0.484703774811482	0.4
GO:1990748	cellular detoxification	BP	2	5	270	1627	TR16620_c0_g1,TR16623_c0_g1	0.194663212047937	0.484703774811482	0.4
GO:0008171	O-methyltransferase activity	MF	2	5	270	1627	TR14912_c0_g1,TR3940_c0_g1	0.194663212047937	0.484703774811482	0.4
GO:0008234	cysteine-type peptidase activity	MF	2	5	270	1627	TR1091_c0_g1,TR12937_c0_g1	0.194663212047937	0.484703774811482	0.4
GO:0008236	serine-type peptidase activity	MF	2	5	270	1627	TR2813_c0_g1,TR4857_c0_g1	0.194663212047937	0.484703774811482	0.4
GO:0008757	S-adenosylmethionine-dependent methyltransferase activity	MF	2	5	270	1627	TR4856_c1_g1,TR1343_c0_g1	0.194663212047937	0.484703774811482	0.4
GO:0017171	serine hydrolase activity	MF	2	5	270	1627	TR2813_c0_g1,TR4857_c0_g1	0.194663212047937	0.484703774811482	0.4
GO:0000228	nuclear chromosome	CC	2	5	270	1627	TR10975_c0_g1,TR1202_c0_g1	0.194663212047937	0.484703774811482	0.4
GO:0000502	proteasome complex	CC	2	5	270	1627	TR1589_c0_g1,TR4378_c0_g1	0.194663212047937	0.484703774811482	0.4
GO:0031410	cytoplasmic vesicle	CC	2	5	270	1627	TR14438_c0_g1,TR18062_c0_g1	0.194663212047937	0.484703774811482	0.4
GO:0032153	cell division site	CC	2	5	270	1627	TR635_c0_g1,TR4270_c0_g1	0.194663212047937	0.484703774811482	0.4
GO:0044454	nuclear chromosome part	CC	2	5	270	1627	TR10975_c0_g1,TR1202_c0_g1	0.194663212047937	0.484703774811482	0.4
GO:0097708	intracellular vesicle	CC	2	5	270	1627	TR14438_c0_g1,TR18062_c0_g1	0.194663212047937	0.484703774811482	0.4
GO:1905368	peptidase complex	CC	2	5	270	1627	TR4378_c0_g1,TR1589_c0_g1	0.194663212047937	0.484703774811482	0.4
GO:1905369	endopeptidase complex	CC	2	5	270	1627	TR4378_c0_g1,TR1589_c0_g1	0.194663212047937	0.484703774811482	0.4
GO:0022607	cellular component assembly	BP	5	19	270	1627	TR4270_c0_g1,TR14438_c0_g1,TR420_c0_g1,TR4378_c0_g1,TR635_c0_g1	0.195307109262274	0.484703774811482	0.263157894736842
GO:0072521	purine-containing compound metabolic process	BP	5	19	270	1627	TR547_c0_g3,TR3800_c0_g1,TR10464_c0_g1,TR6239_c0_g1,TR1758_c0_g1	0.195307109262274	0.484703774811482	0.263157894736842
GO:0003824	catalytic activity	MF	141	810	270	1627	TR1758_c0_g1,TR420_c0_g1,TR420_c0_g2,TR4270_c0_g1,TR591_c0_g1,TR4196_c0_g1,TR14446_c0_g1,TR2813_c0_g1,TR10328_c0_g1,TR13_c0_g1,TR6217_c0_g1,TR4305_c0_g1,TR547_c0_g3,TR7064_c0_g1,TR1589_c0_g1,TR4857_c0_g1,TR1091_c0_g1,TR12937_c0_g1,TR4378_c0_g1,TR2858_c0_g1,TR3335_c0_g1,TR14507_c0_g1,TR3636_c0_g1,TR38_c0_g2,TR2607_c0_g1,TR1903_c0_g4,TR1390_c0_g1,TR16714_c0_g1,TR5848_c0_g1,TR3800_c0_g1,TR3246_c0_g1…	0.208856302456146	0.517071428410846	0.174074074074074
GO:0070887	cellular response to chemical stimulus	BP	5	20	270	1627	TR3246_c0_g1,TR591_c0_g1,TR4839_c0_g1,TR16620_c0_g1,TR16623_c0_g1	0.227456302382738	0.550686827753851	0.25
GO:0008324	cation transmembrane transporter activity	MF	5	20	270	1627	TR1758_c0_g1,TR547_c0_g3,TR7064_c0_g1,TR10464_c0_g1,TR4697_c0_g1	0.227456302382738	0.550686827753851	0.25
GO:0016741	transferase activity, transferring one-carbon groups	MF	5	20	270	1627	TR5212_c0_g1,TR14912_c0_g1,TR3940_c0_g1,TR1343_c0_g1,TR4856_c1_g1	0.227456302382738	0.550686827753851	0.25
GO:0031967	organelle envelope	CC	5	20	270	1627	TR4839_c0_g1,TR3622_c0_g1,TR10464_c0_g1,TR547_c0_g3,TR6239_c0_g1	0.227456302382738	0.550686827753851	0.25
GO:0009150	purine ribonucleotide metabolic process	BP	4	15	270	1627	TR547_c0_g3,TR10464_c0_g1,TR6239_c0_g1,TR1758_c0_g1	0.228373066803803	0.550686827753851	0.266666666666667
GO:0009259	ribonucleotide metabolic process	BP	4	15	270	1627	TR547_c0_g3,TR10464_c0_g1,TR6239_c0_g1,TR1758_c0_g1	0.228373066803803	0.550686827753851	0.266666666666667
GO:0019693	ribose phosphate metabolic process	BP	4	15	270	1627	TR547_c0_g3,TR10464_c0_g1,TR6239_c0_g1,TR1758_c0_g1	0.228373066803803	0.550686827753851	0.266666666666667
GO:0034622	cellular protein-containing complex assembly	BP	4	15	270	1627	TR4270_c0_g1,TR14438_c0_g1,TR420_c0_g1,TR4378_c0_g1	0.228373066803803	0.550686827753851	0.266666666666667
GO:0048518	positive regulation of biological process	BP	4	15	270	1627	TR3246_c0_g1,TR4270_c0_g1,TR10975_c0_g1,TR591_c0_g1	0.228373066803803	0.550686827753851	0.266666666666667
GO:0016616	oxidoreductase activity, acting on the CH-OH group of donors, NAD or NADP as acceptor	MF	4	15	270	1627	TR3335_c0_g1,TR5183_c0_g1,TR1832_c0_g1,TR3095_c0_g1	0.228373066803803	0.550686827753851	0.266666666666667
GO:0044427	chromosomal part	CC	4	15	270	1627	TR1738_c0_g1,TR1817_c0_g1,TR10975_c0_g1,TR1202_c0_g1	0.228373066803803	0.550686827753851	0.266666666666667
GO:0032991	protein-containing complex	CC	18	91	270	1627	TR10975_c0_g1,TR1589_c0_g1,TR2699_c0_g1,TR4378_c0_g1,TR4270_c0_g1,TR1973_c0_g1,TR2704_c0_g1,TR365_c0_g2,TR1738_c0_g1,TR4761_c0_g1,TR4317_c0_g1,TR709_c0_g1,TR3971_c0_g1,TR18062_c0_g1,TR1758_c0_g1,TR1202_c0_g1,TR591_c0_g1,TR1817_c0_g1	0.238740347015847	0.574328193292838	0.197802197802198
GO:0140096	catalytic activity, acting on a protein	MF	10	47	270	1627	TR14446_c0_g1,TR2813_c0_g1,TR1589_c0_g1,TR4857_c0_g1,TR1091_c0_g1,TR12937_c0_g1,TR4378_c0_g1,TR2858_c0_g1,TR3246_c0_g1,TR4856_c1_g1	0.242220908102364	0.580437299757542	0.212765957446809
GO:0006508	proteolysis	BP	6	26	270	1627	TR1589_c0_g1,TR12937_c0_g1,TR4378_c0_g1,TR2813_c0_g1,TR1091_c0_g1,TR4857_c0_g1	0.253209295631657	0.580437299757542	0.230769230769231
GO:0015833	peptide transport	BP	5	21	270	1627	TR8106_c0_g1,TR14438_c0_g1,TR3971_c0_g1,TR18062_c0_g1,TR1136_c0_g1	0.261015898810603	0.580437299757542	0.238095238095238
GO:0009636	response to toxic substance	BP	2	6	270	1627	TR16620_c0_g1,TR16623_c0_g1	0.261369487293279	0.580437299757542	0.333333333333333
GO:0009891	positive regulation of biosynthetic process	BP	2	6	270	1627	TR10975_c0_g1,TR591_c0_g1	0.261369487293279	0.580437299757542	0.333333333333333
GO:0031328	positive regulation of cellular biosynthetic process	BP	2	6	270	1627	TR10975_c0_g1,TR591_c0_g1	0.261369487293279	0.580437299757542	0.333333333333333
GO:0033043	regulation of organelle organization	BP	2	6	270	1627	TR5275_c0_g1,TR3246_c0_g1	0.261369487293279	0.580437299757542	0.333333333333333
GO:0042592	homeostatic process	BP	2	6	270	1627	TR10975_c0_g1,TR1758_c0_g1	0.261369487293279	0.580437299757542	0.333333333333333
GO:0051704	multi-organism process	BP	2	6	270	1627	TR591_c0_g1,TR420_c0_g1	0.261369487293279	0.580437299757542	0.333333333333333
GO:0098754	detoxification	BP	2	6	270	1627	TR16620_c0_g1,TR16623_c0_g1	0.261369487293279	0.580437299757542	0.333333333333333
GO:0031982	vesicle	CC	2	6	270	1627	TR14438_c0_g1,TR18062_c0_g1	0.261369487293279	0.580437299757542	0.333333333333333
GO:0005622	intracellular	CC	60	336	270	1627	TR3593_c0_g1,TR3649_c0_g1,TR452_c1_g1,TR4090_c0_g3,TR421_c0_g1,TR14438_c0_g1,TR4270_c0_g1,TR591_c0_g1,TR1758_c0_g1,TR10975_c0_g1,TR1738_c0_g1,TR7064_c0_g1,TR7166_c0_g1,TR83_c0_g1,TR1008_c1_g1,TR1589_c0_g1,TR18062_c0_g1,TR1817_c0_g1,TR2861_c0_g1,TR3800_c0_g1,TR4317_c0_g1,TR4839_c0_g1,TR1973_c0_g1,TR2704_c0_g1,TR365_c0_g2,TR10320_c0_g1,TR1163_c0_g2,TR2890_c0_g1,TR3991_c0_g1,TR4378_c0_g1,TR5095_c0_g…	0.266837516152504	0.580437299757542	0.178571428571429
GO:0034613	cellular protein localization	BP	4	16	270	1627	TR8106_c0_g1,TR14438_c0_g1,TR3971_c0_g1,TR4761_c0_g1	0.267590756722138	0.580437299757542	0.25
GO:0065003	protein-containing complex assembly	BP	4	16	270	1627	TR4270_c0_g1,TR14438_c0_g1,TR420_c0_g1,TR4378_c0_g1	0.267590756722138	0.580437299757542	0.25
GO:0070727	cellular macromolecule localization	BP	4	16	270	1627	TR8106_c0_g1,TR14438_c0_g1,TR3971_c0_g1,TR4761_c0_g1	0.267590756722138	0.580437299757542	0.25
GO:0016810	hydrolase activity, acting on carbon-nitrogen (but not peptide) bonds	MF	4	16	270	1627	TR6217_c0_g1,TR4865_c0_g1,TR3241_c0_g1,TR3332_c0_g1	0.267590756722138	0.580437299757542	0.25
GO:0006260	DNA replication	BP	3	11	270	1627	TR1817_c0_g1,TR14507_c0_g1,TR3636_c0_g1	0.270597358507505	0.580437299757542	0.272727272727273
GO:0098588	bounding membrane of organelle	CC	3	11	270	1627	TR14438_c0_g1,TR1758_c0_g1,TR18062_c0_g1	0.270597358507505	0.580437299757542	0.272727272727273
GO:0017144	drug metabolic process	BP	8	38	270	1627	TR3335_c0_g1,TR38_c0_g2,TR283_c0_g1,TR547_c0_g3,TR10464_c0_g1,TR6239_c0_g1,TR1758_c0_g1,TR591_c0_g1	0.287658184790413	0.580437299757542	0.210526315789474
GO:0044424	intracellular part	CC	57	321	270	1627	TR591_c0_g1,TR10975_c0_g1,TR1386_c0_g1,TR3076_c0_g1,TR3991_c0_g1,TR420_c0_g1,TR420_c0_g2,TR8106_c0_g1,TR5183_c0_g1,TR1589_c0_g1,TR4378_c0_g1,TR11224_c0_g1,TR4635_c0_g1,TR4856_c1_g1,TR13706_c0_g1,TR3246_c0_g1,TR10320_c0_g1,TR5275_c0_g1,TR10464_c0_g1,TR547_c0_g3,TR6239_c0_g1,TR1202_c0_g1,TR3093_c0_g1,TR7064_c0_g1,TR7166_c0_g1,TR83_c0_g1,TR1008_c1_g1,TR1758_c0_g1,TR18062_c0_g1,TR1817_c0_g1,TR2861_c0…	0.291582893772853	0.580437299757542	0.177570093457944
GO:0008104	protein localization	BP	5	22	270	1627	TR8106_c0_g1,TR14438_c0_g1,TR3971_c0_g1,TR18062_c0_g1,TR4761_c0_g1	0.295631377347162	0.580437299757542	0.227272727272727
GO:0042886	amide transport	BP	5	22	270	1627	TR8106_c0_g1,TR14438_c0_g1,TR3971_c0_g1,TR18062_c0_g1,TR1136_c0_g1	0.295631377347162	0.580437299757542	0.227272727272727
GO:0000165	MAPK cascade	BP	1	2	270	1627	TR3246_c0_g1	0.304445054284593	0.580437299757542	0.5
GO:0000413	protein peptidyl-prolyl isomerization	BP	1	2	270	1627	TR14446_c0_g1	0.304445054284593	0.580437299757542	0.5
GO:0000819	sister chromatid segregation	BP	1	2	270	1627	TR5275_c0_g1	0.304445054284593	0.580437299757542	0.5
GO:0001932	regulation of protein phosphorylation	BP	1	2	270	1627	TR4270_c0_g1	0.304445054284593	0.580437299757542	0.5
GO:0006099	tricarboxylic acid cycle	BP	1	2	270	1627	TR38_c0_g2	0.304445054284593	0.580437299757542	0.5
GO:0006271	DNA strand elongation involved in DNA replication	BP	1	2	270	1627	TR1817_c0_g1	0.304445054284593	0.580437299757542	0.5
GO:0006383	transcription by RNA polymerase III	BP	1	2	270	1627	TR1243_c0_g1	0.304445054284593	0.580437299757542	0.5
GO:0006563	L-serine metabolic process	BP	1	2	270	1627	TR3800_c0_g1	0.304445054284593	0.580437299757542	0.5
GO:0006873	cellular ion homeostasis	BP	1	2	270	1627	TR1758_c0_g1	0.304445054284593	0.580437299757542	0.5
GO:0006885	regulation of pH	BP	1	2	270	1627	TR1758_c0_g1	0.304445054284593	0.580437299757542	0.5
GO:0006888	ER to Golgi vesicle-mediated transport	BP	1	2	270	1627	TR14438_c0_g1	0.304445054284593	0.580437299757542	0.5
GO:0006970	response to osmotic stress	BP	1	2	270	1627	TR3246_c0_g1	0.304445054284593	0.580437299757542	0.5
GO:0009070	serine family amino acid biosynthetic process	BP	1	2	270	1627	TR3800_c0_g1	0.304445054284593	0.580437299757542	0.5
GO:0009314	response to radiation	BP	1	2	270	1627	TR1817_c0_g1	0.304445054284593	0.580437299757542	0.5
GO:0009411	response to UV	BP	1	2	270	1627	TR1817_c0_g1	0.304445054284593	0.580437299757542	0.5
GO:0009416	response to light stimulus	BP	1	2	270	1627	TR1817_c0_g1	0.304445054284593	0.580437299757542	0.5
GO:0015939	pantothenate metabolic process	BP	1	2	270	1627	TR5183_c0_g1	0.304445054284593	0.580437299757542	0.5
GO:0015940	pantothenate biosynthetic process	BP	1	2	270	1627	TR5183_c0_g1	0.304445054284593	0.580437299757542	0.5
GO:0015985	energy coupled proton transport, down electrochemical gradient	BP	1	2	270	1627	TR10464_c0_g1	0.304445054284593	0.580437299757542	0.5
GO:0015986	ATP synthesis coupled proton transport	BP	1	2	270	1627	TR10464_c0_g1	0.304445054284593	0.580437299757542	0.5
GO:0016050	vesicle organization	BP	1	2	270	1627	TR14438_c0_g1	0.304445054284593	0.580437299757542	0.5
GO:0018208	peptidyl-proline modification	BP	1	2	270	1627	TR14446_c0_g1	0.304445054284593	0.580437299757542	0.5
GO:0019646	aerobic electron transport chain	BP	1	2	270	1627	TR7064_c0_g1	0.304445054284593	0.580437299757542	0.5
GO:0019748	secondary metabolic process	BP	1	2	270	1627	TR591_c0_g1	0.304445054284593	0.580437299757542	0.5
GO:0019932	second-messenger-mediated signaling	BP	1	2	270	1627	TR591_c0_g1	0.304445054284593	0.580437299757542	0.5
GO:0019954	asexual reproduction	BP	1	2	270	1627	TR591_c0_g1	0.304445054284593	0.580437299757542	0.5
GO:0022616	DNA strand elongation	BP	1	2	270	1627	TR1817_c0_g1	0.304445054284593	0.580437299757542	0.5
GO:0030003	cellular cation homeostasis	BP	1	2	270	1627	TR1758_c0_g1	0.304445054284593	0.580437299757542	0.5
GO:0030004	cellular monovalent inorganic cation homeostasis	BP	1	2	270	1627	TR1758_c0_g1	0.304445054284593	0.580437299757542	0.5
GO:0030641	regulation of cellular pH	BP	1	2	270	1627	TR1758_c0_g1	0.304445054284593	0.580437299757542	0.5
GO:0030653	beta-lactam antibiotic metabolic process	BP	1	2	270	1627	TR591_c0_g1	0.304445054284593	0.580437299757542	0.5
GO:0032270	positive regulation of cellular protein metabolic process	BP	1	2	270	1627	TR4270_c0_g1	0.304445054284593	0.580437299757542	0.5
GO:0032505	reproduction of a single-celled organism	BP	1	2	270	1627	TR420_c0_g1	0.304445054284593	0.580437299757542	0.5
GO:0032506	cytokinetic process	BP	1	2	270	1627	TR635_c0_g1	0.304445054284593	0.580437299757542	0.5
GO:0034644	cellular response to UV	BP	1	2	270	1627	TR1817_c0_g1	0.304445054284593	0.580437299757542	0.5
GO:0035690	cellular response to drug	BP	1	2	270	1627	TR591_c0_g1	0.304445054284593	0.580437299757542	0.5
GO:0043248	proteasome assembly	BP	1	2	270	1627	TR4378_c0_g1	0.304445054284593	0.580437299757542	0.5
GO:0043549	regulation of kinase activity	BP	1	2	270	1627	TR4270_c0_g1	0.304445054284593	0.580437299757542	0.5
GO:0044550	secondary metabolite biosynthetic process	BP	1	2	270	1627	TR591_c0_g1	0.304445054284593	0.580437299757542	0.5
GO:0045859	regulation of protein kinase activity	BP	1	2	270	1627	TR4270_c0_g1	0.304445054284593	0.580437299757542	0.5
GO:0048646	anatomical structure formation involved in morphogenesis	BP	1	2	270	1627	TR420_c0_g1	0.304445054284593	0.580437299757542	0.5
GO:0051247	positive regulation of protein metabolic process	BP	1	2	270	1627	TR4270_c0_g1	0.304445054284593	0.580437299757542	0.5
GO:0051258	protein polymerization	BP	1	2	270	1627	TR420_c0_g1	0.304445054284593	0.580437299757542	0.5
GO:0051338	regulation of transferase activity	BP	1	2	270	1627	TR4270_c0_g1	0.304445054284593	0.580437299757542	0.5
GO:0051453	regulation of intracellular pH	BP	1	2	270	1627	TR1758_c0_g1	0.304445054284593	0.580437299757542	0.5
GO:0055067	monovalent inorganic cation homeostasis	BP	1	2	270	1627	TR1758_c0_g1	0.304445054284593	0.580437299757542	0.5
GO:0055080	cation homeostasis	BP	1	2	270	1627	TR1758_c0_g1	0.304445054284593	0.580437299757542	0.5
GO:0055082	cellular chemical homeostasis	BP	1	2	270	1627	TR1758_c0_g1	0.304445054284593	0.580437299757542	0.5
GO:0061024	membrane organization	BP	1	2	270	1627	TR14438_c0_g1	0.304445054284593	0.580437299757542	0.5
GO:0061919	process utilizing autophagic mechanism	BP	1	2	270	1627	TR4761_c0_g1	0.304445054284593	0.580437299757542	0.5
GO:0062012	regulation of small molecule metabolic process	BP	1	2	270	1627	TR591_c0_g1	0.304445054284593	0.580437299757542	0.5
GO:0070525	tRNA threonylcarbamoyladenosine metabolic process	BP	1	2	270	1627	TR10975_c0_g1	0.304445054284593	0.580437299757542	0.5
GO:0070646	protein modification by small protein removal	BP	1	2	270	1627	TR12937_c0_g1	0.304445054284593	0.580437299757542	0.5
GO:0070914	UV-damage excision repair	BP	1	2	270	1627	TR1817_c0_g1	0.304445054284593	0.580437299757542	0.5
GO:0070925	organelle assembly	BP	1	2	270	1627	TR4270_c0_g1	0.304445054284593	0.580437299757542	0.5
GO:0071470	cellular response to osmotic stress	BP	1	2	270	1627	TR3246_c0_g1	0.304445054284593	0.580437299757542	0.5
GO:0071478	cellular response to radiation	BP	1	2	270	1627	TR1817_c0_g1	0.304445054284593	0.580437299757542	0.5
GO:0071482	cellular response to light stimulus	BP	1	2	270	1627	TR1817_c0_g1	0.304445054284593	0.580437299757542	0.5
GO:0072338	cellular lactam metabolic process	BP	1	2	270	1627	TR591_c0_g1	0.304445054284593	0.580437299757542	0.5
GO:0072665	protein localization to vacuole	BP	1	2	270	1627	TR4761_c0_g1	0.304445054284593	0.580437299757542	0.5
GO:0098771	inorganic ion homeostasis	BP	1	2	270	1627	TR1758_c0_g1	0.304445054284593	0.580437299757542	0.5
GO:0098813	nuclear chromosome segregation	BP	1	2	270	1627	TR5275_c0_g1	0.304445054284593	0.580437299757542	0.5
GO:0003682	chromatin binding	MF	1	2	270	1627	TR10975_c0_g1	0.304445054284593	0.580437299757542	0.5
GO:0003690	double-stranded DNA binding	MF	1	2	270	1627	TR2861_c0_g1	0.304445054284593	0.580437299757542	0.5
GO:0003755	peptidyl-prolyl cis-trans isomerase activity	MF	1	2	270	1627	TR14446_c0_g1	0.304445054284593	0.580437299757542	0.5
GO:0005102	signaling receptor binding	MF	1	2	270	1627	TR591_c0_g1	0.304445054284593	0.580437299757542	0.5
GO:0005543	phospholipid binding	MF	1	2	270	1627	TR4270_c0_g1	0.304445054284593	0.580437299757542	0.5
GO:0008170	N-methyltransferase activity	MF	1	2	270	1627	TR4856_c1_g1	0.304445054284593	0.580437299757542	0.5
GO:0008276	protein methyltransferase activity	MF	1	2	270	1627	TR4856_c1_g1	0.304445054284593	0.580437299757542	0.5
GO:0008289	lipid binding	MF	1	2	270	1627	TR4270_c0_g1	0.304445054284593	0.580437299757542	0.5
GO:0016722	oxidoreductase activity, oxidizing metal ions	MF	1	2	270	1627	TR4196_c0_g1	0.304445054284593	0.580437299757542	0.5
GO:0016846	carbon-sulfur lyase activity	MF	1	2	270	1627	TR370_c0_g1	0.304445054284593	0.580437299757542	0.5
GO:0016859	cis-trans isomerase activity	MF	1	2	270	1627	TR14446_c0_g1	0.304445054284593	0.580437299757542	0.5
GO:0035091	phosphatidylinositol binding	MF	1	2	270	1627	TR4270_c0_g1	0.304445054284593	0.580437299757542	0.5
GO:0036442	proton-exporting ATPase activity	MF	1	2	270	1627	TR1758_c0_g1	0.304445054284593	0.580437299757542	0.5
GO:0044769	ATPase activity, coupled to transmembrane movement of ions, rotational mechanism	MF	1	2	270	1627	TR1758_c0_g1	0.304445054284593	0.580437299757542	0.5
GO:0046961	proton-transporting ATPase activity, rotational mechanism	MF	1	2	270	1627	TR1758_c0_g1	0.304445054284593	0.580437299757542	0.5
GO:1901981	phosphatidylinositol phosphate binding	MF	1	2	270	1627	TR4270_c0_g1	0.304445054284593	0.580437299757542	0.5
GO:1990837	sequence-specific double-stranded DNA binding	MF	1	2	270	1627	TR2861_c0_g1	0.304445054284593	0.580437299757542	0.5
GO:0009898	cytoplasmic side of plasma membrane	CC	1	2	270	1627	TR591_c0_g1	0.304445054284593	0.580437299757542	0.5
GO:0015629	actin cytoskeleton	CC	1	2	270	1627	TR635_c0_g1	0.304445054284593	0.580437299757542	0.5
GO:0031391	Elg1 RFC-like complex	CC	1	2	270	1627	TR1817_c0_g1	0.304445054284593	0.580437299757542	0.5
GO:0034515	proteasome storage granule	CC	1	2	270	1627	TR4378_c0_g1	0.304445054284593	0.580437299757542	0.5
GO:0042995	cell projection	CC	1	2	270	1627	TR4270_c0_g1	0.304445054284593	0.580437299757542	0.5
GO:0044437	vacuolar part	CC	1	2	270	1627	TR1758_c0_g1	0.304445054284593	0.580437299757542	0.5
GO:0098552	side of membrane	CC	1	2	270	1627	TR591_c0_g1	0.304445054284593	0.580437299757542	0.5
GO:0098562	cytoplasmic side of membrane	CC	1	2	270	1627	TR591_c0_g1	0.304445054284593	0.580437299757542	0.5
GO:0099023	tethering complex	CC	1	2	270	1627	TR4761_c0_g1	0.304445054284593	0.580437299757542	0.5
GO:0120025	plasma membrane bounded cell projection	CC	1	2	270	1627	TR4270_c0_g1	0.304445054284593	0.580437299757542	0.5
GO:0006163	purine nucleotide metabolic process	BP	4	17	270	1627	TR547_c0_g3,TR10464_c0_g1,TR6239_c0_g1,TR1758_c0_g1	0.307888932104966	0.585908042438554	0.235294117647059
GO:0006310	DNA recombination	BP	2	7	270	1627	TR10975_c0_g1,TR1163_c0_g2	0.328182755947403	0.610851115084582	0.285714285714286
GO:0009628	response to abiotic stimulus	BP	2	7	270	1627	TR1817_c0_g1,TR3246_c0_g1	0.328182755947403	0.610851115084582	0.285714285714286
GO:0032268	regulation of cellular protein metabolic process	BP	2	7	270	1627	TR4270_c0_g1,TR3246_c0_g1	0.328182755947403	0.610851115084582	0.285714285714286
GO:0032502	developmental process	BP	2	7	270	1627	TR591_c0_g1,TR420_c0_g1	0.328182755947403	0.610851115084582	0.285714285714286
GO:0042180	cellular ketone metabolic process	BP	2	7	270	1627	TR6217_c0_g1,TR591_c0_g1	0.328182755947403	0.610851115084582	0.285714285714286
GO:0044106	cellular amine metabolic process	BP	2	7	270	1627	TR6217_c0_g1,TR591_c0_g1	0.328182755947403	0.610851115084582	0.285714285714286
GO:0048856	anatomical structure development	BP	2	7	270	1627	TR591_c0_g1,TR420_c0_g1	0.328182755947403	0.610851115084582	0.285714285714286
GO:0048869	cellular developmental process	BP	2	7	270	1627	TR420_c0_g1,TR591_c0_g1	0.328182755947403	0.610851115084582	0.285714285714286
GO:0051246	regulation of protein metabolic process	BP	2	7	270	1627	TR3246_c0_g1,TR4270_c0_g1	0.328182755947403	0.610851115084582	0.285714285714286
GO:0008565	protein transporter activity	MF	2	7	270	1627	TR14438_c0_g1,TR3991_c0_g1	0.328182755947403	0.610851115084582	0.285714285714286
GO:0051213	dioxygenase activity	MF	2	7	270	1627	TR2607_c0_g1,TR18385_c0_g1	0.328182755947403	0.610851115084582	0.285714285714286
GO:1904949	ATPase complex	CC	2	7	270	1627	TR1817_c0_g1,TR1202_c0_g1	0.328182755947403	0.610851115084582	0.285714285714286
GO:0033036	macromolecule localization	BP	5	23	270	1627	TR8106_c0_g1,TR14438_c0_g1,TR3971_c0_g1,TR18062_c0_g1,TR4761_c0_g1	0.330953783275086	0.613768834437433	0.217391304347826
GO:0031975	envelope	CC	5	23	270	1627	TR4839_c0_g1,TR3622_c0_g1,TR10464_c0_g1,TR547_c0_g3,TR6239_c0_g1	0.330953783275086	0.613768834437433	0.217391304347826
GO:1901564	organonitrogen compound metabolic process	BP	33	185	270	1627	TR3246_c0_g1,TR14446_c0_g1,TR547_c0_g3,TR1973_c0_g1,TR4317_c0_g1,TR709_c0_g1,TR365_c0_g2,TR14307_c0_g1,TR1386_c0_g1,TR2813_c0_g1,TR1091_c0_g1,TR4857_c0_g1,TR1589_c0_g1,TR12937_c0_g1,TR4305_c0_g1,TR3800_c0_g1,TR1832_c0_g1,TR10328_c0_g1,TR16469_c0_g1,TR2262_c0_g1,TR971_c0_g1,TR4768_c0_g1,TR4378_c0_g1,TR5183_c0_g1,TR10464_c0_g1,TR6217_c0_g1,TR4839_c0_g1,TR6239_c0_g1,TR1758_c0_g1,TR5275_c0_g1,TR4270_…	0.347151048558561	0.642080362997562	0.178378378378378
GO:0043933	protein-containing complex subunit organization	BP	4	18	270	1627	TR4270_c0_g1,TR14438_c0_g1,TR420_c0_g1,TR4378_c0_g1	0.34873776578495	0.642080362997562	0.222222222222222
GO:0051641	cellular localization	BP	4	18	270	1627	TR8106_c0_g1,TR14438_c0_g1,TR3971_c0_g1,TR4761_c0_g1	0.34873776578495	0.642080362997562	0.222222222222222
GO:0005694	chromosome	CC	4	18	270	1627	TR1738_c0_g1,TR10975_c0_g1,TR1202_c0_g1,TR1817_c0_g1	0.34873776578495	0.642080362997562	0.222222222222222
GO:0016829	lyase activity	MF	5	24	270	1627	TR4768_c0_g1,TR370_c0_g1,TR3332_c0_g1,TR1419_c0_g1,TR3452_c0_g1	0.366648235806989	0.672628058494836	0.208333333333333
GO:0012505	endomembrane system	CC	5	24	270	1627	TR4839_c0_g1,TR849_c0_g1,TR14438_c0_g1,TR18062_c0_g1,TR4761_c0_g1	0.366648235806989	0.672628058494836	0.208333333333333
GO:0006886	intracellular protein transport	BP	3	13	270	1627	TR8106_c0_g1,TR14438_c0_g1,TR3971_c0_g1	0.369151390331846	0.673585721177967	0.230769230769231
GO:0035556	intracellular signal transduction	BP	3	13	270	1627	TR3246_c0_g1,TR591_c0_g1,TR11397_c0_g1	0.369151390331846	0.673585721177967	0.230769230769231
GO:0072330	monocarboxylic acid biosynthetic process	BP	3	13	270	1627	TR1227_c1_g1,TR5183_c0_g1,TR591_c0_g1	0.369151390331846	0.673585721177967	0.230769230769231
GO:0006082	organic acid metabolic process	BP	14	76	270	1627	TR38_c0_g2,TR283_c0_g1,TR14307_c0_g1,TR1386_c0_g1,TR4305_c0_g1,TR3800_c0_g1,TR1227_c1_g1,TR1832_c0_g1,TR10328_c0_g1,TR4768_c0_g1,TR5183_c0_g1,TR6217_c0_g1,TR5270_c0_g1,TR591_c0_g1	0.378453378125789	0.689325795871973	0.184210526315789
GO:0005737	cytoplasm	CC	36	206	270	1627	TR13706_c0_g1,TR3246_c0_g1,TR635_c0_g1,TR14438_c0_g1,TR4270_c0_g1,TR1758_c0_g1,TR7064_c0_g1,TR7166_c0_g1,TR83_c0_g1,TR1008_c1_g1,TR1589_c0_g1,TR18062_c0_g1,TR1817_c0_g1,TR2861_c0_g1,TR3800_c0_g1,TR4317_c0_g1,TR4839_c0_g1,TR1973_c0_g1,TR2704_c0_g1,TR365_c0_g2,TR3622_c0_g1,TR10464_c0_g1,TR547_c0_g3,TR6239_c0_g1,TR709_c0_g1,TR4761_c0_g1,TR3971_c0_g1,TR4378_c0_g1,TR849_c0_g1,TR1386_c0_g1,TR3076_c0_g1…	0.390201589036992	0.698881676021319	0.174757281553398
GO:0005634	nucleus	CC	18	100	270	1627	TR10975_c0_g1,TR4839_c0_g1,TR2699_c0_g1,TR1202_c0_g1,TR10320_c0_g1,TR1163_c0_g2,TR1738_c0_g1,TR18062_c0_g1,TR1817_c0_g1,TR2861_c0_g1,TR2890_c0_g1,TR3991_c0_g1,TR4378_c0_g1,TR5095_c0_g1,TR5275_c0_g1,TR8106_c0_g1,TR10278_c0_g1,TR1440_c0_g1	0.391139340336538	0.698881676021319	0.18
GO:0007010	cytoskeleton organization	BP	2	8	270	1627	TR4270_c0_g1,TR635_c0_g1	0.393236333575246	0.698881676021319	0.25
GO:0033365	protein localization to organelle	BP	2	8	270	1627	TR8106_c0_g1,TR4761_c0_g1	0.393236333575246	0.698881676021319	0.25
GO:0008483	transaminase activity	MF	2	8	270	1627	TR4305_c0_g1,TR3800_c0_g1	0.393236333575246	0.698881676021319	0.25
GO:0016627	oxidoreductase activity, acting on the CH-CH group of donors	MF	2	8	270	1627	TR13_c0_g1,TR7640_c0_g1	0.393236333575246	0.698881676021319	0.25
GO:0016769	transferase activity, transferring nitrogenous groups	MF	2	8	270	1627	TR4305_c0_g1,TR3800_c0_g1	0.393236333575246	0.698881676021319	0.25
GO:0044265	cellular macromolecule catabolic process	BP	3	14	270	1627	TR1589_c0_g1,TR12937_c0_g1,TR4378_c0_g1	0.417793040282022	0.698881676021319	0.214285714285714
GO:0016884	carbon-nitrogen ligase activity, with glutamine as amido-N-donor	MF	3	14	270	1627	TR16143_c0_g1,TR4889_c0_g1,TR5454_c0_g1	0.417793040282022	0.698881676021319	0.214285714285714
GO:0006414	translational elongation	BP	1	3	270	1627	TR365_c0_g2	0.420014183726538	0.698881676021319	0.333333333333333
GO:0006569	tryptophan catabolic process	BP	1	3	270	1627	TR6217_c0_g1	0.420014183726538	0.698881676021319	0.333333333333333
GO:0006613	cotranslational protein targeting to membrane	BP	1	3	270	1627	TR8106_c0_g1	0.420014183726538	0.698881676021319	0.333333333333333
GO:0006614	SRP-dependent cotranslational protein targeting to membrane	BP	1	3	270	1627	TR8106_c0_g1	0.420014183726538	0.698881676021319	0.333333333333333
GO:0006616	SRP-dependent cotranslational protein targeting to membrane, translocation	BP	1	3	270	1627	TR8106_c0_g1	0.420014183726538	0.698881676021319	0.333333333333333
GO:0006650	glycerophospholipid metabolic process	BP	1	3	270	1627	TR3622_c0_g1	0.420014183726538	0.698881676021319	0.333333333333333
GO:0007059	chromosome segregation	BP	1	3	270	1627	TR5275_c0_g1	0.420014183726538	0.698881676021319	0.333333333333333
GO:0009073	aromatic amino acid family biosynthetic process	BP	1	3	270	1627	TR10328_c0_g1	0.420014183726538	0.698881676021319	0.333333333333333
GO:0009113	purine nucleobase biosynthetic process	BP	1	3	270	1627	TR3800_c0_g1	0.420014183726538	0.698881676021319	0.333333333333333
GO:0009310	amine catabolic process	BP	1	3	270	1627	TR6217_c0_g1	0.420014183726538	0.698881676021319	0.333333333333333
GO:0019220	regulation of phosphate metabolic process	BP	1	3	270	1627	TR4270_c0_g1	0.420014183726538	0.698881676021319	0.333333333333333
GO:0019441	tryptophan catabolic process to kynurenine	BP	1	3	270	1627	TR6217_c0_g1	0.420014183726538	0.698881676021319	0.333333333333333
GO:0019725	cellular homeostasis	BP	1	3	270	1627	TR1758_c0_g1	0.420014183726538	0.698881676021319	0.333333333333333
GO:0023014	signal transduction by protein phosphorylation	BP	1	3	270	1627	TR3246_c0_g1	0.420014183726538	0.698881676021319	0.333333333333333
GO:0034248	regulation of cellular amide metabolic process	BP	1	3	270	1627	TR591_c0_g1	0.420014183726538	0.698881676021319	0.333333333333333
GO:0042325	regulation of phosphorylation	BP	1	3	270	1627	TR4270_c0_g1	0.420014183726538	0.698881676021319	0.333333333333333
GO:0042398	cellular modified amino acid biosynthetic process	BP	1	3	270	1627	TR5183_c0_g1	0.420014183726538	0.698881676021319	0.333333333333333
GO:0042402	cellular biogenic amine catabolic process	BP	1	3	270	1627	TR6217_c0_g1	0.420014183726538	0.698881676021319	0.333333333333333
GO:0042436	indole-containing compound catabolic process	BP	1	3	270	1627	TR6217_c0_g1	0.420014183726538	0.698881676021319	0.333333333333333
GO:0043161	proteasome-mediated ubiquitin-dependent protein catabolic process	BP	1	3	270	1627	TR4378_c0_g1	0.420014183726538	0.698881676021319	0.333333333333333
GO:0045047	protein targeting to ER	BP	1	3	270	1627	TR8106_c0_g1	0.420014183726538	0.698881676021319	0.333333333333333
GO:0046218	indolalkylamine catabolic process	BP	1	3	270	1627	TR6217_c0_g1	0.420014183726538	0.698881676021319	0.333333333333333
GO:0046486	glycerolipid metabolic process	BP	1	3	270	1627	TR3622_c0_g1	0.420014183726538	0.698881676021319	0.333333333333333
GO:0050793	regulation of developmental process	BP	1	3	270	1627	TR591_c0_g1	0.420014183726538	0.698881676021319	0.333333333333333
GO:0050801	ion homeostasis	BP	1	3	270	1627	TR1758_c0_g1	0.420014183726538	0.698881676021319	0.333333333333333
GO:0051174	regulation of phosphorus metabolic process	BP	1	3	270	1627	TR4270_c0_g1	0.420014183726538	0.698881676021319	0.333333333333333
GO:0065002	intracellular protein transmembrane transport	BP	1	3	270	1627	TR8106_c0_g1	0.420014183726538	0.698881676021319	0.333333333333333
GO:0070189	kynurenine metabolic process	BP	1	3	270	1627	TR6217_c0_g1	0.420014183726538	0.698881676021319	0.333333333333333
GO:0070972	protein localization to endoplasmic reticulum	BP	1	3	270	1627	TR8106_c0_g1	0.420014183726538	0.698881676021319	0.333333333333333
GO:0072599	establishment of protein localization to endoplasmic reticulum	BP	1	3	270	1627	TR8106_c0_g1	0.420014183726538	0.698881676021319	0.333333333333333
GO:1901987	regulation of cell cycle phase transition	BP	1	3	270	1627	TR5275_c0_g1	0.420014183726538	0.698881676021319	0.333333333333333
GO:1901990	regulation of mitotic cell cycle phase transition	BP	1	3	270	1627	TR5275_c0_g1	0.420014183726538	0.698881676021319	0.333333333333333
GO:0004061	arylformamidase activity	MF	1	3	270	1627	TR6217_c0_g1	0.420014183726538	0.698881676021319	0.333333333333333
GO:0004197	cysteine-type endopeptidase activity	MF	1	3	270	1627	TR1091_c0_g1	0.420014183726538	0.698881676021319	0.333333333333333
GO:0004674	protein serine/threonine kinase activity	MF	1	3	270	1627	TR3246_c0_g1	0.420014183726538	0.698881676021319	0.333333333333333
GO:0005509	calcium ion binding	MF	1	3	270	1627	TR4793_c0_g1	0.420014183726538	0.698881676021319	0.333333333333333
GO:0008080	N-acetyltransferase activity	MF	1	3	270	1627	TR6136_c0_g1	0.420014183726538	0.698881676021319	0.333333333333333
GO:0008536	Ran GTPase binding	MF	1	3	270	1627	TR3991_c0_g1	0.420014183726538	0.698881676021319	0.333333333333333
GO:0044877	protein-containing complex binding	MF	1	3	270	1627	TR591_c0_g1	0.420014183726538	0.698881676021319	0.333333333333333
GO:0000786	nucleosome	CC	1	3	270	1627	TR1738_c0_g1	0.420014183726538	0.698881676021319	0.333333333333333
GO:0031597	cytosolic proteasome complex	CC	1	3	270	1627	TR4378_c0_g1	0.420014183726538	0.698881676021319	0.333333333333333
GO:0033176	proton-transporting V-type ATPase complex	CC	1	3	270	1627	TR1758_c0_g1	0.420014183726538	0.698881676021319	0.333333333333333
GO:0044445	cytosolic part	CC	1	3	270	1627	TR4378_c0_g1	0.420014183726538	0.698881676021319	0.333333333333333
GO:0044815	DNA packaging complex	CC	1	3	270	1627	TR1738_c0_g1	0.420014183726538	0.698881676021319	0.333333333333333
GO:0015031	protein transport	BP	4	20	270	1627	TR8106_c0_g1,TR14438_c0_g1,TR3971_c0_g1,TR18062_c0_g1	0.430201683809728	0.713505231684427	0.2
GO:0045184	establishment of protein localization	BP	4	20	270	1627	TR8106_c0_g1,TR14438_c0_g1,TR3971_c0_g1,TR18062_c0_g1	0.430201683809728	0.713505231684427	0.2
GO:0006812	cation transport	BP	5	26	270	1627	TR4697_c0_g1,TR547_c0_g3,TR7064_c0_g1,TR10464_c0_g1,TR1758_c0_g1	0.437922318423545	0.72513111167535	0.192307692307692
GO:0016053	organic acid biosynthetic process	BP	6	32	270	1627	TR3800_c0_g1,TR1227_c1_g1,TR1832_c0_g1,TR10328_c0_g1,TR5183_c0_g1,TR591_c0_g1	0.443273483697148	0.73161642940306	0.1875
GO:0046394	carboxylic acid biosynthetic process	BP	6	32	270	1627	TR3800_c0_g1,TR1227_c1_g1,TR1832_c0_g1,TR10328_c0_g1,TR5183_c0_g1,TR591_c0_g1	0.443273483697148	0.73161642940306	0.1875
GO:0009072	aromatic amino acid family metabolic process	BP	2	9	270	1627	TR10328_c0_g1,TR6217_c0_g1	0.455276311251213	0.747796839736292	0.222222222222222
GO:1901615	organic hydroxy compound metabolic process	BP	2	9	270	1627	TR3335_c0_g1,TR18385_c0_g1	0.455276311251213	0.747796839736292	0.222222222222222
GO:0015630	microtubule cytoskeleton	CC	2	9	270	1627	TR420_c0_g1,TR420_c0_g2	0.455276311251213	0.747796839736292	0.222222222222222
GO:0046907	intracellular transport	BP	3	15	270	1627	TR8106_c0_g1,TR14438_c0_g1,TR3971_c0_g1	0.465148033651577	0.760338131930462	0.2
GO:0051649	establishment of localization in cell	BP	3	15	270	1627	TR8106_c0_g1,TR14438_c0_g1,TR3971_c0_g1	0.465148033651577	0.760338131930462	0.2
GO:0046983	protein dimerization activity	MF	3	15	270	1627	TR1738_c0_g1,TR264_c1_g3,TR264_c1_g4	0.465148033651577	0.760338131930462	0.2
GO:0007154	cell communication	BP	4	21	270	1627	TR3246_c0_g1,TR24_c2_g1,TR591_c0_g1,TR11397_c0_g1	0.470010103809522	0.761227174803033	0.19047619047619
GO:0007165	signal transduction	BP	4	21	270	1627	TR3246_c0_g1,TR591_c0_g1,TR11397_c0_g1,TR24_c2_g1	0.470010103809522	0.761227174803033	0.19047619047619
GO:0023052	signaling	BP	4	21	270	1627	TR3246_c0_g1,TR24_c2_g1,TR591_c0_g1,TR11397_c0_g1	0.470010103809522	0.761227174803033	0.19047619047619
GO:0005840	ribosome	CC	5	27	270	1627	TR4317_c0_g1,TR709_c0_g1,TR1973_c0_g1,TR2704_c0_g1,TR365_c0_g2	0.472953917771958	0.761227174803033	0.185185185185185
GO:1902494	catalytic complex	CC	5	27	270	1627	TR1202_c0_g1,TR1817_c0_g1,TR591_c0_g1,TR4378_c0_g1,TR1589_c0_g1	0.472953917771958	0.761227174803033	0.185185185185185
GO:0019752	carboxylic acid metabolic process	BP	13	75	270	1627	TR38_c0_g2,TR283_c0_g1,TR14307_c0_g1,TR1386_c0_g1,TR4305_c0_g1,TR3800_c0_g1,TR1227_c1_g1,TR1832_c0_g1,TR10328_c0_g1,TR5183_c0_g1,TR6217_c0_g1,TR591_c0_g1,TR5270_c0_g1	0.480249534620129	0.761227174803033	0.173333333333333
GO:0043436	oxoacid metabolic process	BP	13	75	270	1627	TR38_c0_g2,TR283_c0_g1,TR14307_c0_g1,TR1386_c0_g1,TR4305_c0_g1,TR3800_c0_g1,TR1227_c1_g1,TR1832_c0_g1,TR10328_c0_g1,TR5183_c0_g1,TR6217_c0_g1,TR5270_c0_g1,TR591_c0_g1	0.480249534620129	0.761227174803033	0.173333333333333
GO:0015318	inorganic molecular entity transmembrane transporter activity	MF	6	34	270	1627	TR1758_c0_g1,TR547_c0_g3,TR7064_c0_g1,TR10464_c0_g1,TR3407_c0_g1,TR4697_c0_g1	0.506076866762892	0.761227174803033	0.176470588235294
GO:0005506	iron ion binding	MF	5	28	270	1627	TR18385_c0_g1,TR1227_c1_g1,TR2607_c0_g1,TR547_c0_g3,TR2718_c0_g1	0.507266798166348	0.761227174803033	0.178571428571429
GO:0006753	nucleoside phosphate metabolic process	BP	4	22	270	1627	TR547_c0_g3,TR10464_c0_g1,TR6239_c0_g1,TR1758_c0_g1	0.508760931912269	0.761227174803033	0.181818181818182
GO:0009117	nucleotide metabolic process	BP	4	22	270	1627	TR547_c0_g3,TR10464_c0_g1,TR6239_c0_g1,TR1758_c0_g1	0.508760931912269	0.761227174803033	0.181818181818182
GO:1901565	organonitrogen compound catabolic process	BP	4	22	270	1627	TR1589_c0_g1,TR12937_c0_g1,TR4378_c0_g1,TR6217_c0_g1	0.508760931912269	0.761227174803033	0.181818181818182
GO:0003723	RNA binding	MF	4	22	270	1627	TR2699_c0_g1,TR2861_c0_g1,TR4317_c0_g1,TR709_c0_g1	0.508760931912269	0.761227174803033	0.181818181818182
GO:0006357	regulation of transcription by RNA polymerase II	BP	3	16	270	1627	TR10975_c0_g1,TR3246_c0_g1,TR5095_c0_g1	0.510738174481447	0.761227174803033	0.1875
GO:0006067	ethanol metabolic process	BP	1	4	270	1627	TR3335_c0_g1	0.516440397023234	0.761227174803033	0.25
GO:0006069	ethanol oxidation	BP	1	4	270	1627	TR3335_c0_g1	0.516440397023234	0.761227174803033	0.25
GO:0006144	purine nucleobase metabolic process	BP	1	4	270	1627	TR3800_c0_g1	0.516440397023234	0.761227174803033	0.25
GO:0006568	tryptophan metabolic process	BP	1	4	270	1627	TR6217_c0_g1	0.516440397023234	0.761227174803033	0.25
GO:0006575	cellular modified amino acid metabolic process	BP	1	4	270	1627	TR5183_c0_g1	0.516440397023234	0.761227174803033	0.25
GO:0006586	indolalkylamine metabolic process	BP	1	4	270	1627	TR6217_c0_g1	0.516440397023234	0.761227174803033	0.25
GO:0006612	protein targeting to membrane	BP	1	4	270	1627	TR8106_c0_g1	0.516440397023234	0.761227174803033	0.25
GO:0006754	ATP biosynthetic process	BP	1	4	270	1627	TR10464_c0_g1	0.516440397023234	0.761227174803033	0.25
GO:0007275	multicellular organism development	BP	1	4	270	1627	TR591_c0_g1	0.516440397023234	0.761227174803033	0.25
GO:0007346	regulation of mitotic cell cycle	BP	1	4	270	1627	TR5275_c0_g1	0.516440397023234	0.761227174803033	0.25
GO:0009069	serine family amino acid metabolic process	BP	1	4	270	1627	TR3800_c0_g1	0.516440397023234	0.761227174803033	0.25
GO:0009142	nucleoside triphosphate biosynthetic process	BP	1	4	270	1627	TR10464_c0_g1	0.516440397023234	0.761227174803033	0.25
GO:0009145	purine nucleoside triphosphate biosynthetic process	BP	1	4	270	1627	TR10464_c0_g1	0.516440397023234	0.761227174803033	0.25
GO:0009201	ribonucleoside triphosphate biosynthetic process	BP	1	4	270	1627	TR10464_c0_g1	0.516440397023234	0.761227174803033	0.25
GO:0009206	purine ribonucleoside triphosphate biosynthetic process	BP	1	4	270	1627	TR10464_c0_g1	0.516440397023234	0.761227174803033	0.25
GO:0009653	anatomical structure morphogenesis	BP	1	4	270	1627	TR420_c0_g1	0.516440397023234	0.761227174803033	0.25
GO:0010564	regulation of cell cycle process	BP	1	4	270	1627	TR5275_c0_g1	0.516440397023234	0.761227174803033	0.25
GO:0015698	inorganic anion transport	BP	1	4	270	1627	TR3407_c0_g1	0.516440397023234	0.761227174803033	0.25
GO:0031123	RNA 3'-end processing	BP	1	4	270	1627	TR2699_c0_g1	0.516440397023234	0.761227174803033	0.25
GO:0031399	regulation of protein modification process	BP	1	4	270	1627	TR4270_c0_g1	0.516440397023234	0.761227174803033	0.25
GO:0042430	indole-containing compound metabolic process	BP	1	4	270	1627	TR6217_c0_g1	0.516440397023234	0.761227174803033	0.25
GO:0042440	pigment metabolic process	BP	1	4	270	1627	TR3800_c0_g1	0.516440397023234	0.761227174803033	0.25
GO:0042537	benzene-containing compound metabolic process	BP	1	4	270	1627	TR6217_c0_g1	0.516440397023234	0.761227174803033	0.25
GO:0044770	cell cycle phase transition	BP	1	4	270	1627	TR5275_c0_g1	0.516440397023234	0.761227174803033	0.25
GO:0044772	mitotic cell cycle phase transition	BP	1	4	270	1627	TR5275_c0_g1	0.516440397023234	0.761227174803033	0.25
GO:0045944	positive regulation of transcription by RNA polymerase II	BP	1	4	270	1627	TR10975_c0_g1	0.516440397023234	0.761227174803033	0.25
GO:0046148	pigment biosynthetic process	BP	1	4	270	1627	TR3800_c0_g1	0.516440397023234	0.761227174803033	0.25
GO:0048731	system development	BP	1	4	270	1627	TR591_c0_g1	0.516440397023234	0.761227174803033	0.25
GO:0051640	organelle localization	BP	1	4	270	1627	TR14438_c0_g1	0.516440397023234	0.761227174803033	0.25
GO:0071806	protein transmembrane transport	BP	1	4	270	1627	TR8106_c0_g1	0.516440397023234	0.761227174803033	0.25
GO:0072657	protein localization to membrane	BP	1	4	270	1627	TR8106_c0_g1	0.516440397023234	0.761227174803033	0.25
GO:0090150	establishment of protein localization to membrane	BP	1	4	270	1627	TR8106_c0_g1	0.516440397023234	0.761227174803033	0.25
GO:0004523	RNA-DNA hybrid ribonuclease activity	MF	1	4	270	1627	TR1903_c0_g4	0.516440397023234	0.761227174803033	0.25
GO:0008137	NADH dehydrogenase (ubiquinone) activity	MF	1	4	270	1627	TR6239_c0_g1	0.516440397023234	0.761227174803033	0.25
GO:0008238	exopeptidase activity	MF	1	4	270	1627	TR4857_c0_g1	0.516440397023234	0.761227174803033	0.25
GO:0015103	inorganic anion transmembrane transporter activity	MF	1	4	270	1627	TR3407_c0_g1	0.516440397023234	0.761227174803033	0.25
GO:0015299	solute:proton antiporter activity	MF	1	4	270	1627	TR4697_c0_g1	0.516440397023234	0.761227174803033	0.25
GO:0016811	hydrolase activity, acting on carbon-nitrogen (but not peptide) bonds, in linear amides	MF	1	4	270	1627	TR6217_c0_g1	0.516440397023234	0.761227174803033	0.25
GO:0016813	hydrolase activity, acting on carbon-nitrogen (but not peptide) bonds, in linear amidines	MF	1	4	270	1627	TR4865_c0_g1	0.516440397023234	0.761227174803033	0.25
GO:0017016	Ras GTPase binding	MF	1	4	270	1627	TR3991_c0_g1	0.516440397023234	0.761227174803033	0.25
GO:0019829	cation-transporting ATPase activity	MF	1	4	270	1627	TR1758_c0_g1	0.516440397023234	0.761227174803033	0.25
GO:0022853	active ion transmembrane transporter activity	MF	1	4	270	1627	TR1758_c0_g1	0.516440397023234	0.761227174803033	0.25
GO:0031267	small GTPase binding	MF	1	4	270	1627	TR3991_c0_g1	0.516440397023234	0.761227174803033	0.25
GO:0042625	ATPase coupled ion transmembrane transporter activity	MF	1	4	270	1627	TR1758_c0_g1	0.516440397023234	0.761227174803033	0.25
GO:0051787	misfolded protein binding	MF	1	4	270	1627	TR4839_c0_g1	0.516440397023234	0.761227174803033	0.25
GO:0051903	S-(hydroxymethyl)glutathione dehydrogenase activity	MF	1	4	270	1627	TR3335_c0_g1	0.516440397023234	0.761227174803033	0.25
GO:0000139	Golgi membrane	CC	1	4	270	1627	TR14438_c0_g1	0.516440397023234	0.761227174803033	0.25
GO:0000322	storage vacuole	CC	1	4	270	1627	TR1758_c0_g1	0.516440397023234	0.761227174803033	0.25
GO:0000323	lytic vacuole	CC	1	4	270	1627	TR1758_c0_g1	0.516440397023234	0.761227174803033	0.25
GO:0000324	fungal-type vacuole	CC	1	4	270	1627	TR1758_c0_g1	0.516440397023234	0.761227174803033	0.25
GO:0016469	proton-transporting two-sector ATPase complex	CC	1	4	270	1627	TR1758_c0_g1	0.516440397023234	0.761227174803033	0.25
GO:0044432	endoplasmic reticulum part	CC	1	4	270	1627	TR849_c0_g1	0.516440397023234	0.761227174803033	0.25
GO:0098791	Golgi subcompartment	CC	1	4	270	1627	TR14438_c0_g1	0.516440397023234	0.761227174803033	0.25
GO:0098797	plasma membrane protein complex	CC	1	4	270	1627	TR591_c0_g1	0.516440397023234	0.761227174803033	0.25
GO:0044281	small molecule metabolic process	BP	19	114	270	1627	TR3335_c0_g1,TR38_c0_g2,TR283_c0_g1,TR547_c0_g3,TR14307_c0_g1,TR1386_c0_g1,TR4305_c0_g1,TR3800_c0_g1,TR1227_c1_g1,TR1832_c0_g1,TR10328_c0_g1,TR4768_c0_g1,TR5183_c0_g1,TR10464_c0_g1,TR6217_c0_g1,TR5270_c0_g1,TR6239_c0_g1,TR1758_c0_g1,TR591_c0_g1	0.533527799672534	0.785279012505029	0.166666666666667
GO:0019538	protein metabolic process	BP	18	108	270	1627	TR3246_c0_g1,TR14446_c0_g1,TR1973_c0_g1,TR4317_c0_g1,TR709_c0_g1,TR365_c0_g2,TR14307_c0_g1,TR1386_c0_g1,TR2813_c0_g1,TR1091_c0_g1,TR4857_c0_g1,TR1589_c0_g1,TR12937_c0_g1,TR4378_c0_g1,TR1758_c0_g1,TR5275_c0_g1,TR4270_c0_g1,TR4839_c0_g1	0.53474734919174	0.785939908033969	0.166666666666667
GO:0034220	ion transmembrane transport	BP	5	29	270	1627	TR4697_c0_g1,TR547_c0_g3,TR7064_c0_g1,TR10464_c0_g1,TR1758_c0_g1	0.540664096177899	0.792352554743472	0.172413793103448
GO:0042221	response to chemical	BP	5	29	270	1627	TR3246_c0_g1,TR591_c0_g1,TR4839_c0_g1,TR16620_c0_g1,TR16623_c0_g1	0.540664096177899	0.792352554743472	0.172413793103448
GO:0003735	structural constituent of ribosome	MF	4	23	270	1627	TR1973_c0_g1,TR365_c0_g2,TR4317_c0_g1,TR709_c0_g1	0.546194015835886	0.799308315857395	0.173913043478261
GO:0051716	cellular response to stimulus	BP	9	54	270	1627	TR3246_c0_g1,TR24_c2_g1,TR4856_c1_g1,TR591_c0_g1,TR11397_c0_g1,TR1817_c0_g1,TR4839_c0_g1,TR16620_c0_g1,TR16623_c0_g1	0.552865085903502	0.807911730116866	0.166666666666667
GO:0051128	regulation of cellular component organization	BP	2	11	270	1627	TR5275_c0_g1,TR3246_c0_g1	0.567491423744535	0.828099073275287	0.181818181818182
GO:0019637	organophosphate metabolic process	BP	5	30	270	1627	TR547_c0_g3,TR3622_c0_g1,TR10464_c0_g1,TR6239_c0_g1,TR1758_c0_g1	0.572980475382717	0.828329778411428	0.166666666666667
GO:0044267	cellular protein metabolic process	BP	14	86	270	1627	TR3246_c0_g1,TR14446_c0_g1,TR1973_c0_g1,TR4317_c0_g1,TR709_c0_g1,TR365_c0_g2,TR14307_c0_g1,TR1386_c0_g1,TR1589_c0_g1,TR12937_c0_g1,TR4378_c0_g1,TR4270_c0_g1,TR1758_c0_g1,TR5275_c0_g1	0.579651174519478	0.828329778411428	0.162790697674419
GO:0016614	oxidoreductase activity, acting on CH-OH group of donors	MF	4	24	270	1627	TR3335_c0_g1,TR5183_c0_g1,TR1832_c0_g1,TR3095_c0_g1	0.582103171841666	0.828329778411428	0.166666666666667
GO:0015075	ion transmembrane transporter activity	MF	6	37	270	1627	TR1758_c0_g1,TR547_c0_g3,TR7064_c0_g1,TR10464_c0_g1,TR3407_c0_g1,TR4697_c0_g1	0.594884501518289	0.828329778411428	0.162162162162162
GO:0016853	isomerase activity	MF	3	18	270	1627	TR14446_c0_g1,TR1714_c0_g1,TR4678_c0_g2	0.595299489974699	0.828329778411428	0.166666666666667
GO:0006066	alcohol metabolic process	BP	1	5	270	1627	TR3335_c0_g1	0.596884693267058	0.828329778411428	0.2
GO:0006367	transcription initiation from RNA polymerase II promoter	BP	1	5	270	1627	TR10320_c0_g1	0.596884693267058	0.828329778411428	0.2
GO:0006576	cellular biogenic amine metabolic process	BP	1	5	270	1627	TR6217_c0_g1	0.596884693267058	0.828329778411428	0.2
GO:0006979	response to oxidative stress	BP	1	5	270	1627	TR3246_c0_g1	0.596884693267058	0.828329778411428	0.2
GO:0007264	small GTPase mediated signal transduction	BP	1	5	270	1627	TR11397_c0_g1	0.596884693267058	0.828329778411428	0.2
GO:0009074	aromatic amino acid family catabolic process	BP	1	5	270	1627	TR6217_c0_g1	0.596884693267058	0.828329778411428	0.2
GO:0010557	positive regulation of macromolecule biosynthetic process	BP	1	5	270	1627	TR10975_c0_g1	0.596884693267058	0.828329778411428	0.2
GO:0010628	positive regulation of gene expression	BP	1	5	270	1627	TR10975_c0_g1	0.596884693267058	0.828329778411428	0.2
GO:0034308	primary alcohol metabolic process	BP	1	5	270	1627	TR3335_c0_g1	0.596884693267058	0.828329778411428	0.2
GO:0042026	protein refolding	BP	1	5	270	1627	TR4839_c0_g1	0.596884693267058	0.828329778411428	0.2
GO:0042493	response to drug	BP	1	5	270	1627	TR591_c0_g1	0.596884693267058	0.828329778411428	0.2
GO:0043335	protein unfolding	BP	1	5	270	1627	TR4839_c0_g1	0.596884693267058	0.828329778411428	0.2
GO:0045893	positive regulation of transcription, DNA-templated	BP	1	5	270	1627	TR10975_c0_g1	0.596884693267058	0.828329778411428	0.2
GO:0045935	positive regulation of nucleobase-containing compound metabolic process	BP	1	5	270	1627	TR10975_c0_g1	0.596884693267058	0.828329778411428	0.2
GO:0046112	nucleobase biosynthetic process	BP	1	5	270	1627	TR3800_c0_g1	0.596884693267058	0.828329778411428	0.2
GO:0048878	chemical homeostasis	BP	1	5	270	1627	TR1758_c0_g1	0.596884693267058	0.828329778411428	0.2
GO:0051254	positive regulation of RNA metabolic process	BP	1	5	270	1627	TR10975_c0_g1	0.596884693267058	0.828329778411428	0.2
GO:0051788	response to misfolded protein	BP	1	5	270	1627	TR4839_c0_g1	0.596884693267058	0.828329778411428	0.2
GO:0071218	cellular response to misfolded protein	BP	1	5	270	1627	TR4839_c0_g1	0.596884693267058	0.828329778411428	0.2
GO:0090502	RNA phosphodiester bond hydrolysis, endonucleolytic	BP	1	5	270	1627	TR1903_c0_g4	0.596884693267058	0.828329778411428	0.2
GO:1902680	positive regulation of RNA biosynthetic process	BP	1	5	270	1627	TR10975_c0_g1	0.596884693267058	0.828329778411428	0.2
GO:1903508	positive regulation of nucleic acid-templated transcription	BP	1	5	270	1627	TR10975_c0_g1	0.596884693267058	0.828329778411428	0.2
GO:0003995	acyl-CoA dehydrogenase activity	MF	1	5	270	1627	TR13_c0_g1	0.596884693267058	0.828329778411428	0.2
GO:0015298	solute:cation antiporter activity	MF	1	5	270	1627	TR4697_c0_g1	0.596884693267058	0.828329778411428	0.2
GO:0016407	acetyltransferase activity	MF	1	5	270	1627	TR6136_c0_g1	0.596884693267058	0.828329778411428	0.2
GO:0016702	oxidoreductase activity, acting on single donors with incorporation of molecular oxygen, incorporation of two atoms of oxygen	MF	1	5	270	1627	TR18385_c0_g1	0.596884693267058	0.828329778411428	0.2
GO:0043565	sequence-specific DNA binding	MF	1	5	270	1627	TR2861_c0_g1	0.596884693267058	0.828329778411428	0.2
GO:0046982	protein heterodimerization activity	MF	1	5	270	1627	TR1738_c0_g1	0.596884693267058	0.828329778411428	0.2
GO:0051020	GTPase binding	MF	1	5	270	1627	TR3991_c0_g1	0.596884693267058	0.828329778411428	0.2
GO:0005773	vacuole	CC	1	5	270	1627	TR1758_c0_g1	0.596884693267058	0.828329778411428	0.2
GO:0032993	protein-DNA complex	CC	1	5	270	1627	TR1738_c0_g1	0.596884693267058	0.828329778411428	0.2
GO:0055086	nucleobase-containing small molecule metabolic process	BP	5	31	270	1627	TR547_c0_g3,TR3800_c0_g1,TR10464_c0_g1,TR6239_c0_g1,TR1758_c0_g1	0.604081157262794	0.835483789095971	0.161290322580645
GO:0005623	cell	CC	61	375	270	1627	TR1136_c0_g1,TR14438_c0_g1,TR4270_c0_g1,TR11397_c0_g1,TR1091_c0_g1,TR1324_c0_g1,TR591_c0_g1,TR1758_c0_g1,TR10975_c0_g1,TR1738_c0_g1,TR7064_c0_g1,TR7166_c0_g1,TR83_c0_g1,TR1008_c1_g1,TR1589_c0_g1,TR18062_c0_g1,TR1817_c0_g1,TR2861_c0_g1,TR3800_c0_g1,TR4317_c0_g1,TR4839_c0_g1,TR1973_c0_g1,TR2704_c0_g1,TR365_c0_g2,TR10320_c0_g1,TR1163_c0_g2,TR2890_c0_g1,TR3991_c0_g1,TR4378_c0_g1,TR5095_c0_g1,TR5275_c…	0.604497094463556	0.835483789095971	0.162666666666667
GO:0044464	cell part	CC	61	375	270	1627	TR1136_c0_g1,TR11397_c0_g1,TR1091_c0_g1,TR1324_c0_g1,TR635_c0_g1,TR3593_c0_g1,TR3649_c0_g1,TR452_c1_g1,TR4090_c0_g3,TR421_c0_g1,TR591_c0_g1,TR10975_c0_g1,TR1386_c0_g1,TR3076_c0_g1,TR3991_c0_g1,TR420_c0_g1,TR420_c0_g2,TR8106_c0_g1,TR5183_c0_g1,TR1589_c0_g1,TR4378_c0_g1,TR11224_c0_g1,TR4635_c0_g1,TR4856_c1_g1,TR13706_c0_g1,TR3246_c0_g1,TR10320_c0_g1,TR5275_c0_g1,TR4270_c0_g1,TR10464_c0_g1,TR547_c0_…	0.604497094463556	0.835483789095971	0.162666666666667
GO:0006520	cellular amino acid metabolic process	BP	7	44	270	1627	TR14307_c0_g1,TR1386_c0_g1,TR3800_c0_g1,TR1832_c0_g1,TR10328_c0_g1,TR6217_c0_g1,TR4305_c0_g1	0.613626071561156	0.846953441126358	0.159090909090909
GO:0006366	transcription by RNA polymerase II	BP	4	25	270	1627	TR3246_c0_g1,TR5095_c0_g1,TR10320_c0_g1,TR10975_c0_g1	0.616332236331267	0.848198403744106	0.16
GO:0033554	cellular response to stress	BP	4	25	270	1627	TR4856_c1_g1,TR3246_c0_g1,TR1817_c0_g1,TR4839_c0_g1	0.616332236331267	0.848198403744106	0.16
GO:0065008	regulation of biological quality	BP	2	12	270	1627	TR10975_c0_g1,TR1758_c0_g1	0.617022760370713	0.848198403744106	0.166666666666667
GO:0008652	cellular amino acid biosynthetic process	BP	3	19	270	1627	TR3800_c0_g1,TR10328_c0_g1,TR1832_c0_g1	0.633858280434143	0.869002101065419	0.157894736842105
GO:0044085	cellular component biogenesis	BP	5	32	270	1627	TR4270_c0_g1,TR14438_c0_g1,TR420_c0_g1,TR4378_c0_g1,TR635_c0_g1	0.633860356071247	0.869002101065419	0.15625
GO:0016787	hydrolase activity	MF	36	227	270	1627	TR1758_c0_g1,TR420_c0_g1,TR420_c0_g2,TR4270_c0_g1,TR591_c0_g1,TR2813_c0_g1,TR6217_c0_g1,TR1589_c0_g1,TR4857_c0_g1,TR1091_c0_g1,TR12937_c0_g1,TR4378_c0_g1,TR2858_c0_g1,TR14507_c0_g1,TR3636_c0_g1,TR1903_c0_g4,TR1390_c0_g1,TR16714_c0_g1,TR5848_c0_g1,TR4839_c0_g1,TR3241_c0_g1,TR3332_c0_g1,TR4865_c0_g1,TR18129_c0_g1,TR10464_c0_g1,TR12998_c0_g1,TR13706_c0_g1,TR2747_c0_g1,TR3076_c0_g1,TR5498_c0_g1,TR763…	0.657048052778469	0.876154578461902	0.158590308370044
GO:0006418	tRNA aminoacylation for protein translation	BP	2	13	270	1627	TR1386_c0_g1,TR14307_c0_g1	0.662090282195961	0.876154578461902	0.153846153846154
GO:0043038	amino acid activation	BP	2	13	270	1627	TR14307_c0_g1,TR1386_c0_g1	0.662090282195961	0.876154578461902	0.153846153846154
GO:0043039	tRNA aminoacylation	BP	2	13	270	1627	TR14307_c0_g1,TR1386_c0_g1	0.662090282195961	0.876154578461902	0.153846153846154
GO:0004812	aminoacyl-tRNA ligase activity	MF	2	13	270	1627	TR1386_c0_g1,TR14307_c0_g1	0.662090282195961	0.876154578461902	0.153846153846154
GO:0016875	ligase activity, forming carbon-oxygen bonds	MF	2	13	270	1627	TR14307_c0_g1,TR1386_c0_g1	0.662090282195961	0.876154578461902	0.153846153846154
GO:0006259	DNA metabolic process	BP	5	33	270	1627	TR14507_c0_g1,TR3636_c0_g1,TR10975_c0_g1,TR1817_c0_g1,TR1163_c0_g2	0.66223927907366	0.876154578461902	0.151515151515152
GO:0006081	cellular aldehyde metabolic process	BP	1	6	270	1627	TR38_c0_g2	0.663987734461814	0.876154578461902	0.166666666666667
GO:0006397	mRNA processing	BP	1	6	270	1627	TR2699_c0_g1	0.663987734461814	0.876154578461902	0.166666666666667
GO:0006400	tRNA modification	BP	1	6	270	1627	TR10975_c0_g1	0.663987734461814	0.876154578461902	0.166666666666667
GO:0006633	fatty acid biosynthetic process	BP	1	6	270	1627	TR1227_c1_g1	0.663987734461814	0.876154578461902	0.166666666666667
GO:0009110	vitamin biosynthetic process	BP	1	6	270	1627	TR5183_c0_g1	0.663987734461814	0.876154578461902	0.166666666666667
GO:0018193	peptidyl-amino acid modification	BP	1	6	270	1627	TR14446_c0_g1	0.663987734461814	0.876154578461902	0.166666666666667
GO:0030036	actin cytoskeleton organization	BP	1	6	270	1627	TR635_c0_g1	0.663987734461814	0.876154578461902	0.166666666666667
GO:0032501	multicellular organismal process	BP	1	6	270	1627	TR591_c0_g1	0.663987734461814	0.876154578461902	0.166666666666667
GO:0042364	water-soluble vitamin biosynthetic process	BP	1	6	270	1627	TR5183_c0_g1	0.663987734461814	0.876154578461902	0.166666666666667
GO:0070647	protein modification by small protein conjugation or removal	BP	1	6	270	1627	TR12937_c0_g1	0.663987734461814	0.876154578461902	0.166666666666667
GO:1901606	alpha-amino acid catabolic process	BP	1	6	270	1627	TR6217_c0_g1	0.663987734461814	0.876154578461902	0.166666666666667
GO:0003954	NADH dehydrogenase activity	MF	1	6	270	1627	TR6239_c0_g1	0.663987734461814	0.876154578461902	0.166666666666667
GO:0004521	endoribonuclease activity	MF	1	6	270	1627	TR1903_c0_g4	0.663987734461814	0.876154578461902	0.166666666666667
GO:0004540	ribonuclease activity	MF	1	6	270	1627	TR1903_c0_g4	0.663987734461814	0.876154578461902	0.166666666666667
GO:0016410	N-acyltransferase activity	MF	1	6	270	1627	TR6136_c0_g1	0.663987734461814	0.876154578461902	0.166666666666667
GO:0016655	oxidoreductase activity, acting on NAD(P)H, quinone or similar compound as acceptor	MF	1	6	270	1627	TR6239_c0_g1	0.663987734461814	0.876154578461902	0.166666666666667
GO:0016891	endoribonuclease activity, producing 5'-phosphomonoesters	MF	1	6	270	1627	TR1903_c0_g4	0.663987734461814	0.876154578461902	0.166666666666667
GO:0016893	endonuclease activity, active with either ribo- or deoxyribonucleic acids and producing 5'-phosphomonoesters	MF	1	6	270	1627	TR1903_c0_g4	0.663987734461814	0.876154578461902	0.166666666666667
GO:0019899	enzyme binding	MF	1	6	270	1627	TR3991_c0_g1	0.663987734461814	0.876154578461902	0.166666666666667
GO:0050136	NADH dehydrogenase (quinone) activity	MF	1	6	270	1627	TR6239_c0_g1	0.663987734461814	0.876154578461902	0.166666666666667
GO:0052689	carboxylic ester hydrolase activity	MF	1	6	270	1627	TR18129_c0_g1	0.663987734461814	0.876154578461902	0.166666666666667
GO:0031984	organelle subcompartment	CC	1	6	270	1627	TR14438_c0_g1	0.663987734461814	0.876154578461902	0.166666666666667
GO:0032787	monocarboxylic acid metabolic process	BP	4	27	270	1627	TR38_c0_g2,TR1227_c1_g1,TR5183_c0_g1,TR591_c0_g1	0.679347183302124	0.895263729933031	0.148148148148148
GO:0017111	nucleoside-triphosphatase activity	MF	8	54	270	1627	TR1758_c0_g1,TR420_c0_g1,TR420_c0_g2,TR4270_c0_g1,TR591_c0_g1,TR14507_c0_g1,TR3636_c0_g1,TR4839_c0_g1	0.696628528346894	0.909980589217473	0.148148148148148
GO:0006974	cellular response to DNA damage stimulus	BP	2	14	270	1627	TR1817_c0_g1,TR4856_c1_g1	0.702806489181618	0.909980589217473	0.142857142857143
GO:0072522	purine-containing compound biosynthetic process	BP	2	14	270	1627	TR3800_c0_g1,TR10464_c0_g1	0.702806489181618	0.909980589217473	0.142857142857143
GO:0004386	helicase activity	MF	2	14	270	1627	TR14507_c0_g1,TR3636_c0_g1	0.702806489181618	0.909980589217473	0.142857142857143
GO:0006399	tRNA metabolic process	BP	3	21	270	1627	TR10975_c0_g1,TR14307_c0_g1,TR1386_c0_g1	0.703095609176606	0.909980589217473	0.142857142857143
GO:0051171	regulation of nitrogen compound metabolic process	BP	11	74	270	1627	TR4856_c1_g1,TR1103_c0_g1,TR2079_c0_g2,TR792_c0_g1,TR8357_c0_g1,TR3246_c0_g1,TR5095_c0_g1,TR421_c0_g1,TR4270_c0_g1,TR10975_c0_g1,TR591_c0_g1	0.707617682470976	0.909980589217473	0.148648648648649
GO:0009057	macromolecule catabolic process	BP	4	28	270	1627	TR16714_c0_g1,TR1589_c0_g1,TR12937_c0_g1,TR4378_c0_g1	0.70802724749142	0.909980589217473	0.142857142857143
GO:0008152	metabolic process	BP	116	721	270	1627	TR14507_c0_g1,TR3636_c0_g1,TR3246_c0_g1,TR16714_c0_g1,TR14446_c0_g1,TR10975_c0_g1,TR1243_c0_g1,TR1390_c0_g1,TR17046_c0_g1,TR4640_c0_g1,TR5848_c0_g1,TR3335_c0_g1,TR38_c0_g2,TR283_c0_g1,TR1227_c1_g1,TR12812_c0_g1,TR13_c0_g1,TR15031_c0_g1,TR16469_c0_g1,TR16620_c0_g1,TR18385_c0_g1,TR2262_c0_g1,TR2607_c0_g1,TR4711_c0_g2,TR550_c0_g1,TR7112_c0_g1,TR745_c0_g1,TR971_c0_g1,TR155_c0_g1,TR16413_c0_g1,TR16623…	0.710689285882642	0.909980589217473	0.160887656033287
GO:1990904	ribonucleoprotein complex	CC	5	35	270	1627	TR1973_c0_g1,TR2704_c0_g1,TR365_c0_g2,TR4317_c0_g1,TR709_c0_g1	0.714602155901835	0.909980589217473	0.142857142857143
GO:0043604	amide biosynthetic process	BP	8	55	270	1627	TR1973_c0_g1,TR4317_c0_g1,TR709_c0_g1,TR365_c0_g2,TR14307_c0_g1,TR1386_c0_g1,TR5183_c0_g1,TR591_c0_g1	0.717023098748299	0.909980589217473	0.145454545454545
GO:0016462	pyrophosphatase activity	MF	8	55	270	1627	TR1758_c0_g1,TR420_c0_g1,TR420_c0_g2,TR4270_c0_g1,TR591_c0_g1,TR14507_c0_g1,TR3636_c0_g1,TR4839_c0_g1	0.717023098748299	0.909980589217473	0.145454545454545
GO:0016817	hydrolase activity, acting on acid anhydrides	MF	8	55	270	1627	TR1758_c0_g1,TR420_c0_g1,TR420_c0_g2,TR4270_c0_g1,TR591_c0_g1,TR14507_c0_g1,TR3636_c0_g1,TR4839_c0_g1	0.717023098748299	0.909980589217473	0.145454545454545
GO:0016818	hydrolase activity, acting on acid anhydrides, in phosphorus-containing anhydrides	MF	8	55	270	1627	TR1758_c0_g1,TR420_c0_g1,TR420_c0_g2,TR4270_c0_g1,TR591_c0_g1,TR14507_c0_g1,TR3636_c0_g1,TR4839_c0_g1	0.717023098748299	0.909980589217473	0.145454545454545
GO:0006261	DNA-dependent DNA replication	BP	1	7	270	1627	TR1817_c0_g1	0.719955230880883	0.909980589217473	0.142857142857143
GO:0006605	protein targeting	BP	1	7	270	1627	TR8106_c0_g1	0.719955230880883	0.909980589217473	0.142857142857143
GO:0006766	vitamin metabolic process	BP	1	7	270	1627	TR5183_c0_g1	0.719955230880883	0.909980589217473	0.142857142857143
GO:0006767	water-soluble vitamin metabolic process	BP	1	7	270	1627	TR5183_c0_g1	0.719955230880883	0.909980589217473	0.142857142857143
GO:0008033	tRNA processing	BP	1	7	270	1627	TR10975_c0_g1	0.719955230880883	0.909980589217473	0.142857142857143
GO:0008643	carbohydrate transport	BP	1	7	270	1627	TR108_c0_g1	0.719955230880883	0.909980589217473	0.142857142857143
GO:0009112	nucleobase metabolic process	BP	1	7	270	1627	TR3800_c0_g1	0.719955230880883	0.909980589217473	0.142857142857143
GO:0009451	RNA modification	BP	1	7	270	1627	TR10975_c0_g1	0.719955230880883	0.909980589217473	0.142857142857143
GO:0030029	actin filament-based process	BP	1	7	270	1627	TR635_c0_g1	0.719955230880883	0.909980589217473	0.142857142857143
GO:0035966	response to topologically incorrect protein	BP	1	7	270	1627	TR4839_c0_g1	0.719955230880883	0.909980589217473	0.142857142857143
GO:0035967	cellular response to topologically incorrect protein	BP	1	7	270	1627	TR4839_c0_g1	0.719955230880883	0.909980589217473	0.142857142857143
GO:0043085	positive regulation of catalytic activity	BP	1	7	270	1627	TR4270_c0_g1	0.719955230880883	0.909980589217473	0.142857142857143
GO:0072594	establishment of protein localization to organelle	BP	1	7	270	1627	TR8106_c0_g1	0.719955230880883	0.909980589217473	0.142857142857143
GO:0000981	DNA-binding transcription factor activity, RNA polymerase II-specific	MF	1	7	270	1627	TR5095_c0_g1	0.719955230880883	0.909980589217473	0.142857142857143
GO:0016651	oxidoreductase activity, acting on NAD(P)H	MF	1	7	270	1627	TR6239_c0_g1	0.719955230880883	0.909980589217473	0.142857142857143
GO:0016836	hydro-lyase activity	MF	1	7	270	1627	TR3332_c0_g1	0.719955230880883	0.909980589217473	0.142857142857143
GO:0030170	pyridoxal phosphate binding	MF	1	7	270	1627	TR4305_c0_g1	0.719955230880883	0.909980589217473	0.142857142857143
GO:0030246	carbohydrate binding	MF	1	7	270	1627	TR4242_c0_g1	0.719955230880883	0.909980589217473	0.142857142857143
GO:0070279	vitamin B6 binding	MF	1	7	270	1627	TR4305_c0_g1	0.719955230880883	0.909980589217473	0.142857142857143
GO:0005783	endoplasmic reticulum	CC	1	7	270	1627	TR849_c0_g1	0.719955230880883	0.909980589217473	0.142857142857143
GO:0006807	nitrogen compound metabolic process	BP	57	364	270	1627	TR14507_c0_g1,TR3636_c0_g1,TR3246_c0_g1,TR14446_c0_g1,TR10975_c0_g1,TR1243_c0_g1,TR547_c0_g3,TR1817_c0_g1,TR6610_c0_g1,TR8315_c0_g1,TR484_c0_g1,TR4856_c1_g1,TR1103_c0_g1,TR2079_c0_g2,TR792_c0_g1,TR8357_c0_g1,TR5095_c0_g1,TR10320_c0_g1,TR2699_c0_g1,TR1973_c0_g1,TR4317_c0_g1,TR709_c0_g1,TR365_c0_g2,TR14307_c0_g1,TR1386_c0_g1,TR2813_c0_g1,TR1091_c0_g1,TR4857_c0_g1,TR1589_c0_g1,TR12937_c0_g1,TR4305_c…	0.731835864170376	0.923852204769534	0.156593406593407
GO:0016879	ligase activity, forming carbon-nitrogen bonds	MF	3	22	270	1627	TR16143_c0_g1,TR4889_c0_g1,TR5454_c0_g1	0.733780031902554	0.925161474092219	0.136363636363636
GO:1901135	carbohydrate derivative metabolic process	BP	4	29	270	1627	TR547_c0_g3,TR10464_c0_g1,TR6239_c0_g1,TR1758_c0_g1	0.734805351701583	0.925310442883475	0.137931034482759
GO:0031323	regulation of cellular metabolic process	BP	11	77	270	1627	TR4856_c1_g1,TR1103_c0_g1,TR2079_c0_g2,TR792_c0_g1,TR8357_c0_g1,TR3246_c0_g1,TR5095_c0_g1,TR591_c0_g1,TR421_c0_g1,TR4270_c0_g1,TR10975_c0_g1	0.757675965187527	0.944912643625051	0.142857142857143
GO:0016020	membrane	CC	78	497	270	1627	TR1136_c0_g1,TR1758_c0_g1,TR14438_c0_g1,TR10464_c0_g1,TR547_c0_g3,TR6239_c0_g1,TR18062_c0_g1,TR591_c0_g1,TR108_c0_g1,TR1227_c1_g1,TR12812_c0_g1,TR2129_c0_g1,TR2607_c0_g1,TR3471_c0_g1,TR4697_c0_g1,TR7064_c0_g1,TR849_c0_g1,TR1000_c0_g1,TR1024_c0_g1,TR11032_c0_g1,TR13183_c0_g1,TR13205_c0_g1,TR1418_c0_g1,TR16413_c0_g1,TR19156_c0_g1,TR2562_c0_g1,TR2806_c0_g1,TR396_c0_g1,TR4023_c0_g1,TR4196_c0_g1,TR470…	0.763289526652907	0.944912643625051	0.156941649899396
GO:0044283	small molecule biosynthetic process	BP	6	44	270	1627	TR3800_c0_g1,TR1227_c1_g1,TR1832_c0_g1,TR10328_c0_g1,TR5183_c0_g1,TR591_c0_g1	0.764052618746031	0.944912643625051	0.136363636363636
GO:0071705	nitrogen compound transport	BP	6	44	270	1627	TR8106_c0_g1,TR14438_c0_g1,TR3971_c0_g1,TR18062_c0_g1,TR1136_c0_g1,TR3407_c0_g1	0.764052618746031	0.944912643625051	0.136363636363636
GO:0006352	DNA-templated transcription, initiation	BP	1	8	270	1627	TR10320_c0_g1	0.766629359067402	0.944912643625051	0.125
GO:0006644	phospholipid metabolic process	BP	1	8	270	1627	TR3622_c0_g1	0.766629359067402	0.944912643625051	0.125
GO:0009063	cellular amino acid catabolic process	BP	1	8	270	1627	TR6217_c0_g1	0.766629359067402	0.944912643625051	0.125
GO:0009108	coenzyme biosynthetic process	BP	1	8	270	1627	TR5183_c0_g1	0.766629359067402	0.944912643625051	0.125
GO:0044093	positive regulation of molecular function	BP	1	8	270	1627	TR4270_c0_g1	0.766629359067402	0.944912643625051	0.125
GO:0044272	sulfur compound biosynthetic process	BP	1	8	270	1627	TR591_c0_g1	0.766629359067402	0.944912643625051	0.125
GO:0016620	oxidoreductase activity, acting on the aldehyde or oxo group of donors, NAD or NADP as acceptor	MF	1	8	270	1627	TR4424_c0_g1	0.766629359067402	0.944912643625051	0.125
GO:0016701	oxidoreductase activity, acting on single donors with incorporation of molecular oxygen	MF	1	8	270	1627	TR18385_c0_g1	0.766629359067402	0.944912643625051	0.125
GO:0016835	carbon-oxygen lyase activity	MF	1	8	270	1627	TR3332_c0_g1	0.766629359067402	0.944912643625051	0.125
GO:0051082	unfolded protein binding	MF	1	8	270	1627	TR8106_c0_g1	0.766629359067402	0.944912643625051	0.125
GO:0071949	FAD binding	MF	1	8	270	1627	TR2607_c0_g1	0.766629359067402	0.944912643625051	0.125
GO:0005635	nuclear envelope	CC	1	8	270	1627	TR4839_c0_g1	0.766629359067402	0.944912643625051	0.125
GO:0009889	regulation of biosynthetic process	BP	10	71	270	1627	TR4856_c1_g1,TR1103_c0_g1,TR2079_c0_g2,TR792_c0_g1,TR8357_c0_g1,TR3246_c0_g1,TR5095_c0_g1,TR591_c0_g1,TR10975_c0_g1,TR421_c0_g1	0.767046734236806	0.944912643625051	0.140845070422535
GO:0031326	regulation of cellular biosynthetic process	BP	10	71	270	1627	TR4856_c1_g1,TR1103_c0_g1,TR2079_c0_g2,TR792_c0_g1,TR8357_c0_g1,TR3246_c0_g1,TR5095_c0_g1,TR591_c0_g1,TR10975_c0_g1,TR421_c0_g1	0.767046734236806	0.944912643625051	0.140845070422535
GO:0006468	protein phosphorylation	BP	2	16	270	1627	TR3246_c0_g1,TR4270_c0_g1	0.772030921924287	0.946480216782179	0.125
GO:0020037	heme binding	MF	2	16	270	1627	TR547_c0_g3,TR2718_c0_g1	0.772030921924287	0.946480216782179	0.125
GO:0046906	tetrapyrrole binding	MF	2	16	270	1627	TR547_c0_g3,TR2718_c0_g1	0.772030921924287	0.946480216782179	0.125
GO:0140101	catalytic activity, acting on a tRNA	MF	2	16	270	1627	TR14307_c0_g1,TR1386_c0_g1	0.772030921924287	0.946480216782179	0.125
GO:0003676	nucleic acid binding	MF	14	98	270	1627	TR1163_c0_g2,TR1738_c0_g1,TR1817_c0_g1,TR4768_c0_g1,TR5095_c0_g1,TR4317_c0_g1,TR709_c0_g1,TR2699_c0_g1,TR10975_c0_g1,TR2861_c0_g1,TR1903_c0_g4,TR264_c1_g3,TR264_c1_g4,TR48_c0_g2	0.777156502227435	0.950928626396378	0.142857142857143
GO:0050896	response to stimulus	BP	9	65	270	1627	TR3246_c0_g1,TR24_c2_g1,TR4856_c1_g1,TR591_c0_g1,TR11397_c0_g1,TR1817_c0_g1,TR4839_c0_g1,TR16620_c0_g1,TR16623_c0_g1	0.777523994524097	0.950928626396378	0.138461538461538
GO:0043412	macromolecule modification	BP	5	38	270	1627	TR3246_c0_g1,TR14446_c0_g1,TR10975_c0_g1,TR12937_c0_g1,TR4270_c0_g1	0.781961307505289	0.953896627378472	0.131578947368421
GO:0006464	cellular protein modification process	BP	4	31	270	1627	TR3246_c0_g1,TR14446_c0_g1,TR12937_c0_g1,TR4270_c0_g1	0.782756350113511	0.953896627378472	0.129032258064516
GO:0036211	protein modification process	BP	4	31	270	1627	TR3246_c0_g1,TR14446_c0_g1,TR12937_c0_g1,TR4270_c0_g1	0.782756350113511	0.953896627378472	0.129032258064516
GO:0016740	transferase activity	MF	19	131	270	1627	TR10328_c0_g1,TR4305_c0_g1,TR38_c0_g2,TR3800_c0_g1,TR3246_c0_g1,TR6136_c0_g1,TR5212_c0_g1,TR14912_c0_g1,TR3940_c0_g1,TR1343_c0_g1,TR11224_c0_g1,TR1568_c0_g1,TR780_c0_g1,TR4856_c1_g1,TR1419_c0_g1,TR283_c0_g1,TR2236_c0_g1,TR2490_c0_g1,TR2928_c0_g1	0.783700066649049	0.953907002365191	0.145038167938931
GO:0031981	nuclear lumen	CC	3	24	270	1627	TR10975_c0_g1,TR1202_c0_g1,TR2699_c0_g1	0.787605757522681	0.957518322613986	0.125
GO:0050794	regulation of cellular process	BP	14	99	270	1627	TR3246_c0_g1,TR4856_c1_g1,TR24_c2_g1,TR1103_c0_g1,TR2079_c0_g2,TR792_c0_g1,TR8357_c0_g1,TR5095_c0_g1,TR591_c0_g1,TR11397_c0_g1,TR421_c0_g1,TR5275_c0_g1,TR4270_c0_g1,TR10975_c0_g1	0.790255053988844	0.959595422700738	0.141414141414141
GO:0006457	protein folding	BP	2	17	270	1627	TR4839_c0_g1,TR8106_c0_g1	0.801074262277337	0.96438903737713	0.117647058823529
GO:0006811	ion transport	BP	7	53	270	1627	TR2523_c0_g1,TR3407_c0_g1,TR4697_c0_g1,TR547_c0_g3,TR7064_c0_g1,TR10464_c0_g1,TR1758_c0_g1	0.802796038862757	0.96438903737713	0.132075471698113
GO:0003677	DNA binding	MF	7	53	270	1627	TR10975_c0_g1,TR2861_c0_g1,TR1163_c0_g2,TR1738_c0_g1,TR1817_c0_g1,TR4768_c0_g1,TR5095_c0_g1	0.802796038862757	0.96438903737713	0.132075471698113
GO:0006950	response to stress	BP	4	32	270	1627	TR4856_c1_g1,TR3246_c0_g1,TR1817_c0_g1,TR4839_c0_g1	0.804027206405263	0.96438903737713	0.125
GO:0016310	phosphorylation	BP	4	32	270	1627	TR3246_c0_g1,TR547_c0_g3,TR6239_c0_g1,TR4270_c0_g1	0.804027206405263	0.96438903737713	0.125
GO:0006281	DNA repair	BP	1	9	270	1627	TR1817_c0_g1	0.805548490044426	0.96438903737713	0.111111111111111
GO:0006790	sulfur compound metabolic process	BP	1	9	270	1627	TR591_c0_g1	0.805548490044426	0.96438903737713	0.111111111111111
GO:0016071	mRNA metabolic process	BP	1	9	270	1627	TR2699_c0_g1	0.805548490044426	0.96438903737713	0.111111111111111
GO:0090501	RNA phosphodiester bond hydrolysis	BP	1	9	270	1627	TR1903_c0_g4	0.805548490044426	0.96438903737713	0.111111111111111
GO:0015297	antiporter activity	MF	1	9	270	1627	TR4697_c0_g1	0.805548490044426	0.96438903737713	0.111111111111111
GO:0050661	NADP binding	MF	1	9	270	1627	TR5183_c0_g1	0.805548490044426	0.96438903737713	0.111111111111111
GO:0044451	nucleoplasm part	CC	1	9	270	1627	TR2699_c0_g1	0.805548490044426	0.96438903737713	0.111111111111111
GO:0009987	cellular process	BP	75	485	270	1627	TR14507_c0_g1,TR3636_c0_g1,TR420_c0_g1,TR420_c0_g2,TR4270_c0_g1,TR3246_c0_g1,TR14446_c0_g1,TR10975_c0_g1,TR1243_c0_g1,TR4856_c1_g1,TR8106_c0_g1,TR4839_c0_g1,TR24_c2_g1,TR3335_c0_g1,TR38_c0_g2,TR283_c0_g1,TR547_c0_g3,TR1817_c0_g1,TR11224_c0_g1,TR2890_c0_g1,TR1202_c0_g1,TR6610_c0_g1,TR8315_c0_g1,TR484_c0_g1,TR1103_c0_g1,TR2079_c0_g2,TR792_c0_g1,TR8357_c0_g1,TR5095_c0_g1,TR10320_c0_g1,TR2699_c0_g1,T…	0.807954238604688	0.964501481177424	0.154639175257732
GO:0019219	regulation of nucleobase-containing compound metabolic process	BP	9	67	270	1627	TR4856_c1_g1,TR1103_c0_g1,TR2079_c0_g2,TR792_c0_g1,TR8357_c0_g1,TR3246_c0_g1,TR5095_c0_g1,TR10975_c0_g1,TR421_c0_g1	0.808016006819665	0.964501481177424	0.134328358208955
GO:0031974	membrane-enclosed lumen	CC	3	25	270	1627	TR10975_c0_g1,TR1202_c0_g1,TR2699_c0_g1	0.810961237685147	0.964501481177424	0.12
GO:0043233	organelle lumen	CC	3	25	270	1627	TR10975_c0_g1,TR1202_c0_g1,TR2699_c0_g1	0.810961237685147	0.964501481177424	0.12
GO:0070013	intracellular organelle lumen	CC	3	25	270	1627	TR10975_c0_g1,TR1202_c0_g1,TR2699_c0_g1	0.810961237685147	0.964501481177424	0.12
GO:0080090	regulation of primary metabolic process	BP	10	74	270	1627	TR4856_c1_g1,TR1103_c0_g1,TR2079_c0_g2,TR792_c0_g1,TR8357_c0_g1,TR3246_c0_g1,TR5095_c0_g1,TR421_c0_g1,TR4270_c0_g1,TR10975_c0_g1	0.811315951813951	0.964501481177424	0.135135135135135
GO:0019222	regulation of metabolic process	BP	11	81	270	1627	TR4856_c1_g1,TR1103_c0_g1,TR2079_c0_g2,TR792_c0_g1,TR8357_c0_g1,TR3246_c0_g1,TR5095_c0_g1,TR591_c0_g1,TR421_c0_g1,TR4270_c0_g1,TR10975_c0_g1	0.814871807514908	0.966838330461253	0.135802469135802
GO:0003674	molecular_function	MF	182	1131	270	1627	TR8106_c0_g1,TR1008_c1_g1,TR1163_c0_g2,TR14307_c0_g1,TR14507_c0_g1,TR3076_c0_g1,TR3242_c0_g1,TR3636_c0_g1,TR4032_c1_g1,TR5498_c0_g1,TR1255_c0_g1,TR24_c2_g1,TR2955_c0_g1,TR1758_c0_g1,TR420_c0_g1,TR420_c0_g2,TR4270_c0_g1,TR591_c0_g1,TR4196_c0_g1,TR5095_c0_g1,TR4793_c0_g1,TR1903_c0_g4,TR264_c1_g3,TR264_c1_g4,TR48_c0_g2,TR1738_c0_g1,TR1817_c0_g1,TR4768_c0_g1,TR4317_c0_g1,TR709_c0_g1,TR2699_c0_g1,TR19…	0.815177415879096	0.966838330461253	0.160919540229885
GO:0043603	cellular amide metabolic process	BP	8	61	270	1627	TR1973_c0_g1,TR4317_c0_g1,TR709_c0_g1,TR365_c0_g2,TR14307_c0_g1,TR1386_c0_g1,TR5183_c0_g1,TR591_c0_g1	0.819973411395892	0.97139707273381	0.131147540983607
GO:0005575	cellular_component	CC	127	804	270	1627	TR1032_c0_g1,TR10921_c0_g1,TR1108_c0_g1,TR1497_c2_g1,TR1913_c0_g1,TR2236_c0_g1,TR2523_c0_g1,TR2548_c0_g1,TR2555_c0_g1,TR2561_c0_g1,TR2895_c0_g1,TR3145_c0_g1,TR3200_c0_g1,TR3260_c0_g1,TR3267_c0_g1,TR332_c0_g1,TR3344_c0_g1,TR3407_c0_g1,TR3565_c0_g1,TR4039_c0_g1,TR405_c0_g1,TR4348_c0_g1,TR4366_c0_g1,TR4549_c0_g1,TR4596_c0_g1,TR4671_c0_g1,TR4688_c0_g1,TR5498_c0_g1,TR7112_c0_g1,TR7166_c0_g1,TR780_c0_g…	0.82192852864596	0.972583641785242	0.157960199004975
GO:0006412	translation	BP	6	48	270	1627	TR365_c0_g2,TR14307_c0_g1,TR1386_c0_g1,TR1973_c0_g1,TR4317_c0_g1,TR709_c0_g1	0.834044122944636	0.974637488933283	0.125
GO:0010556	regulation of macromolecule biosynthetic process	BP	9	69	270	1627	TR4856_c1_g1,TR1103_c0_g1,TR2079_c0_g2,TR792_c0_g1,TR8357_c0_g1,TR3246_c0_g1,TR5095_c0_g1,TR10975_c0_g1,TR421_c0_g1	0.835283227669679	0.974637488933283	0.130434782608696
GO:2000112	regulation of cellular macromolecule biosynthetic process	BP	9	69	270	1627	TR4856_c1_g1,TR1103_c0_g1,TR2079_c0_g2,TR792_c0_g1,TR8357_c0_g1,TR3246_c0_g1,TR5095_c0_g1,TR10975_c0_g1,TR421_c0_g1	0.835283227669679	0.974637488933283	0.130434782608696
GO:0006732	coenzyme metabolic process	BP	1	10	270	1627	TR5183_c0_g1	0.837997135092637	0.974637488933283	0.1
GO:0009124	nucleoside monophosphate biosynthetic process	BP	1	10	270	1627	TR10464_c0_g1	0.837997135092637	0.974637488933283	0.1
GO:0009127	purine nucleoside monophosphate biosynthetic process	BP	1	10	270	1627	TR10464_c0_g1	0.837997135092637	0.974637488933283	0.1
GO:0009156	ribonucleoside monophosphate biosynthetic process	BP	1	10	270	1627	TR10464_c0_g1	0.837997135092637	0.974637488933283	0.1
GO:0009168	purine ribonucleoside monophosphate biosynthetic process	BP	1	10	270	1627	TR10464_c0_g1	0.837997135092637	0.974637488933283	0.1
GO:0048523	negative regulation of cellular process	BP	1	10	270	1627	TR4856_c1_g1	0.837997135092637	0.974637488933283	0.1
GO:0050790	regulation of catalytic activity	BP	1	10	270	1627	TR4270_c0_g1	0.837997135092637	0.974637488933283	0.1
GO:0071310	cellular response to organic substance	BP	1	10	270	1627	TR4839_c0_g1	0.837997135092637	0.974637488933283	0.1
GO:0004519	endonuclease activity	MF	1	10	270	1627	TR1903_c0_g4	0.837997135092637	0.974637488933283	0.1
GO:0051536	iron-sulfur cluster binding	MF	1	10	270	1627	TR2607_c0_g1	0.837997135092637	0.974637488933283	0.1
GO:0051540	metal cluster binding	MF	1	10	270	1627	TR2607_c0_g1	0.837997135092637	0.974637488933283	0.1
GO:0044459	plasma membrane part	CC	1	10	270	1627	TR591_c0_g1	0.837997135092637	0.974637488933283	0.1
GO:0050789	regulation of biological process	BP	14	104	270	1627	TR3246_c0_g1,TR4856_c1_g1,TR24_c2_g1,TR1103_c0_g1,TR2079_c0_g2,TR792_c0_g1,TR8357_c0_g1,TR5095_c0_g1,TR591_c0_g1,TR11397_c0_g1,TR421_c0_g1,TR5275_c0_g1,TR4270_c0_g1,TR10975_c0_g1	0.847643700574311	0.984641557269538	0.134615384615385
GO:0043043	peptide biosynthetic process	BP	6	49	270	1627	TR1973_c0_g1,TR4317_c0_g1,TR709_c0_g1,TR365_c0_g2,TR14307_c0_g1,TR1386_c0_g1	0.848680315655576	0.984641557269538	0.122448979591837
GO:0019439	aromatic compound catabolic process	BP	2	19	270	1627	TR6217_c0_g1,TR2607_c0_g1	0.849494676859994	0.984641557269538	0.105263157894737
GO:0044428	nuclear part	CC	4	35	270	1627	TR4839_c0_g1,TR2699_c0_g1,TR10975_c0_g1,TR1202_c0_g1	0.857881674562443	0.989180112502238	0.114285714285714
GO:0060255	regulation of macromolecule metabolic process	BP	10	78	270	1627	TR4856_c1_g1,TR1103_c0_g1,TR2079_c0_g2,TR792_c0_g1,TR8357_c0_g1,TR3246_c0_g1,TR5095_c0_g1,TR4270_c0_g1,TR10975_c0_g1,TR421_c0_g1	0.860208439622347	0.989180112502238	0.128205128205128
GO:0046914	transition metal ion binding	MF	11	85	270	1627	TR1227_c1_g1,TR2607_c0_g1,TR547_c0_g3,TR2718_c0_g1,TR16469_c0_g1,TR2262_c0_g1,TR971_c0_g1,TR18385_c0_g1,TR3335_c0_g1,TR5095_c0_g1,TR4607_c0_g1	0.861436389006538	0.989180112502238	0.129411764705882
GO:0006518	peptide metabolic process	BP	6	50	270	1627	TR1973_c0_g1,TR4317_c0_g1,TR709_c0_g1,TR365_c0_g2,TR14307_c0_g1,TR1386_c0_g1	0.862252816863759	0.989180112502238	0.12
GO:0000272	polysaccharide catabolic process	BP	1	11	270	1627	TR16714_c0_g1	0.865047706227447	0.989180112502238	0.0909090909090909
GO:0006631	fatty acid metabolic process	BP	1	11	270	1627	TR1227_c1_g1	0.865047706227447	0.989180112502238	0.0909090909090909
GO:0009152	purine ribonucleotide biosynthetic process	BP	1	11	270	1627	TR10464_c0_g1	0.865047706227447	0.989180112502238	0.0909090909090909
GO:0009260	ribonucleotide biosynthetic process	BP	1	11	270	1627	TR10464_c0_g1	0.865047706227447	0.989180112502238	0.0909090909090909
GO:0044262	cellular carbohydrate metabolic process	BP	1	11	270	1627	TR38_c0_g2	0.865047706227447	0.989180112502238	0.0909090909090909
GO:0046390	ribose phosphate biosynthetic process	BP	1	11	270	1627	TR10464_c0_g1	0.865047706227447	0.989180112502238	0.0909090909090909
GO:0065009	regulation of molecular function	BP	1	11	270	1627	TR4270_c0_g1	0.865047706227447	0.989180112502238	0.0909090909090909
GO:0004518	nuclease activity	MF	1	11	270	1627	TR1903_c0_g4	0.865047706227447	0.989180112502238	0.0909090909090909
GO:0006355	regulation of transcription, DNA-templated	BP	8	65	270	1627	TR3246_c0_g1,TR5095_c0_g1,TR10975_c0_g1,TR4856_c1_g1,TR1103_c0_g1,TR2079_c0_g2,TR792_c0_g1,TR8357_c0_g1	0.870860343852783	0.991809800346419	0.123076923076923
GO:1903506	regulation of nucleic acid-templated transcription	BP	8	65	270	1627	TR4856_c1_g1,TR1103_c0_g1,TR2079_c0_g2,TR792_c0_g1,TR8357_c0_g1,TR3246_c0_g1,TR5095_c0_g1,TR10975_c0_g1	0.870860343852783	0.991809800346419	0.123076923076923
GO:2001141	regulation of RNA biosynthetic process	BP	8	65	270	1627	TR4856_c1_g1,TR1103_c0_g1,TR2079_c0_g2,TR792_c0_g1,TR8357_c0_g1,TR3246_c0_g1,TR5095_c0_g1,TR10975_c0_g1	0.870860343852783	0.991809800346419	0.123076923076923
GO:0034645	cellular macromolecule biosynthetic process	BP	24	173	270	1627	TR14507_c0_g1,TR3636_c0_g1,TR1243_c0_g1,TR1817_c0_g1,TR6610_c0_g1,TR8315_c0_g1,TR484_c0_g1,TR4856_c1_g1,TR1103_c0_g1,TR2079_c0_g2,TR792_c0_g1,TR8357_c0_g1,TR3246_c0_g1,TR5095_c0_g1,TR10320_c0_g1,TR1973_c0_g1,TR4317_c0_g1,TR709_c0_g1,TR365_c0_g2,TR14307_c0_g1,TR1386_c0_g1,TR10975_c0_g1,TR421_c0_g1,TR2890_c0_g1	0.871236844225874	0.991809800346419	0.138728323699422
GO:0071944	cell periphery	CC	4	36	270	1627	TR1136_c0_g1,TR635_c0_g1,TR591_c0_g1,TR4270_c0_g1	0.872799124448118	0.992480609740335	0.111111111111111
GO:0044260	cellular macromolecule metabolic process	BP	34	239	270	1627	TR14507_c0_g1,TR3636_c0_g1,TR3246_c0_g1,TR14446_c0_g1,TR10975_c0_g1,TR1243_c0_g1,TR1817_c0_g1,TR6610_c0_g1,TR8315_c0_g1,TR484_c0_g1,TR4856_c1_g1,TR1103_c0_g1,TR2079_c0_g2,TR792_c0_g1,TR8357_c0_g1,TR5095_c0_g1,TR10320_c0_g1,TR1973_c0_g1,TR4317_c0_g1,TR709_c0_g1,TR365_c0_g2,TR14307_c0_g1,TR1386_c0_g1,TR1589_c0_g1,TR12937_c0_g1,TR1163_c0_g2,TR4378_c0_g1,TR2890_c0_g1,TR1758_c0_g1,TR5275_c0_g1,TR4270_…	0.878159807242583	0.99662522362562	0.142259414225941
GO:0051252	regulation of RNA metabolic process	BP	8	66	270	1627	TR4856_c1_g1,TR1103_c0_g1,TR2079_c0_g2,TR792_c0_g1,TR8357_c0_g1,TR3246_c0_g1,TR5095_c0_g1,TR10975_c0_g1	0.881574923227351	0.99662522362562	0.121212121212121
GO:0016874	ligase activity	MF	6	52	270	1627	TR14307_c0_g1,TR1386_c0_g1,TR16143_c0_g1,TR4889_c0_g1,TR5454_c0_g1,TR8503_c0_g2	0.886397641983381	0.99662522362562	0.115384615384615
GO:0044255	cellular lipid metabolic process	BP	2	21	270	1627	TR1227_c1_g1,TR3622_c0_g1	0.886973157302996	0.99662522362562	0.0952380952380952
GO:0010033	response to organic substance	BP	1	12	270	1627	TR4839_c0_g1	0.887595428578059	0.99662522362562	0.0833333333333333
GO:0016054	organic acid catabolic process	BP	1	12	270	1627	TR6217_c0_g1	0.887595428578059	0.99662522362562	0.0833333333333333
GO:0046395	carboxylic acid catabolic process	BP	1	12	270	1627	TR6217_c0_g1	0.887595428578059	0.99662522362562	0.0833333333333333
GO:0016903	oxidoreductase activity, acting on the aldehyde or oxo group of donors	MF	1	12	270	1627	TR4424_c0_g1	0.887595428578059	0.99662522362562	0.0833333333333333
GO:0005654	nucleoplasm	CC	1	12	270	1627	TR2699_c0_g1	0.887595428578059	0.99662522362562	0.0833333333333333
GO:0009059	macromolecule biosynthetic process	BP	24	176	270	1627	TR14507_c0_g1,TR3636_c0_g1,TR1243_c0_g1,TR1817_c0_g1,TR6610_c0_g1,TR8315_c0_g1,TR484_c0_g1,TR4856_c1_g1,TR1103_c0_g1,TR2079_c0_g2,TR792_c0_g1,TR8357_c0_g1,TR3246_c0_g1,TR5095_c0_g1,TR10320_c0_g1,TR1973_c0_g1,TR4317_c0_g1,TR709_c0_g1,TR365_c0_g2,TR14307_c0_g1,TR1386_c0_g1,TR2890_c0_g1,TR10975_c0_g1,TR421_c0_g1	0.891657039416793	0.99662522362562	0.136363636363636
GO:0006793	phosphorus metabolic process	BP	7	60	270	1627	TR3246_c0_g1,TR547_c0_g3,TR3622_c0_g1,TR10464_c0_g1,TR6239_c0_g1,TR4270_c0_g1,TR1758_c0_g1	0.893682001828193	0.99662522362562	0.116666666666667
GO:0006796	phosphate-containing compound metabolic process	BP	7	60	270	1627	TR3246_c0_g1,TR547_c0_g3,TR3622_c0_g1,TR10464_c0_g1,TR6239_c0_g1,TR4270_c0_g1,TR1758_c0_g1	0.893682001828193	0.99662522362562	0.116666666666667
GO:0071702	organic substance transport	BP	6	53	270	1627	TR8106_c0_g1,TR14438_c0_g1,TR3971_c0_g1,TR108_c0_g1,TR18062_c0_g1,TR1136_c0_g1	0.89707018706261	0.99662522362562	0.113207547169811
GO:0004553	hydrolase activity, hydrolyzing O-glycosyl compounds	MF	3	30	270	1627	TR1390_c0_g1,TR16714_c0_g1,TR5848_c0_g1	0.897598929063108	0.99662522362562	0.1
GO:0017076	purine nucleotide binding	MF	12	96	270	1627	TR1386_c0_g1,TR1758_c0_g1,TR1817_c0_g1,TR4839_c0_g1,TR8106_c0_g1,TR1430_c0_g1,TR11397_c0_g1,TR420_c0_g1,TR420_c0_g2,TR4270_c0_g1,TR591_c0_g1,TR24_c2_g1	0.898467486282334	0.99662522362562	0.125
GO:0065007	biological regulation	BP	15	117	270	1627	TR3246_c0_g1,TR10975_c0_g1,TR4856_c1_g1,TR24_c2_g1,TR1103_c0_g1,TR2079_c0_g2,TR792_c0_g1,TR8357_c0_g1,TR5095_c0_g1,TR1758_c0_g1,TR591_c0_g1,TR11397_c0_g1,TR421_c0_g1,TR5275_c0_g1,TR4270_c0_g1	0.900822132966062	0.99662522362562	0.128205128205128
GO:0016705	oxidoreductase activity, acting on paired donors, with incorporation or reduction of molecular oxygen	MF	2	22	270	1627	TR2607_c0_g1,TR2718_c0_g1	0.90229246984304	0.99662522362562	0.0909090909090909
GO:0044425	membrane part	CC	35	250	270	1627	TR547_c0_g3,TR6239_c0_g1,TR10464_c0_g1,TR108_c0_g1,TR1227_c1_g1,TR12812_c0_g1,TR2129_c0_g1,TR2607_c0_g1,TR3471_c0_g1,TR4697_c0_g1,TR7064_c0_g1,TR849_c0_g1,TR1000_c0_g1,TR1024_c0_g1,TR11032_c0_g1,TR13183_c0_g1,TR13205_c0_g1,TR1418_c0_g1,TR16413_c0_g1,TR19156_c0_g1,TR2562_c0_g1,TR2806_c0_g1,TR396_c0_g1,TR4023_c0_g1,TR4196_c0_g1,TR4705_c0_g1,TR561_c0_g1,TR6684_c0_g1,TR7354_c0_g1,TR912_c0_g1,TR3971_c…	0.90353268801346	0.99662522362562	0.14
GO:0006164	purine nucleotide biosynthetic process	BP	1	13	270	1627	TR10464_c0_g1	0.906387524109901	0.99662522362562	0.0769230769230769
GO:0044282	small molecule catabolic process	BP	1	13	270	1627	TR6217_c0_g1	0.906387524109901	0.99662522362562	0.0769230769230769
GO:0048519	negative regulation of biological process	BP	1	13	270	1627	TR4856_c1_g1	0.906387524109901	0.99662522362562	0.0769230769230769
GO:0051188	cofactor biosynthetic process	BP	1	13	270	1627	TR5183_c0_g1	0.906387524109901	0.99662522362562	0.0769230769230769
GO:0015291	secondary active transmembrane transporter activity	MF	1	13	270	1627	TR4697_c0_g1	0.906387524109901	0.99662522362562	0.0769230769230769
GO:0042626	ATPase activity, coupled to transmembrane movement of substances	MF	1	13	270	1627	TR1758_c0_g1	0.906387524109901	0.99662522362562	0.0769230769230769
GO:0043492	ATPase activity, coupled to movement of substances	MF	1	13	270	1627	TR1758_c0_g1	0.906387524109901	0.99662522362562	0.0769230769230769
GO:0034660	ncRNA metabolic process	BP	3	31	270	1627	TR10975_c0_g1,TR14307_c0_g1,TR1386_c0_g1	0.909903491093422	0.99662522362562	0.0967741935483871
GO:0044248	cellular catabolic process	BP	5	47	270	1627	TR1589_c0_g1,TR12937_c0_g1,TR4378_c0_g1,TR2607_c0_g1,TR6217_c0_g1	0.912169404115601	0.99662522362562	0.106382978723404
GO:1901605	alpha-amino acid metabolic process	BP	2	23	270	1627	TR3800_c0_g1,TR6217_c0_g1	0.915661473226896	0.99662522362562	0.0869565217391304
GO:0006725	cellular aromatic compound metabolic process	BP	33	240	270	1627	TR14507_c0_g1,TR3636_c0_g1,TR10975_c0_g1,TR1243_c0_g1,TR547_c0_g3,TR1817_c0_g1,TR6610_c0_g1,TR8315_c0_g1,TR484_c0_g1,TR4856_c1_g1,TR1103_c0_g1,TR2079_c0_g2,TR792_c0_g1,TR8357_c0_g1,TR3246_c0_g1,TR5095_c0_g1,TR10320_c0_g1,TR2699_c0_g1,TR14307_c0_g1,TR1386_c0_g1,TR1163_c0_g2,TR10328_c0_g1,TR3800_c0_g1,TR18385_c0_g1,TR591_c0_g1,TR10464_c0_g1,TR421_c0_g1,TR2607_c0_g1,TR6217_c0_g1,TR6239_c0_g1,TR1758_…	0.9180436596264	0.99662522362562	0.1375
GO:0006351	transcription, DNA-templated	BP	13	106	270	1627	TR1243_c0_g1,TR4856_c1_g1,TR1103_c0_g1,TR2079_c0_g2,TR792_c0_g1,TR8357_c0_g1,TR3246_c0_g1,TR5095_c0_g1,TR10320_c0_g1,TR10975_c0_g1,TR6610_c0_g1,TR8315_c0_g1,TR484_c0_g1	0.919696595109001	0.99662522362562	0.122641509433962
GO:1901566	organonitrogen compound biosynthetic process	BP	12	99	270	1627	TR1973_c0_g1,TR4317_c0_g1,TR709_c0_g1,TR365_c0_g2,TR14307_c0_g1,TR1386_c0_g1,TR3800_c0_g1,TR1832_c0_g1,TR10328_c0_g1,TR5183_c0_g1,TR10464_c0_g1,TR591_c0_g1	0.919822027585048	0.99662522362562	0.121212121212121
GO:0140098	catalytic activity, acting on RNA	MF	3	32	270	1627	TR1903_c0_g4,TR14307_c0_g1,TR1386_c0_g1	0.920856210199094	0.99662522362562	0.09375
GO:0008610	lipid biosynthetic process	BP	1	14	270	1627	TR1227_c1_g1	0.922047603719769	0.99662522362562	0.0714285714285714
GO:0090305	nucleic acid phosphodiester bond hydrolysis	BP	1	14	270	1627	TR1903_c0_g4	0.922047603719769	0.99662522362562	0.0714285714285714
GO:1901607	alpha-amino acid biosynthetic process	BP	1	14	270	1627	TR3800_c0_g1	0.922047603719769	0.99662522362562	0.0714285714285714
GO:0004672	protein kinase activity	MF	1	14	270	1627	TR3246_c0_g1	0.922047603719769	0.99662522362562	0.0714285714285714
GO:0015399	primary active transmembrane transporter activity	MF	1	14	270	1627	TR1758_c0_g1	0.922047603719769	0.99662522362562	0.0714285714285714
GO:0015405	P-P-bond-hydrolysis-driven transmembrane transporter activity	MF	1	14	270	1627	TR1758_c0_g1	0.922047603719769	0.99662522362562	0.0714285714285714
GO:0016747	transferase activity, transferring acyl groups other than amino-acyl groups	MF	1	14	270	1627	TR6136_c0_g1	0.922047603719769	0.99662522362562	0.0714285714285714
GO:0010468	regulation of gene expression	BP	8	71	270	1627	TR4856_c1_g1,TR1103_c0_g1,TR2079_c0_g2,TR792_c0_g1,TR8357_c0_g1,TR3246_c0_g1,TR5095_c0_g1,TR10975_c0_g1	0.924719844901636	0.99662522362562	0.112676056338028
GO:0046872	metal ion binding	MF	21	162	270	1627	TR4793_c0_g1,TR1227_c1_g1,TR2607_c0_g1,TR547_c0_g3,TR2718_c0_g1,TR16469_c0_g1,TR2262_c0_g1,TR971_c0_g1,TR18385_c0_g1,TR3335_c0_g1,TR5095_c0_g1,TR4607_c0_g1,TR1477_c0_g1,TR3241_c0_g1,TR370_c0_g1,TR4231_c0_g1,TR9716_c0_g1,TR1103_c0_g1,TR1776_c0_g1,TR2079_c0_g2,TR4242_c0_g1	0.925692511135273	0.99662522362562	0.12962962962963
GO:0006396	RNA processing	BP	2	24	270	1627	TR2699_c0_g1,TR10975_c0_g1	0.927302901927279	0.99662522362562	0.0833333333333333
GO:0016788	hydrolase activity, acting on ester bonds	MF	2	24	270	1627	TR1903_c0_g4,TR18129_c0_g1	0.927302901927279	0.99662522362562	0.0833333333333333
GO:0097659	nucleic acid-templated transcription	BP	13	108	270	1627	TR1243_c0_g1,TR6610_c0_g1,TR8315_c0_g1,TR484_c0_g1,TR4856_c1_g1,TR1103_c0_g1,TR2079_c0_g2,TR792_c0_g1,TR8357_c0_g1,TR3246_c0_g1,TR5095_c0_g1,TR10320_c0_g1,TR10975_c0_g1	0.93143235075745	0.99662522362562	0.12037037037037
GO:0009165	nucleotide biosynthetic process	BP	1	15	270	1627	TR10464_c0_g1	0.935096051950185	0.99662522362562	0.0666666666666667
GO:0051186	cofactor metabolic process	BP	1	15	270	1627	TR5183_c0_g1	0.935096051950185	0.99662522362562	0.0666666666666667
GO:1901293	nucleoside phosphate biosynthetic process	BP	1	15	270	1627	TR10464_c0_g1	0.935096051950185	0.99662522362562	0.0666666666666667
GO:0032774	RNA biosynthetic process	BP	13	109	270	1627	TR1243_c0_g1,TR6610_c0_g1,TR8315_c0_g1,TR484_c0_g1,TR4856_c1_g1,TR1103_c0_g1,TR2079_c0_g2,TR792_c0_g1,TR8357_c0_g1,TR3246_c0_g1,TR5095_c0_g1,TR10320_c0_g1,TR10975_c0_g1	0.936735169416091	0.99662522362562	0.119266055045872
GO:0032555	purine ribonucleotide binding	MF	11	95	270	1627	TR1386_c0_g1,TR1758_c0_g1,TR1817_c0_g1,TR4839_c0_g1,TR8106_c0_g1,TR1430_c0_g1,TR11397_c0_g1,TR420_c0_g1,TR420_c0_g2,TR4270_c0_g1,TR591_c0_g1	0.93816097535701	0.99662522362562	0.115789473684211
GO:0035639	purine ribonucleoside triphosphate binding	MF	11	95	270	1627	TR1386_c0_g1,TR1758_c0_g1,TR1817_c0_g1,TR4839_c0_g1,TR8106_c0_g1,TR1430_c0_g1,TR11397_c0_g1,TR420_c0_g1,TR420_c0_g2,TR4270_c0_g1,TR591_c0_g1	0.93816097535701	0.99662522362562	0.115789473684211
GO:1901360	organic cyclic compound metabolic process	BP	33	245	270	1627	TR14507_c0_g1,TR3636_c0_g1,TR10975_c0_g1,TR1243_c0_g1,TR547_c0_g3,TR1817_c0_g1,TR6610_c0_g1,TR8315_c0_g1,TR484_c0_g1,TR4856_c1_g1,TR1103_c0_g1,TR2079_c0_g2,TR792_c0_g1,TR8357_c0_g1,TR3246_c0_g1,TR5095_c0_g1,TR10320_c0_g1,TR2699_c0_g1,TR14307_c0_g1,TR1386_c0_g1,TR1163_c0_g2,TR10328_c0_g1,TR3800_c0_g1,TR18385_c0_g1,TR591_c0_g1,TR10464_c0_g1,TR421_c0_g1,TR6217_c0_g1,TR6239_c0_g1,TR1758_c0_g1,TR2890_…	0.938411695021359	0.99662522362562	0.13469387755102
GO:0034641	cellular nitrogen compound metabolic process	BP	38	278	270	1627	TR14507_c0_g1,TR3636_c0_g1,TR10975_c0_g1,TR1243_c0_g1,TR547_c0_g3,TR1817_c0_g1,TR6610_c0_g1,TR8315_c0_g1,TR484_c0_g1,TR4856_c1_g1,TR1103_c0_g1,TR2079_c0_g2,TR792_c0_g1,TR8357_c0_g1,TR3246_c0_g1,TR5095_c0_g1,TR10320_c0_g1,TR2699_c0_g1,TR1973_c0_g1,TR4317_c0_g1,TR709_c0_g1,TR365_c0_g2,TR14307_c0_g1,TR1386_c0_g1,TR1163_c0_g2,TR3800_c0_g1,TR4768_c0_g1,TR5183_c0_g1,TR10464_c0_g1,TR421_c0_g1,TR6217_c0_…	0.939206674928974	0.99662522362562	0.136690647482014
GO:0044237	cellular metabolic process	BP	57	401	270	1627	TR14507_c0_g1,TR3636_c0_g1,TR3246_c0_g1,TR14446_c0_g1,TR10975_c0_g1,TR1243_c0_g1,TR3335_c0_g1,TR38_c0_g2,TR283_c0_g1,TR547_c0_g3,TR1817_c0_g1,TR6610_c0_g1,TR8315_c0_g1,TR484_c0_g1,TR4856_c1_g1,TR1103_c0_g1,TR2079_c0_g2,TR792_c0_g1,TR8357_c0_g1,TR5095_c0_g1,TR10320_c0_g1,TR2699_c0_g1,TR1973_c0_g1,TR4317_c0_g1,TR709_c0_g1,TR365_c0_g2,TR14307_c0_g1,TR1386_c0_g1,TR1589_c0_g1,TR12937_c0_g1,TR4305_c0_g…	0.941446089608754	0.99662522362562	0.14214463840399
GO:0043169	cation binding	MF	21	166	270	1627	TR4793_c0_g1,TR1477_c0_g1,TR3241_c0_g1,TR370_c0_g1,TR4231_c0_g1,TR9716_c0_g1,TR1103_c0_g1,TR1776_c0_g1,TR2079_c0_g2,TR4242_c0_g1,TR1227_c1_g1,TR2607_c0_g1,TR547_c0_g3,TR2718_c0_g1,TR16469_c0_g1,TR2262_c0_g1,TR971_c0_g1,TR18385_c0_g1,TR3335_c0_g1,TR5095_c0_g1,TR4607_c0_g1	0.943388404591097	0.99662522362562	0.126506024096386
GO:0009056	catabolic process	BP	6	59	270	1627	TR16714_c0_g1,TR1589_c0_g1,TR12937_c0_g1,TR4378_c0_g1,TR2607_c0_g1,TR6217_c0_g1	0.944724270038541	0.99662522362562	0.101694915254237
GO:0055085	transmembrane transport	BP	15	125	270	1627	TR8106_c0_g1,TR4697_c0_g1,TR547_c0_g3,TR7064_c0_g1,TR10464_c0_g1,TR1758_c0_g1,TR108_c0_g1,TR1108_c0_g1,TR3471_c0_g1,TR4039_c0_g1,TR1000_c0_g1,TR13183_c0_g1,TR19156_c0_g1,TR2562_c0_g1,TR396_c0_g1	0.945582105517372	0.99662522362562	0.12
GO:0019438	aromatic compound biosynthetic process	BP	17	139	270	1627	TR1243_c0_g1,TR6610_c0_g1,TR8315_c0_g1,TR484_c0_g1,TR4856_c1_g1,TR1103_c0_g1,TR2079_c0_g2,TR792_c0_g1,TR8357_c0_g1,TR3246_c0_g1,TR5095_c0_g1,TR10320_c0_g1,TR10328_c0_g1,TR3800_c0_g1,TR591_c0_g1,TR10464_c0_g1,TR10975_c0_g1	0.945621453753349	0.99662522362562	0.122302158273381
GO:0005976	polysaccharide metabolic process	BP	1	16	270	1627	TR16714_c0_g1	0.945967060618579	0.99662522362562	0.0625
GO:0016052	carbohydrate catabolic process	BP	1	16	270	1627	TR16714_c0_g1	0.945967060618579	0.99662522362562	0.0625
GO:0003700	DNA-binding transcription factor activity	MF	1	16	270	1627	TR5095_c0_g1	0.945967060618579	0.99662522362562	0.0625
GO:0019842	vitamin binding	MF	1	16	270	1627	TR4305_c0_g1	0.945967060618579	0.99662522362562	0.0625
GO:0006629	lipid metabolic process	BP	2	26	270	1627	TR1227_c1_g1,TR3622_c0_g1	0.946194818755104	0.99662522362562	0.0769230769230769
GO:0071704	organic substance metabolic process	BP	66	460	270	1627	TR14507_c0_g1,TR3636_c0_g1,TR3246_c0_g1,TR16714_c0_g1,TR14446_c0_g1,TR10975_c0_g1,TR1243_c0_g1,TR1390_c0_g1,TR17046_c0_g1,TR4640_c0_g1,TR5848_c0_g1,TR3335_c0_g1,TR38_c0_g2,TR283_c0_g1,TR547_c0_g3,TR1817_c0_g1,TR6610_c0_g1,TR8315_c0_g1,TR484_c0_g1,TR4856_c1_g1,TR1103_c0_g1,TR2079_c0_g2,TR792_c0_g1,TR8357_c0_g1,TR5095_c0_g1,TR10320_c0_g1,TR2699_c0_g1,TR1973_c0_g1,TR4317_c0_g1,TR709_c0_g1,TR365_c0_g…	0.946957644462156	0.99662522362562	0.143478260869565
GO:0032553	ribonucleotide binding	MF	11	98	270	1627	TR1386_c0_g1,TR1758_c0_g1,TR1817_c0_g1,TR4839_c0_g1,TR8106_c0_g1,TR1430_c0_g1,TR11397_c0_g1,TR420_c0_g1,TR420_c0_g2,TR4270_c0_g1,TR591_c0_g1	0.95247434161095	0.99662522362562	0.112244897959184
GO:0048037	cofactor binding	MF	11	98	270	1627	TR547_c0_g3,TR2718_c0_g1,TR4305_c0_g1,TR16469_c0_g1,TR2262_c0_g1,TR971_c0_g1,TR13_c0_g1,TR5183_c0_g1,TR3784_c0_g1,TR2607_c0_g1,TR1419_c0_g1	0.95247434161095	0.99662522362562	0.112244897959184
GO:0022804	active transmembrane transporter activity	MF	2	27	270	1627	TR1758_c0_g1,TR4697_c0_g1	0.9537933853358	0.99662522362562	0.0740740740740741
GO:0034470	ncRNA processing	BP	1	17	270	1627	TR10975_c0_g1	0.955022860514906	0.99662522362562	0.0588235294117647
GO:1901137	carbohydrate derivative biosynthetic process	BP	1	17	270	1627	TR10464_c0_g1	0.955022860514906	0.99662522362562	0.0588235294117647
GO:0046483	heterocycle metabolic process	BP	31	237	270	1627	TR14507_c0_g1,TR3636_c0_g1,TR10975_c0_g1,TR1243_c0_g1,TR547_c0_g3,TR1817_c0_g1,TR6610_c0_g1,TR8315_c0_g1,TR484_c0_g1,TR4856_c1_g1,TR1103_c0_g1,TR2079_c0_g2,TR792_c0_g1,TR8357_c0_g1,TR3246_c0_g1,TR5095_c0_g1,TR10320_c0_g1,TR2699_c0_g1,TR14307_c0_g1,TR1386_c0_g1,TR1163_c0_g2,TR3800_c0_g1,TR591_c0_g1,TR10464_c0_g1,TR421_c0_g1,TR6217_c0_g1,TR6239_c0_g1,TR1758_c0_g1,TR2890_c0_g1,TR1903_c0_g4,TR5270_c0…	0.955290329818346	0.99662522362562	0.130801687763713
GO:1901575	organic substance catabolic process	BP	5	53	270	1627	TR16714_c0_g1,TR1589_c0_g1,TR12937_c0_g1,TR4378_c0_g1,TR6217_c0_g1	0.955324495620066	0.99662522362562	0.0943396226415094
GO:0043170	macromolecule metabolic process	BP	41	305	270	1627	TR14507_c0_g1,TR3636_c0_g1,TR3246_c0_g1,TR16714_c0_g1,TR14446_c0_g1,TR10975_c0_g1,TR1243_c0_g1,TR1817_c0_g1,TR6610_c0_g1,TR8315_c0_g1,TR484_c0_g1,TR4856_c1_g1,TR1103_c0_g1,TR2079_c0_g2,TR792_c0_g1,TR8357_c0_g1,TR5095_c0_g1,TR10320_c0_g1,TR2699_c0_g1,TR1973_c0_g1,TR4317_c0_g1,TR709_c0_g1,TR365_c0_g2,TR14307_c0_g1,TR1386_c0_g1,TR2813_c0_g1,TR1091_c0_g1,TR4857_c0_g1,TR1589_c0_g1,TR12937_c0_g1,TR1163…	0.960255002673875	0.99662522362562	0.134426229508197
GO:0000166	nucleotide binding	MF	25	199	270	1627	TR1386_c0_g1,TR1758_c0_g1,TR1817_c0_g1,TR4839_c0_g1,TR8106_c0_g1,TR1430_c0_g1,TR11397_c0_g1,TR420_c0_g1,TR420_c0_g2,TR4270_c0_g1,TR591_c0_g1,TR24_c2_g1,TR13_c0_g1,TR5183_c0_g1,TR2607_c0_g1,TR1008_c1_g1,TR1163_c0_g2,TR14307_c0_g1,TR14507_c0_g1,TR3076_c0_g1,TR3242_c0_g1,TR3636_c0_g1,TR4032_c1_g1,TR5498_c0_g1,TR1255_c0_g1	0.961948338165425	0.99662522362562	0.125628140703518
GO:1901265	nucleoside phosphate binding	MF	25	199	270	1627	TR1008_c1_g1,TR1163_c0_g2,TR14307_c0_g1,TR14507_c0_g1,TR3076_c0_g1,TR3242_c0_g1,TR3636_c0_g1,TR4032_c1_g1,TR5498_c0_g1,TR1255_c0_g1,TR1386_c0_g1,TR1758_c0_g1,TR1817_c0_g1,TR4839_c0_g1,TR8106_c0_g1,TR1430_c0_g1,TR11397_c0_g1,TR420_c0_g1,TR420_c0_g2,TR4270_c0_g1,TR591_c0_g1,TR24_c2_g1,TR13_c0_g1,TR5183_c0_g1,TR2607_c0_g1	0.961948338165425	0.99662522362562	0.125628140703518
GO:0016021	integral component of membrane	CC	30	233	270	1627	TR10464_c0_g1,TR108_c0_g1,TR1227_c1_g1,TR12812_c0_g1,TR2129_c0_g1,TR2607_c0_g1,TR3471_c0_g1,TR4697_c0_g1,TR547_c0_g3,TR6239_c0_g1,TR7064_c0_g1,TR849_c0_g1,TR1000_c0_g1,TR1024_c0_g1,TR11032_c0_g1,TR13183_c0_g1,TR13205_c0_g1,TR1418_c0_g1,TR16413_c0_g1,TR19156_c0_g1,TR2562_c0_g1,TR2806_c0_g1,TR396_c0_g1,TR4023_c0_g1,TR4196_c0_g1,TR4705_c0_g1,TR561_c0_g1,TR6684_c0_g1,TR7354_c0_g1,TR912_c0_g1	0.962411702173054	0.99662522362562	0.128755364806867
GO:0031224	intrinsic component of membrane	CC	30	233	270	1627	TR10464_c0_g1,TR108_c0_g1,TR1227_c1_g1,TR12812_c0_g1,TR2129_c0_g1,TR2607_c0_g1,TR3471_c0_g1,TR4697_c0_g1,TR547_c0_g3,TR6239_c0_g1,TR7064_c0_g1,TR849_c0_g1,TR1000_c0_g1,TR1024_c0_g1,TR11032_c0_g1,TR13183_c0_g1,TR13205_c0_g1,TR1418_c0_g1,TR16413_c0_g1,TR19156_c0_g1,TR2562_c0_g1,TR2806_c0_g1,TR396_c0_g1,TR4023_c0_g1,TR4196_c0_g1,TR4705_c0_g1,TR561_c0_g1,TR6684_c0_g1,TR7354_c0_g1,TR912_c0_g1	0.962411702173054	0.99662522362562	0.128755364806867
GO:0042623	ATPase activity, coupled	MF	1	18	270	1627	TR1758_c0_g1	0.962565610614891	0.99662522362562	0.0555555555555556
GO:0140110	transcription regulator activity	MF	1	18	270	1627	TR5095_c0_g1	0.962565610614891	0.99662522362562	0.0555555555555556
GO:1901362	organic cyclic compound biosynthetic process	BP	17	144	270	1627	TR1243_c0_g1,TR6610_c0_g1,TR8315_c0_g1,TR484_c0_g1,TR4856_c1_g1,TR1103_c0_g1,TR2079_c0_g2,TR792_c0_g1,TR8357_c0_g1,TR3246_c0_g1,TR5095_c0_g1,TR10320_c0_g1,TR10328_c0_g1,TR3800_c0_g1,TR591_c0_g1,TR10464_c0_g1,TR10975_c0_g1	0.963082428352596	0.99662522362562	0.118055555555556
GO:0008150	biological_process	BP	153	998	270	1627	TR14507_c0_g1,TR3636_c0_g1,TR420_c0_g1,TR420_c0_g2,TR4270_c0_g1,TR3246_c0_g1,TR16714_c0_g1,TR14446_c0_g1,TR10975_c0_g1,TR591_c0_g1,TR1392_c1_g1,TR1419_c0_g1,TR2386_c0_g1,TR370_c0_g1,TR4032_c1_g1,TR4644_c0_g1,TR6035_c0_g1,TR7636_c0_g1,TR7640_c0_g1,TR10420_c0_g1,TR10863_c0_g1,TR2222_c0_g1,TR2410_c1_g1,TR3288_c0_g1,TR3954_c0_g1,TR4327_c0_g1,TR4813_c0_g1,TR5298_c0_g1,TR8503_c0_g2,TR1243_c0_g1,TR4856_…	0.963142989992919	0.99662522362562	0.153306613226453
GO:0006139	nucleobase-containing compound metabolic process	BP	28	220	270	1627	TR14507_c0_g1,TR3636_c0_g1,TR10975_c0_g1,TR1243_c0_g1,TR547_c0_g3,TR1817_c0_g1,TR6610_c0_g1,TR8315_c0_g1,TR484_c0_g1,TR4856_c1_g1,TR1103_c0_g1,TR2079_c0_g2,TR792_c0_g1,TR8357_c0_g1,TR3246_c0_g1,TR5095_c0_g1,TR10320_c0_g1,TR2699_c0_g1,TR14307_c0_g1,TR1386_c0_g1,TR1163_c0_g2,TR3800_c0_g1,TR10464_c0_g1,TR421_c0_g1,TR6239_c0_g1,TR1758_c0_g1,TR2890_c0_g1,TR1903_c0_g4	0.963580844866685	0.99662522362562	0.127272727272727
GO:0097367	carbohydrate derivative binding	MF	11	101	270	1627	TR1386_c0_g1,TR1758_c0_g1,TR1817_c0_g1,TR4839_c0_g1,TR8106_c0_g1,TR1430_c0_g1,TR11397_c0_g1,TR420_c0_g1,TR420_c0_g2,TR4270_c0_g1,TR591_c0_g1	0.963805380154128	0.99662522362562	0.108910891089109
GO:0044249	cellular biosynthetic process	BP	31	241	270	1627	TR14507_c0_g1,TR3636_c0_g1,TR1243_c0_g1,TR1817_c0_g1,TR6610_c0_g1,TR8315_c0_g1,TR484_c0_g1,TR4856_c1_g1,TR1103_c0_g1,TR2079_c0_g2,TR792_c0_g1,TR8357_c0_g1,TR3246_c0_g1,TR5095_c0_g1,TR10320_c0_g1,TR1973_c0_g1,TR4317_c0_g1,TR709_c0_g1,TR365_c0_g2,TR14307_c0_g1,TR1386_c0_g1,TR3800_c0_g1,TR1227_c1_g1,TR1832_c0_g1,TR10328_c0_g1,TR591_c0_g1,TR5183_c0_g1,TR10464_c0_g1,TR2890_c0_g1,TR10975_c0_g1,TR421_c0…	0.965454464845049	0.99662522362562	0.128630705394191
GO:0050660	flavin adenine dinucleotide binding	MF	2	29	270	1627	TR2607_c0_g1,TR13_c0_g1	0.96603310763867	0.99662522362562	0.0689655172413793
GO:0009058	biosynthetic process	BP	32	248	270	1627	TR14507_c0_g1,TR3636_c0_g1,TR1243_c0_g1,TR1817_c0_g1,TR6610_c0_g1,TR8315_c0_g1,TR484_c0_g1,TR4856_c1_g1,TR1103_c0_g1,TR2079_c0_g2,TR792_c0_g1,TR8357_c0_g1,TR3246_c0_g1,TR5095_c0_g1,TR10320_c0_g1,TR1973_c0_g1,TR4317_c0_g1,TR709_c0_g1,TR365_c0_g2,TR14307_c0_g1,TR1386_c0_g1,TR3800_c0_g1,TR1227_c1_g1,TR1832_c0_g1,TR10328_c0_g1,TR591_c0_g1,TR5183_c0_g1,TR10464_c0_g1,TR2890_c0_g1,TR10975_c0_g1,TR421_c0…	0.966114557564054	0.99662522362562	0.129032258064516
GO:0005975	carbohydrate metabolic process	BP	6	64	270	1627	TR16714_c0_g1,TR38_c0_g2,TR1390_c0_g1,TR17046_c0_g1,TR4640_c0_g1,TR5848_c0_g1	0.968216196025725	0.99662522362562	0.09375
GO:0006810	transport	BP	29	229	270	1627	TR3971_c0_g1,TR8106_c0_g1,TR2523_c0_g1,TR14438_c0_g1,TR18062_c0_g1,TR4761_c0_g1,TR108_c0_g1,TR3407_c0_g1,TR4697_c0_g1,TR547_c0_g3,TR7064_c0_g1,TR10464_c0_g1,TR1758_c0_g1,TR1136_c0_g1,TR1108_c0_g1,TR3471_c0_g1,TR4039_c0_g1,TR1000_c0_g1,TR13183_c0_g1,TR19156_c0_g1,TR2562_c0_g1,TR396_c0_g1,TR332_c0_g1,TR405_c0_g1,TR4227_c0_g1,TR4596_c0_g1,TR5368_c0_g1,TR1361_c0_g1,TR1530_c0_g1	0.968703647053652	0.99662522362562	0.126637554585153
GO:0051234	establishment of localization	BP	29	229	270	1627	TR3971_c0_g1,TR8106_c0_g1,TR332_c0_g1,TR405_c0_g1,TR4227_c0_g1,TR4596_c0_g1,TR5368_c0_g1,TR1361_c0_g1,TR1530_c0_g1,TR2523_c0_g1,TR14438_c0_g1,TR18062_c0_g1,TR4761_c0_g1,TR108_c0_g1,TR3407_c0_g1,TR4697_c0_g1,TR547_c0_g3,TR7064_c0_g1,TR10464_c0_g1,TR1758_c0_g1,TR1136_c0_g1,TR1108_c0_g1,TR3471_c0_g1,TR4039_c0_g1,TR1000_c0_g1,TR13183_c0_g1,TR19156_c0_g1,TR2562_c0_g1,TR396_c0_g1	0.968703647053652	0.99662522362562	0.126637554585153
GO:0044270	cellular nitrogen compound catabolic process	BP	1	19	270	1627	TR6217_c0_g1	0.96884732915683	0.99662522362562	0.0526315789473684
GO:0046700	heterocycle catabolic process	BP	1	19	270	1627	TR6217_c0_g1	0.96884732915683	0.99662522362562	0.0526315789473684
GO:0008509	anion transmembrane transporter activity	MF	1	19	270	1627	TR3407_c0_g1	0.96884732915683	0.99662522362562	0.0526315789473684
GO:0097159	organic cyclic compound binding	MF	41	310	270	1627	TR1008_c1_g1,TR1163_c0_g2,TR14307_c0_g1,TR14507_c0_g1,TR3076_c0_g1,TR3242_c0_g1,TR3636_c0_g1,TR4032_c1_g1,TR5498_c0_g1,TR1255_c0_g1,TR1903_c0_g4,TR264_c1_g3,TR264_c1_g4,TR48_c0_g2,TR1738_c0_g1,TR1817_c0_g1,TR4768_c0_g1,TR5095_c0_g1,TR4317_c0_g1,TR709_c0_g1,TR2699_c0_g1,TR1386_c0_g1,TR1758_c0_g1,TR4839_c0_g1,TR8106_c0_g1,TR1430_c0_g1,TR11397_c0_g1,TR420_c0_g1,TR420_c0_g2,TR4270_c0_g1,TR591_c0_g1,T…	0.970597321807964	0.99662522362562	0.132258064516129
GO:1901363	heterocyclic compound binding	MF	41	310	270	1627	TR1008_c1_g1,TR1163_c0_g2,TR14307_c0_g1,TR14507_c0_g1,TR3076_c0_g1,TR3242_c0_g1,TR3636_c0_g1,TR4032_c1_g1,TR5498_c0_g1,TR1255_c0_g1,TR1903_c0_g4,TR264_c1_g3,TR264_c1_g4,TR48_c0_g2,TR1738_c0_g1,TR1817_c0_g1,TR4768_c0_g1,TR5095_c0_g1,TR4317_c0_g1,TR709_c0_g1,TR2699_c0_g1,TR1386_c0_g1,TR1758_c0_g1,TR4839_c0_g1,TR8106_c0_g1,TR1430_c0_g1,TR11397_c0_g1,TR420_c0_g1,TR420_c0_g2,TR4270_c0_g1,TR591_c0_g1,T…	0.970597321807964	0.99662522362562	0.132258064516129
GO:0006820	anion transport	BP	2	30	270	1627	TR3407_c0_g1,TR2523_c0_g1	0.97092126325121	0.99662522362562	0.0666666666666667
GO:0018130	heterocycle biosynthetic process	BP	16	140	270	1627	TR1243_c0_g1,TR6610_c0_g1,TR8315_c0_g1,TR484_c0_g1,TR4856_c1_g1,TR1103_c0_g1,TR2079_c0_g2,TR792_c0_g1,TR8357_c0_g1,TR3246_c0_g1,TR5095_c0_g1,TR10320_c0_g1,TR3800_c0_g1,TR591_c0_g1,TR10464_c0_g1,TR10975_c0_g1	0.971359522717465	0.99662522362562	0.114285714285714
GO:1901576	organic substance biosynthetic process	BP	31	244	270	1627	TR14507_c0_g1,TR3636_c0_g1,TR1243_c0_g1,TR1817_c0_g1,TR6610_c0_g1,TR8315_c0_g1,TR484_c0_g1,TR4856_c1_g1,TR1103_c0_g1,TR2079_c0_g2,TR792_c0_g1,TR8357_c0_g1,TR3246_c0_g1,TR5095_c0_g1,TR10320_c0_g1,TR1973_c0_g1,TR4317_c0_g1,TR709_c0_g1,TR365_c0_g2,TR14307_c0_g1,TR1386_c0_g1,TR3800_c0_g1,TR1227_c1_g1,TR1832_c0_g1,TR10328_c0_g1,TR591_c0_g1,TR5183_c0_g1,TR10464_c0_g1,TR2890_c0_g1,TR10975_c0_g1,TR421_c0…	0.971714081856161	0.99662522362562	0.127049180327869
GO:0051179	localization	BP	29	231	270	1627	TR3971_c0_g1,TR8106_c0_g1,TR332_c0_g1,TR405_c0_g1,TR4227_c0_g1,TR4596_c0_g1,TR5368_c0_g1,TR1361_c0_g1,TR1530_c0_g1,TR2523_c0_g1,TR14438_c0_g1,TR18062_c0_g1,TR4761_c0_g1,TR108_c0_g1,TR3407_c0_g1,TR4697_c0_g1,TR547_c0_g3,TR7064_c0_g1,TR10464_c0_g1,TR1758_c0_g1,TR1136_c0_g1,TR1108_c0_g1,TR3471_c0_g1,TR4039_c0_g1,TR1000_c0_g1,TR13183_c0_g1,TR19156_c0_g1,TR2562_c0_g1,TR396_c0_g1	0.972721825855132	0.99662522362562	0.125541125541126
GO:0090304	nucleic acid metabolic process	BP	23	190	270	1627	TR14507_c0_g1,TR3636_c0_g1,TR10975_c0_g1,TR1243_c0_g1,TR1817_c0_g1,TR6610_c0_g1,TR8315_c0_g1,TR484_c0_g1,TR4856_c1_g1,TR1103_c0_g1,TR2079_c0_g2,TR792_c0_g1,TR8357_c0_g1,TR3246_c0_g1,TR5095_c0_g1,TR10320_c0_g1,TR2699_c0_g1,TR14307_c0_g1,TR1386_c0_g1,TR1163_c0_g2,TR1903_c0_g4,TR2890_c0_g1,TR421_c0_g1	0.972977347048222	0.99662522362562	0.121052631578947
GO:0090407	organophosphate biosynthetic process	BP	1	20	270	1627	TR10464_c0_g1	0.974078188067063	0.99662522362562	0.05
GO:0016773	phosphotransferase activity, alcohol group as acceptor	MF	1	20	270	1627	TR3246_c0_g1	0.974078188067063	0.99662522362562	0.05
GO:0044271	cellular nitrogen compound biosynthetic process	BP	23	191	270	1627	TR1243_c0_g1,TR6610_c0_g1,TR8315_c0_g1,TR484_c0_g1,TR4856_c1_g1,TR1103_c0_g1,TR2079_c0_g2,TR792_c0_g1,TR8357_c0_g1,TR3246_c0_g1,TR5095_c0_g1,TR10320_c0_g1,TR1973_c0_g1,TR4317_c0_g1,TR709_c0_g1,TR365_c0_g2,TR14307_c0_g1,TR1386_c0_g1,TR3800_c0_g1,TR5183_c0_g1,TR10464_c0_g1,TR10975_c0_g1,TR591_c0_g1	0.974933953604441	0.99662522362562	0.120418848167539
GO:0005886	plasma membrane	CC	2	31	270	1627	TR591_c0_g1,TR1136_c0_g1	0.975129385468989	0.99662522362562	0.0645161290322581
GO:1901361	organic cyclic compound catabolic process	BP	1	21	270	1627	TR6217_c0_g1	0.978433439605267	0.997460182061012	0.0476190476190476
GO:0010467	gene expression	BP	21	179	270	1627	TR1243_c0_g1,TR6610_c0_g1,TR8315_c0_g1,TR484_c0_g1,TR4856_c1_g1,TR1103_c0_g1,TR2079_c0_g2,TR792_c0_g1,TR8357_c0_g1,TR3246_c0_g1,TR5095_c0_g1,TR10320_c0_g1,TR2699_c0_g1,TR10975_c0_g1,TR1973_c0_g1,TR4317_c0_g1,TR709_c0_g1,TR365_c0_g2,TR14307_c0_g1,TR1386_c0_g1,TR4090_c0_g3	0.978486143284716	0.997460182061012	0.11731843575419
GO:0034654	nucleobase-containing compound biosynthetic process	BP	14	129	270	1627	TR1243_c0_g1,TR6610_c0_g1,TR8315_c0_g1,TR484_c0_g1,TR4856_c1_g1,TR1103_c0_g1,TR2079_c0_g2,TR792_c0_g1,TR8357_c0_g1,TR3246_c0_g1,TR5095_c0_g1,TR10320_c0_g1,TR10464_c0_g1,TR10975_c0_g1	0.978880041414777	0.997460182061012	0.108527131782946
GO:0050662	coenzyme binding	MF	5	62	270	1627	TR4305_c0_g1,TR13_c0_g1,TR5183_c0_g1,TR2607_c0_g1,TR3784_c0_g1	0.98508003604984	0.997907029295245	0.0806451612903226
GO:0022857	transmembrane transporter activity	MF	8	87	270	1627	TR1758_c0_g1,TR547_c0_g3,TR7064_c0_g1,TR10464_c0_g1,TR3407_c0_g1,TR4697_c0_g1,TR4596_c0_g1,TR1361_c0_g1	0.985470722297637	0.997907029295245	0.0919540229885057
GO:0036094	small molecule binding	MF	26	219	270	1627	TR1008_c1_g1,TR1163_c0_g2,TR14307_c0_g1,TR14507_c0_g1,TR3076_c0_g1,TR3242_c0_g1,TR3636_c0_g1,TR4032_c1_g1,TR5498_c0_g1,TR1255_c0_g1,TR1386_c0_g1,TR1758_c0_g1,TR1817_c0_g1,TR4839_c0_g1,TR8106_c0_g1,TR1430_c0_g1,TR11397_c0_g1,TR420_c0_g1,TR420_c0_g2,TR4270_c0_g1,TR591_c0_g1,TR24_c2_g1,TR4305_c0_g1,TR13_c0_g1,TR5183_c0_g1,TR2607_c0_g1	0.985479376432711	0.997907029295245	0.118721461187215
GO:0008270	zinc ion binding	MF	3	45	270	1627	TR3335_c0_g1,TR5095_c0_g1,TR4607_c0_g1	0.986955887739802	0.997907029295245	0.0666666666666667
GO:0044238	primary metabolic process	BP	56	423	270	1627	TR14507_c0_g1,TR3636_c0_g1,TR3246_c0_g1,TR16714_c0_g1,TR14446_c0_g1,TR10975_c0_g1,TR1243_c0_g1,TR1390_c0_g1,TR17046_c0_g1,TR4640_c0_g1,TR5848_c0_g1,TR38_c0_g2,TR547_c0_g3,TR1817_c0_g1,TR6610_c0_g1,TR8315_c0_g1,TR484_c0_g1,TR4856_c1_g1,TR1103_c0_g1,TR2079_c0_g2,TR792_c0_g1,TR8357_c0_g1,TR5095_c0_g1,TR10320_c0_g1,TR2699_c0_g1,TR1973_c0_g1,TR4317_c0_g1,TR709_c0_g1,TR365_c0_g2,TR14307_c0_g1,TR1386_c0…	0.988390740013357	0.997907029295245	0.132387706855792
GO:0016887	ATPase activity	MF	2	36	270	1627	TR1758_c0_g1,TR4839_c0_g1	0.988760828778584	0.997907029295245	0.0555555555555556
GO:0016070	RNA metabolic process	BP	17	158	270	1627	TR1243_c0_g1,TR6610_c0_g1,TR8315_c0_g1,TR484_c0_g1,TR4856_c1_g1,TR1103_c0_g1,TR2079_c0_g2,TR792_c0_g1,TR8357_c0_g1,TR3246_c0_g1,TR5095_c0_g1,TR10320_c0_g1,TR2699_c0_g1,TR10975_c0_g1,TR14307_c0_g1,TR1386_c0_g1,TR1903_c0_g4	0.98877016067041	0.997907029295245	0.107594936708861
GO:0043168	anion binding	MF	15	145	270	1627	TR1386_c0_g1,TR1758_c0_g1,TR1817_c0_g1,TR4839_c0_g1,TR8106_c0_g1,TR1430_c0_g1,TR11397_c0_g1,TR420_c0_g1,TR420_c0_g2,TR4270_c0_g1,TR591_c0_g1,TR4305_c0_g1,TR13_c0_g1,TR2607_c0_g1,TR4032_c1_g1	0.990483871664658	0.997907029295245	0.103448275862069
GO:0016301	kinase activity	MF	1	26	270	1627	TR3246_c0_g1	0.991419001266978	0.997907029295245	0.0384615384615385
GO:0016798	hydrolase activity, acting on glycosyl bonds	MF	3	49	270	1627	TR1390_c0_g1,TR16714_c0_g1,TR5848_c0_g1	0.992767307604785	0.997907029295245	0.0612244897959184
GO:0004497	monooxygenase activity	MF	1	29	270	1627	TR2607_c0_g1	0.995071295998667	0.997907029295245	0.0344827586206897
GO:0043167	ion binding	MF	36	303	270	1627	TR4793_c0_g1,TR1477_c0_g1,TR3241_c0_g1,TR370_c0_g1,TR4231_c0_g1,TR9716_c0_g1,TR1103_c0_g1,TR1776_c0_g1,TR2079_c0_g2,TR4242_c0_g1,TR1227_c1_g1,TR2607_c0_g1,TR547_c0_g3,TR2718_c0_g1,TR16469_c0_g1,TR2262_c0_g1,TR971_c0_g1,TR1386_c0_g1,TR1758_c0_g1,TR1817_c0_g1,TR4839_c0_g1,TR8106_c0_g1,TR1430_c0_g1,TR11397_c0_g1,TR420_c0_g1,TR420_c0_g2,TR4270_c0_g1,TR591_c0_g1,TR18385_c0_g1,TR3335_c0_g1,TR5095_c0_g1…	0.995437312125473	0.997907029295245	0.118811881188119
GO:0005488	binding	MF	70	529	270	1627	TR8106_c0_g1,TR1008_c1_g1,TR1163_c0_g2,TR14307_c0_g1,TR14507_c0_g1,TR3076_c0_g1,TR3242_c0_g1,TR3636_c0_g1,TR4032_c1_g1,TR5498_c0_g1,TR1255_c0_g1,TR24_c2_g1,TR2955_c0_g1,TR4793_c0_g1,TR591_c0_g1,TR1903_c0_g4,TR264_c1_g3,TR264_c1_g4,TR48_c0_g2,TR1738_c0_g1,TR1817_c0_g1,TR4768_c0_g1,TR5095_c0_g1,TR4317_c0_g1,TR709_c0_g1,TR2699_c0_g1,TR4242_c0_g1,TR1477_c0_g1,TR3241_c0_g1,TR370_c0_g1,TR4231_c0_g1,TR9…	0.995842536810264	0.997907029295245	0.132325141776938
GO:0008144	drug binding	MF	7	90	270	1627	TR1386_c0_g1,TR1758_c0_g1,TR1817_c0_g1,TR4839_c0_g1,TR8106_c0_g1,TR1430_c0_g1,TR4305_c0_g1	0.996166952522589	0.997907029295245	0.0777777777777778
GO:0005215	transporter activity	MF	10	115	270	1627	TR1758_c0_g1,TR547_c0_g3,TR7064_c0_g1,TR4596_c0_g1,TR1361_c0_g1,TR14438_c0_g1,TR3991_c0_g1,TR10464_c0_g1,TR3407_c0_g1,TR4697_c0_g1	0.996180481686367	0.997907029295245	0.0869565217391304
GO:0005524	ATP binding	MF	6	83	270	1627	TR1386_c0_g1,TR1758_c0_g1,TR1817_c0_g1,TR4839_c0_g1,TR8106_c0_g1,TR1430_c0_g1	0.996928689070446	0.997907029295245	0.072289156626506
GO:0030554	adenyl nucleotide binding	MF	6	83	270	1627	TR1386_c0_g1,TR1758_c0_g1,TR1817_c0_g1,TR4839_c0_g1,TR8106_c0_g1,TR1430_c0_g1	0.996928689070446	0.997907029295245	0.072289156626506
GO:0032559	adenyl ribonucleotide binding	MF	6	83	270	1627	TR1386_c0_g1,TR1758_c0_g1,TR1817_c0_g1,TR4839_c0_g1,TR8106_c0_g1,TR1430_c0_g1	0.996928689070446	0.997907029295245	0.072289156626506
GO:0016772	transferase activity, transferring phosphorus-containing groups	MF	1	43	270	1627	TR3246_c0_g1	0.999634934076814	0.999634934076814	0.0232558139534884
